# Supplementary material for: A Preliminary Psychometric Assessment of the Attitude of Tertiary Health Trainee Undergraduate Students Towards Breast - Self Examination in K.N.U.S.T, Ghana
Source: Preprints.org preprint supplement (doi:10.20944/preprints202103.0251.v1), 2021-03-09
Supplement: Supplementary file 1 [file supplementary]

## Sheet: Sheet1
1. GENDER	2. Age	3. UNIVERSITY / UNIVERSITY COLLEGE	4. PROGRAM OF STUDY (PLEASE TYPE) â€¦â€¦â€¦â€¦..	5. LEVEL OF STUDY	6. RELIGIOUS BACKGROUND	7. OCCUPATION	1. I am confident I know how to correctly perform a breast exam	2. I am afraid of examining my breasts for fear of what I might find	3. I am too embarrassed to touch my breasts	4. I do not have time to regularly examine my breasts	5. I do not have the privacy to regularly examine my breasts	6. I would be embarrassed if I thought I found a problem from my breast self - examination and it turned out to be nothing	7. I often forget to perform a breast self examination.	8. My religious or cultural beliefs have taught me that touching my breast is wrong	9. I think that breast self - examinations are too complicated to do correctly.	10. I believe that breast cancer is treatable if detected early.	11. I believe that breast cancer could be a serious threat to my health.	12. If I were to get breast cancer, I believe nothing could be done to save my life and / or my breasts.	13. Daily activities, which may involve touching my breasts, such as bathing or sexual activity, cannot take the place of a breast self - examination.	14. I think that breast self examination may be helpful in detecting breast cancer.	15. Besides a breast self- examination, other health examinations, such as a mammogram or a clinical breast examination, are effective ways to detect cancer.	16. My primary health care provider told me of the importance of breast self - examination.	17. Most of my friends and family members think a breast self - examination is a good idea.	18. Doing a breast self - examination serves as a positive role model for other women and girls in my family and my friends' families.	19. I like to be well informed of matters regarding my own health.	20. I am embarrassed to discuss my personal medical issues with my family or my circle of friends	21. I believe that people who are going to die from a disease will die regardless of what is done.	22. There are many things I can do to help keep a disease from getting worse	23. I take responsibility for my own health.	24. I am important enough to take good care of myself.	1. If I get sick, it is my own behavior which determines how soon i get well	2. No matter what I do, if I am going to be sick, I will get sick.	3. Having regular contact with my Physician is the best way for me to avoid illness	4.Most things that affect my health happen to me by accident	5. Whenever I don't feel well, I should consult a medically trained	6. I am in control of my health	7. My family has a lot to do with my becoming sick or staying healthy	8. When I get sick, am to blame.	9. Luck plays a big part to determine how soon I recover from an illness	10. Health professionals control my health	11. My good health is largely a matter of good fortune	12. The main thing which affect my health is what I myself do	13. If I take care of myself, I can avoid illness	14. When I recover from an illness, its usually because other people (for example, doctors, nurses, family, friends) have been taking good care of me.	15. No matter what I do, I'm likely to get sick	16. If its meant to be, I will stay healthy	17. If I take the right actions, I can stay healthy	18. Regarding my health, I can only do what my doctor tells me to do	1. Have you ever self examined your breast?
Female	18	K.N.U.S.T	Midwifery	2ND YEAR	CHRISTIANITY	1. Student	4. Agree a little	1.Strongly disagree	1.Strongly disagree	3. Disagree a little	1.Strongly disagree	1.Strongly disagree	3. Disagree a little	1.Strongly disagree	1.Strongly disagree	6. Strongly agree	1.Strongly disagree	1.Strongly disagree	6. Strongly agree	6. Strongly agree	6. Strongly agree	6. Strongly agree	6. Strongly agree	6. Strongly agree	6. Strongly agree	4. Agree a little	6. Strongly agree	6. Strongly agree	3. Disagree a little	6. Strongly agree	Strongly agree	Slightly agree	Slightly agree	Strongly agree	Strongly agree	Slightly agree	Slightly agree	Slightly agree	Strongly disagree	Strongly disagree	Slightly disagree	Strongly agree	Strongly agree	Moderately agree	Strongly disagree	Strongly agree	Strongly agree	Strongly disagree	Yes
Female	20	K.N.U.S.T	BSc Midwifery	2ND YEAR	CHRISTIANITY	1. Student	1.Strongly disagree	3. Disagree a little	3. Disagree a little	6. Strongly agree	6. Strongly agree	4. Agree a little	6. Strongly agree	6. Strongly agree	5. Agree somehow	6. Strongly agree	6. Strongly agree	1.Strongly disagree	6. Strongly agree	6. Strongly agree	6. Strongly agree	1.Strongly disagree	6. Strongly agree	6. Strongly agree	6. Strongly agree	4. Agree a little	6. Strongly agree	6. Strongly agree	6. Strongly agree	6. Strongly agree	Moderately agree	Slightly agree	Moderately agree	Moderately disagree	Strongly agree	Moderately agree	Moderately agree	Slightly agree	Slightly disagree	Slightly agree	Slightly disagree	Moderately agree	Moderately agree	Moderately agree	Moderately agree	Moderately agree	Moderately agree	Slightly agree	No
Female	20	K.N.U.S.T	Bsc midwifery	2ND YEAR	CHRISTIANITY	1. Student	6. Strongly agree	1.Strongly disagree	1.Strongly disagree	1.Strongly disagree	1.Strongly disagree	3. Disagree a little	1.Strongly disagree	1.Strongly disagree	1.Strongly disagree	6. Strongly agree	6. Strongly agree	1.Strongly disagree	6. Strongly agree	6. Strongly agree	6. Strongly agree	6. Strongly agree	6. Strongly agree	6. Strongly agree	6. Strongly agree	1.Strongly disagree	3. Disagree a little	1.Strongly disagree	6. Strongly agree	6. Strongly agree	Moderately agree	Strongly disagree	Moderately agree	Strongly disagree	Strongly agree	Strongly agree	Moderately agree	Strongly disagree	Slightly disagree	Strongly disagree	Strongly disagree	Moderately agree	Strongly agree	Moderately agree	Strongly disagree	Moderately disagree	Strongly agree	Moderately agree	Yes
Male	24	K.N.U.S.T	Nursing	2ND YEAR	CHRISTIANITY	1. Student	4. Agree a little	3. Disagree a little	1.Strongly disagree	2. Disagree somehow	1.Strongly disagree	2. Disagree somehow	6. Strongly agree	1.Strongly disagree	5. Agree somehow	6. Strongly agree	6. Strongly agree	1.Strongly disagree	2. Disagree somehow	6. Strongly agree	5. Agree somehow	5. Agree somehow	2. Disagree somehow	4. Agree a little	6. Strongly agree	4. Agree a little	2. Disagree somehow	6. Strongly agree	5. Agree somehow	5. Agree somehow	Slightly agree	Strongly disagree	Moderately agree	Slightly disagree	Strongly agree	Moderately agree	Slightly disagree	Moderately disagree	Strongly disagree	Moderately disagree	Slightly agree	Moderately agree	Moderately agree	Slightly agree	Moderately disagree	Strongly agree	Strongly agree	Slightly disagree	No
Female	19	K.N.U.S.T	Nursing	2ND YEAR	CHRISTIANITY	1. Student	4. Agree a little	1.Strongly disagree	1.Strongly disagree	4. Agree a little	1.Strongly disagree	1.Strongly disagree	6. Strongly agree	1.Strongly disagree	4. Agree a little	6. Strongly agree	6. Strongly agree	1.Strongly disagree	4. Agree a little	6. Strongly agree	6. Strongly agree		4. Agree a little	4. Agree a little	6. Strongly agree	1.Strongly disagree	4. Agree a little	6. Strongly agree	4. Agree a little	6. Strongly agree	Slightly agree	Strongly disagree	Strongly disagree	Strongly disagree	Strongly disagree	Slightly disagree	Slightly agree	Moderately agree	Strongly disagree	Slightly disagree	Strongly disagree	Strongly agree	Strongly agree	Moderately agree	Slightly agree	Slightly disagree	Slightly agree	Strongly disagree	Yes
Female	20	K.N.U.S.T	Midwifery	2ND YEAR	CHRISTIANITY	1. Student	4. Agree a little	1.Strongly disagree	1.Strongly disagree	1.Strongly disagree	1.Strongly disagree	1.Strongly disagree	3. Disagree a little	2. Disagree somehow	3. Disagree a little	3. Disagree a little	3. Disagree a little	4. Agree a little	4. Agree a little	4. Agree a little	2. Disagree somehow	2. Disagree somehow	2. Disagree somehow	3. Disagree a little	2. Disagree somehow	1.Strongly disagree	3. Disagree a little	4. Agree a little	6. Strongly agree	5. Agree somehow	Moderately disagree	Moderately disagree	Slightly disagree	Slightly disagree	Slightly agree	Slightly agree	Moderately disagree	Slightly disagree	Moderately disagree	Strongly disagree	Strongly disagree	Strongly disagree	Strongly disagree	Strongly disagree	Strongly disagree	Slightly agree	Slightly disagree	Slightly disagree	Yes
Female	19	K.N.U.S.T	Midwifery	2ND YEAR	CHRISTIANITY	1. Student	5. Agree somehow	1.Strongly disagree	1.Strongly disagree	1.Strongly disagree	1.Strongly disagree	2. Disagree somehow	4. Agree a little	4. Agree a little	1.Strongly disagree	6. Strongly agree	6. Strongly agree	1.Strongly disagree	6. Strongly agree	6. Strongly agree	6. Strongly agree	3. Disagree a little	6. Strongly agree	6. Strongly agree	6. Strongly agree	1.Strongly disagree	1.Strongly disagree	6. Strongly agree	6. Strongly agree	6. Strongly agree	Strongly disagree	Strongly disagree	Slightly agree	Strongly disagree	Strongly agree	Strongly agree	Moderately disagree	Strongly disagree	Strongly disagree	Strongly disagree	Slightly disagree	Strongly agree	Strongly agree	Moderately agree	Strongly disagree	Strongly disagree	Strongly agree	Slightly disagree	Yes
Female		K.N.U.S.T	Bsc Nursing	2ND YEAR	CHRISTIANITY	1. Student	3. Disagree a little	1.Strongly disagree	1.Strongly disagree	5. Agree somehow	2. Disagree somehow	2. Disagree somehow	6. Strongly agree	1.Strongly disagree	2. Disagree somehow	5. Agree somehow	6. Strongly agree	4. Agree a little	3. Disagree a little	6. Strongly agree	6. Strongly agree	5. Agree somehow	4. Agree a little	5. Agree somehow	5. Agree somehow	4. Agree a little	4. Agree a little	6. Strongly agree	5. Agree somehow	4. Agree a little	Slightly agree	Moderately disagree	Moderately agree	Slightly agree	Strongly agree	Strongly agree	Moderately disagree	Slightly agree	Strongly disagree	Strongly disagree	Slightly disagree	Strongly agree	Moderately agree	Slightly agree	Slightly agree	Moderately agree	Slightly agree	Slightly agree	Yes
Female		K.N.U.S.T	Bsc Midwifery	2ND YEAR	ISLAMIC	1. Student	3. Disagree a little	1.Strongly disagree	1.Strongly disagree	5. Agree somehow	5. Agree somehow	1.Strongly disagree	4. Agree a little	4. Agree a little	1.Strongly disagree	6. Strongly agree	6. Strongly agree	5. Agree somehow	6. Strongly agree	6. Strongly agree	6. Strongly agree	4. Agree a little	6. Strongly agree	6. Strongly agree	6. Strongly agree	3. Disagree a little	6. Strongly agree	6. Strongly agree	6. Strongly agree	6. Strongly agree	Slightly agree	Slightly agree	Moderately agree	Slightly agree	Strongly agree	Strongly agree	Strongly agree	Moderately agree	Strongly agree	Strongly agree	Moderately agree	Strongly agree	Strongly agree	Strongly agree	Strongly agree	Strongly agree	Strongly agree	Slightly agree	Yes
Male	21	K.N.U.S.T	Bsc Nursing	2ND YEAR	CHRISTIANITY	1. Student	2. Disagree somehow	5. Agree somehow	4. Agree a little	5. Agree somehow	3. Disagree a little	4. Agree a little	6. Strongly agree	1.Strongly disagree	2. Disagree somehow	6. Strongly agree	6. Strongly agree	1.Strongly disagree	5. Agree somehow	4. Agree a little	4. Agree a little	6. Strongly agree	6. Strongly agree	6. Strongly agree	6. Strongly agree	5. Agree somehow	3. Disagree a little	6. Strongly agree	5. Agree somehow	4. Agree a little	Slightly disagree	Strongly disagree	Strongly disagree	Slightly agree	Strongly agree	Moderately agree	Strongly disagree	Moderately agree	Strongly disagree	Strongly disagree	Strongly disagree	Moderately agree	Moderately agree	Slightly agree	Slightly agree	Moderately agree	Strongly agree	Slightly agree	Yes
Female	18	K.N.U.S.T	Bsc. Midwifery	2ND YEAR	CHRISTIANITY	1. Student	1.Strongly disagree	2. Disagree somehow	1.Strongly disagree	6. Strongly agree	1.Strongly disagree	6. Strongly agree	6. Strongly agree	1.Strongly disagree	5. Agree somehow	6. Strongly agree	6. Strongly agree	1.Strongly disagree	6. Strongly agree	6. Strongly agree	6. Strongly agree	6. Strongly agree	6. Strongly agree	6. Strongly agree	6. Strongly agree	6. Strongly agree	1.Strongly disagree	6. Strongly agree	6. Strongly agree	6. Strongly agree	Strongly agree	Strongly disagree	Strongly agree	Moderately disagree	Strongly agree	Moderately agree	Strongly disagree	Strongly agree	Strongly agree	Strongly disagree	Strongly disagree	Strongly agree	Strongly agree	Moderately disagree	Strongly disagree	Strongly agree	Strongly agree	Strongly agree	No
Female	19	K.N.U.S.T	BSc. Midwifery	2ND YEAR	CHRISTIANITY	1. Student	2. Disagree somehow	1.Strongly disagree	1.Strongly disagree	5. Agree somehow	5. Agree somehow	1.Strongly disagree	6. Strongly agree	1.Strongly disagree	3. Disagree a little	6. Strongly agree	5. Agree somehow	2. Disagree somehow	2. Disagree somehow	6. Strongly agree	6. Strongly agree	2. Disagree somehow	5. Agree somehow	5. Agree somehow	6. Strongly agree	1.Strongly disagree	1.Strongly disagree	5. Agree somehow	6. Strongly agree	6. Strongly agree	Strongly agree	Strongly disagree	Moderately agree	Slightly agree	Strongly agree	Strongly agree	Slightly agree	Moderately disagree	Slightly agree	Moderately agree	Strongly agree	Strongly agree	Strongly agree	Slightly agree	Strongly agree	Moderately disagree	Strongly agree	Strongly disagree	Yes
Male	21	K.N.U.S.T	Bsc Nursing	2ND YEAR	CHRISTIANITY	1. Student	2. Disagree somehow	1.Strongly disagree	1.Strongly disagree	2. Disagree somehow	2. Disagree somehow	2. Disagree somehow	3. Disagree a little	1.Strongly disagree	1.Strongly disagree	6. Strongly agree	6. Strongly agree	1.Strongly disagree	5. Agree somehow	6. Strongly agree	6. Strongly agree	4. Agree a little	6. Strongly agree	5. Agree somehow	6. Strongly agree	4. Agree a little	5. Agree somehow	6. Strongly agree	6. Strongly agree	5. Agree somehow	Moderately agree	Moderately agree	Slightly agree	Slightly agree	Moderately agree	Moderately agree	Moderately agree	Moderately agree	Moderately disagree	Moderately disagree	Slightly agree	Moderately agree	Moderately agree	Moderately agree	Moderately agree	Slightly agree	Strongly agree	Slightly agree	Yes
Male	21	K.N.U.S.T	Bsc Nursing	2ND YEAR	CHRISTIANITY	1. Student	2. Disagree somehow	1.Strongly disagree	1.Strongly disagree	2. Disagree somehow	2. Disagree somehow	2. Disagree somehow	3. Disagree a little	1.Strongly disagree	1.Strongly disagree	6. Strongly agree	6. Strongly agree	1.Strongly disagree	5. Agree somehow	6. Strongly agree	6. Strongly agree	4. Agree a little	6. Strongly agree	5. Agree somehow	6. Strongly agree	4. Agree a little	5. Agree somehow	6. Strongly agree	6. Strongly agree	5. Agree somehow	Moderately agree	Moderately agree	Slightly agree	Slightly agree	Moderately agree	Moderately agree	Moderately agree	Moderately agree	Moderately disagree	Moderately disagree	Slightly agree	Moderately agree	Moderately agree	Moderately agree	Moderately agree	Slightly agree	Strongly agree	Slightly agree	Yes
Female	28	K.N.U.S.T		3RD YEAR	CHRISTIANITY	1. Student	6. Strongly agree	1.Strongly disagree	1.Strongly disagree	4. Agree a little	1.Strongly disagree	3. Disagree a little	5. Agree somehow	1.Strongly disagree	2. Disagree somehow	6. Strongly agree	6. Strongly agree	5. Agree somehow	6. Strongly agree	6. Strongly agree	6. Strongly agree	4. Agree a little	5. Agree somehow	6. Strongly agree	6. Strongly agree	1.Strongly disagree	4. Agree a little	6. Strongly agree	6. Strongly agree	6. Strongly agree	Moderately agree	Strongly disagree	Moderately agree	Moderately disagree	Strongly agree	Moderately agree	Moderately agree	Slightly disagree	Moderately disagree	Slightly disagree	Strongly disagree	Slightly agree	Moderately agree	Moderately agree	Moderately disagree	Moderately disagree	Moderately agree	Slightly disagree	Yes
Female	27	K.N.U.S.T	Bsc emergency nursing	3RD YEAR	CHRISTIANITY	5. Health Professional/ Allied health Professional	6. Strongly agree	5. Agree somehow	1.Strongly disagree	5. Agree somehow	1.Strongly disagree	1.Strongly disagree	6. Strongly agree	1.Strongly disagree	4. Agree a little	6. Strongly agree	6. Strongly agree	1.Strongly disagree	6. Strongly agree	6. Strongly agree	6. Strongly agree	6. Strongly agree	6. Strongly agree	6. Strongly agree	6. Strongly agree	5. Agree somehow	1.Strongly disagree	6. Strongly agree	6. Strongly agree	6. Strongly agree	Strongly agree	Strongly disagree	Slightly agree	Strongly disagree	Strongly agree	Moderately agree	Slightly agree	Slightly agree	Moderately disagree	Moderately disagree	Strongly disagree	Strongly agree	Strongly agree	Strongly agree	Strongly disagree	Strongly agree	Strongly agree	Strongly agree	Yes
Female	20	K.N.U.S.T	Midwifery	2ND YEAR	CHRISTIANITY	1. Student	4. Agree a little	1.Strongly disagree	1.Strongly disagree	4. Agree a little	4. Agree a little	5. Agree somehow	6. Strongly agree	1.Strongly disagree	2. Disagree somehow	6. Strongly agree	6. Strongly agree	1.Strongly disagree	3. Disagree a little	6. Strongly agree	6. Strongly agree	3. Disagree a little	5. Agree somehow	4. Agree a little	6. Strongly agree	6. Strongly agree	1.Strongly disagree	6. Strongly agree	6. Strongly agree	6. Strongly agree	Slightly agree	Moderately disagree	Slightly disagree	Slightly agree	Strongly agree	Strongly agree	Slightly disagree	Slightly agree	Moderately disagree	Strongly disagree	Moderately disagree	Slightly disagree	Strongly agree	Slightly agree	Moderately disagree	Moderately disagree	Moderately agree	Moderately disagree	Yes
Female		K.N.U.S.T	Bsc nursing	2ND YEAR	CHRISTIANITY	1. Student	4. Agree a little	5. Agree somehow	1.Strongly disagree	1.Strongly disagree	1.Strongly disagree	5. Agree somehow	4. Agree a little	1.Strongly disagree	4. Agree a little	6. Strongly agree	6. Strongly agree	1.Strongly disagree	1.Strongly disagree	6. Strongly agree	6. Strongly agree	6. Strongly agree	6. Strongly agree	6. Strongly agree	6. Strongly agree	1.Strongly disagree	1.Strongly disagree	6. Strongly agree	6. Strongly agree	6. Strongly agree	Strongly agree	Slightly disagree	Strongly agree	Strongly agree	Strongly agree	Strongly agree	Strongly agree	Strongly disagree	Strongly disagree	Strongly agree	Strongly agree	Strongly agree	Strongly agree	Strongly agree	Strongly agree	Strongly agree	Strongly agree	Slightly disagree	Yes
Male	20	K.N.U.S.T	Bsc nursing	2ND YEAR	CHRISTIANITY	1. Student	2. Disagree somehow	4. Agree a little	1.Strongly disagree	4. Agree a little	4. Agree a little	3. Disagree a little	5. Agree somehow	1.Strongly disagree	4. Agree a little	6. Strongly agree	6. Strongly agree	1.Strongly disagree	6. Strongly agree	5. Agree somehow	6. Strongly agree	6. Strongly agree	4. Agree a little	4. Agree a little	6. Strongly agree	4. Agree a little	1.Strongly disagree	6. Strongly agree	4. Agree a little	4. Agree a little	Slightly agree	Strongly disagree	Slightly agree	Strongly disagree	Moderately agree	Slightly agree	Moderately disagree	Moderately agree	Moderately disagree	Moderately disagree	Moderately disagree	Moderately agree	Moderately agree	Moderately disagree	Slightly agree	Moderately disagree	Strongly disagree	Moderately disagree	Yes
Male	31	K.N.U.S.T	BSC. EMERGENCY NURSING	3RD YEAR	CHRISTIANITY	5. Health Professional/ Allied health Professional	6. Strongly agree	1.Strongly disagree	1.Strongly disagree	1.Strongly disagree	1.Strongly disagree	1.Strongly disagree	1.Strongly disagree	1.Strongly disagree	1.Strongly disagree	6. Strongly agree	6. Strongly agree	1.Strongly disagree	6. Strongly agree	6. Strongly agree	6. Strongly agree	6. Strongly agree	6. Strongly agree	6. Strongly agree	6. Strongly agree	1.Strongly disagree	1.Strongly disagree	6. Strongly agree	6. Strongly agree	6. Strongly agree	Strongly agree	Strongly disagree	Slightly agree	Strongly disagree	Strongly agree	Strongly agree	Strongly agree	Strongly agree	Slightly disagree	Strongly disagree	Strongly disagree	Strongly agree	Strongly agree	Strongly agree	Strongly disagree	Moderately disagree	Strongly agree	Strongly agree	Yes
Female	20	K.N.U.S.T	Bsc Midwifery	2ND YEAR	CHRISTIANITY	1. Student	4. Agree a little	1.Strongly disagree	1.Strongly disagree	4. Agree a little	1.Strongly disagree	5. Agree somehow	6. Strongly agree	1.Strongly disagree	4. Agree a little	6. Strongly agree	6. Strongly agree	1.Strongly disagree	4. Agree a little	6. Strongly agree	5. Agree somehow	2. Disagree somehow	5. Agree somehow	4. Agree a little	6. Strongly agree	6. Strongly agree	4. Agree a little	6. Strongly agree	6. Strongly agree	6. Strongly agree	Strongly agree	Slightly agree	Slightly agree	Slightly agree	Strongly agree	Strongly agree	Slightly agree	Strongly disagree	Strongly agree	Strongly disagree	Strongly agree	Slightly agree	Strongly agree	Strongly agree	Slightly disagree	Slightly agree	Moderately agree	Slightly agree	Yes
Male	21	K.N.U.S.T	Nursing	2ND YEAR	CHRISTIANITY	1. Student	2. Disagree somehow	1.Strongly disagree	1.Strongly disagree	4. Agree a little	2. Disagree somehow	1.Strongly disagree	2. Disagree somehow	2. Disagree somehow	4. Agree a little	1.Strongly disagree	1.Strongly disagree	2. Disagree somehow	5. Agree somehow	4. Agree a little	5. Agree somehow	5. Agree somehow	4. Agree a little	1.Strongly disagree	6. Strongly agree	3. Disagree a little	2. Disagree somehow	4. Agree a little	6. Strongly agree	6. Strongly agree	Moderately agree	Strongly disagree	Slightly disagree	Strongly disagree	Slightly disagree	Moderately agree	Moderately disagree	Slightly disagree	Strongly disagree	Strongly disagree	Strongly disagree	Moderately agree	Strongly agree	Slightly agree	Strongly agree	Moderately disagree	Moderately agree	Strongly disagree	No
Female	20	K.N.U.S.T	Nursing	2ND YEAR	CHRISTIANITY	1. Student	5. Agree somehow	2. Disagree somehow	1.Strongly disagree	4. Agree a little	1.Strongly disagree	2. Disagree somehow	5. Agree somehow	2. Disagree somehow	2. Disagree somehow	5. Agree somehow	4. Agree a little	3. Disagree a little	6. Strongly agree	4. Agree a little	6. Strongly agree	5. Agree somehow	6. Strongly agree	6. Strongly agree	6. Strongly agree	3. Disagree a little	1.Strongly disagree	6. Strongly agree	6. Strongly agree	6. Strongly agree	Slightly agree	Strongly disagree	Moderately disagree	Moderately disagree	Strongly agree	Moderately disagree	Moderately disagree	Strongly disagree	Strongly disagree	Strongly disagree	Slightly disagree	Moderately agree	Moderately agree	Moderately agree	Strongly disagree	Strongly agree	Moderately agree	Slightly agree	Yes
Male	31	K.N.U.S.T	Emergency nursing	3RD YEAR	CHRISTIANITY	5. Health Professional/ Allied health Professional	4. Agree a little	1.Strongly disagree	1.Strongly disagree	1.Strongly disagree	1.Strongly disagree	1.Strongly disagree	1.Strongly disagree	1.Strongly disagree	1.Strongly disagree	6. Strongly agree	6. Strongly agree	1.Strongly disagree	1.Strongly disagree	6. Strongly agree	6. Strongly agree	1.Strongly disagree	4. Agree a little	1.Strongly disagree	6. Strongly agree	5. Agree somehow	4. Agree a little	6. Strongly agree	6. Strongly agree	6. Strongly agree	Moderately agree	Strongly disagree	Slightly disagree	Moderately disagree	Moderately agree	Slightly agree	Moderately disagree	Moderately agree	Moderately disagree	Slightly agree	Strongly disagree	Strongly agree	Strongly agree	Slightly agree	Slightly agree	Moderately agree	Strongly agree	Moderately agree	Yes
Male	20	K.N.U.S.T	Bsc Nursing	2ND YEAR	ISLAMIC	1. Student	3. Disagree a little	3. Disagree a little	3. Disagree a little	2. Disagree somehow	2. Disagree somehow	2. Disagree somehow	2. Disagree somehow	2. Disagree somehow	3. Disagree a little	4. Agree a little	3. Disagree a little	3. Disagree a little	3. Disagree a little	4. Agree a little	4. Agree a little	4. Agree a little	4. Agree a little	4. Agree a little	4. Agree a little	3. Disagree a little	4. Agree a little	4. Agree a little	4. Agree a little	5. Agree somehow	Moderately agree	Slightly disagree	Slightly disagree	Slightly disagree	Moderately agree	Slightly agree	Moderately agree	Moderately disagree	Slightly agree	Slightly disagree	Slightly agree	Slightly agree	Slightly agree	Slightly agree	Slightly disagree	Moderately agree	Moderately agree	Moderately agree	No
Male	20	K.N.U.S.T	Bsc. Nursing	2ND YEAR	CHRISTIANITY	1. Student	6. Strongly agree	1.Strongly disagree	6. Strongly agree	4. Agree a little	4. Agree a little	1.Strongly disagree	1.Strongly disagree	1.Strongly disagree	1.Strongly disagree	6. Strongly agree	6. Strongly agree	1.Strongly disagree	1.Strongly disagree	6. Strongly agree	6. Strongly agree	6. Strongly agree	6. Strongly agree	6. Strongly agree	6. Strongly agree	4. Agree a little	5. Agree somehow	6. Strongly agree	6. Strongly agree	6. Strongly agree	Strongly agree	Strongly disagree	Strongly disagree	Moderately disagree	Strongly agree	Strongly agree	Slightly disagree	Strongly disagree	Slightly agree	Strongly disagree	Slightly agree	Strongly agree	Strongly agree	Strongly disagree	Strongly disagree	Strongly disagree	Strongly agree	Strongly disagree	Yes
Female	31	K.N.U.S.T	Emergency nursing	3RD YEAR	CHRISTIANITY	1. Student	6. Strongly agree	1.Strongly disagree	1.Strongly disagree	4. Agree a little	1.Strongly disagree	3. Disagree a little	4. Agree a little	1.Strongly disagree	2. Disagree somehow	6. Strongly agree	6. Strongly agree	2. Disagree somehow	5. Agree somehow	6. Strongly agree	6. Strongly agree	4. Agree a little	6. Strongly agree	6. Strongly agree	6. Strongly agree	1.Strongly disagree	1.Strongly disagree	6. Strongly agree	6. Strongly agree	6. Strongly agree	Strongly agree	Moderately disagree	Strongly agree	Moderately agree	Strongly agree	Strongly agree	Moderately disagree	Strongly agree	Strongly disagree	Strongly disagree	Moderately agree	Strongly agree	Strongly agree	Moderately agree	Strongly disagree	Strongly disagree	Strongly agree	Moderately agree	Yes
Female	21	K.N.U.S.T	Bsc. Midwifery	2ND YEAR	CHRISTIANITY	1. Student	4. Agree a little	4. Agree a little	1.Strongly disagree	6. Strongly agree	5. Agree somehow	5. Agree somehow	6. Strongly agree	1.Strongly disagree	5. Agree somehow	6. Strongly agree	6. Strongly agree	1.Strongly disagree	2. Disagree somehow	6. Strongly agree	5. Agree somehow	6. Strongly agree	6. Strongly agree	6. Strongly agree	6. Strongly agree	4. Agree a little	3. Disagree a little	6. Strongly agree	4. Agree a little	6. Strongly agree	Strongly agree	Moderately disagree	Strongly disagree	Slightly agree	Strongly agree	Strongly agree	Strongly agree	Moderately disagree	Strongly disagree	Slightly agree	Moderately disagree	Moderately agree	Strongly agree	Moderately agree	Moderately disagree	Moderately disagree	Strongly agree	Strongly agree	Yes
Female	34 years	K.N.U.S.T	Emergency Nursing	3RD YEAR	CHRISTIANITY	5. Health Professional/ Allied health Professional	5. Agree somehow	1.Strongly disagree	1.Strongly disagree	1.Strongly disagree	1.Strongly disagree	1.Strongly disagree	4. Agree a little	1.Strongly disagree	1.Strongly disagree	6. Strongly agree	5. Agree somehow	1.Strongly disagree	4. Agree a little	6. Strongly agree	6. Strongly agree	6. Strongly agree	6. Strongly agree	6. Strongly agree	6. Strongly agree	2. Disagree somehow	1.Strongly disagree	6. Strongly agree	6. Strongly agree	6. Strongly agree	Strongly agree	Strongly disagree	Strongly agree	Moderately agree	Strongly agree	Strongly agree	Strongly disagree	Strongly disagree	Slightly agree	Strongly disagree	Strongly agree	Slightly agree	Strongly agree	Slightly agree	Slightly agree	Strongly agree	Strongly agree	Strongly agree	Yes
Male	37	K.N.U.S.T	Bsc Emergency Nursing	3RD YEAR	CHRISTIANITY	1. Student	6. Strongly agree	1.Strongly disagree	1.Strongly disagree	4. Agree a little	4. Agree a little	4. Agree a little	4. Agree a little	5. Agree somehow	3. Disagree a little	4. Agree a little		3. Disagree a little	3. Disagree a little	3. Disagree a little	3. Disagree a little	3. Disagree a little	1.Strongly disagree	1.Strongly disagree	1.Strongly disagree	1.Strongly disagree	1.Strongly disagree	1.Strongly disagree	1.Strongly disagree	1.Strongly disagree	Slightly agree	Strongly disagree	Slightly agree	Slightly agree	Strongly agree	Strongly agree	Slightly disagree	Moderately agree	Slightly agree	Slightly agree	Slightly agree	Slightly agree	Slightly agree	Slightly disagree	Slightly agree	Slightly disagree	Slightly agree	Strongly agree	Yes
Female	24	K.N.U.S.T	BSc, Nursing	2ND YEAR	CHRISTIANITY	1. Student	1.Strongly disagree	3. Disagree a little	1.Strongly disagree	2. Disagree somehow	2. Disagree somehow	5. Agree somehow	3. Disagree a little	1.Strongly disagree	4. Agree a little	6. Strongly agree				6. Strongly agree	6. Strongly agree	6. Strongly agree	5. Agree somehow	6. Strongly agree	6. Strongly agree	6. Strongly agree	3. Disagree a little		3. Disagree a little	3. Disagree a little	Strongly agree	Slightly disagree	Strongly agree	Slightly disagree	Strongly agree	Strongly agree	Strongly agree	Strongly agree	Moderately disagree	Slightly disagree	Strongly agree	Strongly agree	Strongly agree	Strongly agree	Moderately disagree	Strongly agree	Strongly agree	Strongly agree	No
Female	18	K.N.U.S.T	Nursing	2ND YEAR	CHRISTIANITY	1. Student	4. Agree a little	2. Disagree somehow	1.Strongly disagree	4. Agree a little	1.Strongly disagree	1.Strongly disagree		1.Strongly disagree	1.Strongly disagree	6. Strongly agree	5. Agree somehow	1.Strongly disagree	6. Strongly agree	6. Strongly agree	6. Strongly agree	6. Strongly agree	6. Strongly agree	5. Agree somehow	6. Strongly agree	1.Strongly disagree	2. Disagree somehow	5. Agree somehow	4. Agree a little	5. Agree somehow	Slightly agree	Strongly disagree	Strongly disagree	Slightly agree	Slightly agree	Slightly agree	Slightly disagree	Moderately disagree	Strongly disagree	Strongly disagree	Slightly disagree	Slightly agree	Moderately agree	Slightly agree	Strongly disagree	Strongly agree	Strongly agree	Strongly disagree	Yes
Female	18	K.N.U.S.T	Bsc. Midwifery	2ND YEAR	CHRISTIANITY	1. Student	3. Disagree a little	6. Strongly agree	1.Strongly disagree	6. Strongly agree	6. Strongly agree	4. Agree a little	4. Agree a little	1.Strongly disagree	6. Strongly agree	6. Strongly agree	5. Agree somehow	1.Strongly disagree	2. Disagree somehow	6. Strongly agree	4. Agree a little	4. Agree a little	4. Agree a little	5. Agree somehow	6. Strongly agree	4. Agree a little	1.Strongly disagree	6. Strongly agree	6. Strongly agree	4. Agree a little	Strongly agree	Strongly disagree	Slightly agree	Slightly agree	Strongly agree	Strongly agree	Strongly agree	Strongly agree	Strongly disagree	Slightly agree	Slightly agree	Moderately agree	Strongly agree	Slightly agree	Slightly agree	Slightly disagree	Strongly agree	Moderately agree	No
Female	18	K.N.U.S.T	Bsc. Midwifery	2ND YEAR	CHRISTIANITY	1. Student	3. Disagree a little	6. Strongly agree	1.Strongly disagree	6. Strongly agree	6. Strongly agree	4. Agree a little	4. Agree a little	1.Strongly disagree	6. Strongly agree	6. Strongly agree	5. Agree somehow	1.Strongly disagree	2. Disagree somehow	6. Strongly agree	4. Agree a little	4. Agree a little	4. Agree a little	5. Agree somehow	6. Strongly agree	4. Agree a little	1.Strongly disagree	6. Strongly agree	6. Strongly agree	4. Agree a little	Strongly agree	Strongly disagree	Slightly agree	Slightly agree	Strongly agree	Strongly agree	Strongly agree	Strongly agree	Strongly disagree	Slightly agree	Slightly agree	Moderately agree	Strongly agree	Slightly agree	Slightly agree	Slightly disagree	Strongly agree	Moderately agree	No
Male	19	K.N.U.S.T	BSc.Nursing	2ND YEAR	CHRISTIANITY	1. Student	2. Disagree somehow	5. Agree somehow	1.Strongly disagree	5. Agree somehow	4. Agree a little	6. Strongly agree	2. Disagree somehow	5. Agree somehow	1.Strongly disagree	6. Strongly agree	6. Strongly agree	1.Strongly disagree	5. Agree somehow	6. Strongly agree	6. Strongly agree	6. Strongly agree	6. Strongly agree	6. Strongly agree	6. Strongly agree	5. Agree somehow	1.Strongly disagree	6. Strongly agree	5. Agree somehow	4. Agree a little	Moderately agree	Strongly disagree	Moderately agree	Slightly disagree	Slightly agree	Strongly agree	Slightly disagree	Moderately agree	Strongly disagree	Slightly disagree	Moderately agree	Strongly agree	Moderately agree	Slightly agree	Moderately agree	Moderately agree	Strongly agree	Strongly disagree	No
Male	31	K.N.U.S.T	Bsc Emergency nursing	3RD YEAR	ISLAMIC	1. Student	4. Agree a little	1.Strongly disagree	1.Strongly disagree	3. Disagree a little	1.Strongly disagree	2. Disagree somehow	6. Strongly agree	1.Strongly disagree	1.Strongly disagree	6. Strongly agree	6. Strongly agree	5. Agree somehow	6. Strongly agree	6. Strongly agree	6. Strongly agree	6. Strongly agree	6. Strongly agree	6. Strongly agree	6. Strongly agree	1.Strongly disagree	1.Strongly disagree	6. Strongly agree	6. Strongly agree	6. Strongly agree	Slightly agree	Moderately disagree	Strongly agree	Slightly agree	Strongly agree	Slightly disagree	Strongly disagree	Strongly disagree	Slightly disagree	Strongly disagree	Strongly disagree	Strongly agree	Moderately disagree	Slightly agree	Slightly agree	Slightly agree	Strongly agree	Slightly agree	Yes
							4. Agree a little	6. Strongly agree	1.Strongly disagree	5. Agree somehow	1.Strongly disagree	5. Agree somehow	4. Agree a little	1.Strongly disagree	5. Agree somehow	6. Strongly agree	4. Agree a little	1.Strongly disagree	6. Strongly agree	6. Strongly agree	6. Strongly agree	5. Agree somehow	4. Agree a little	4. Agree a little	5. Agree somehow	5. Agree somehow	4. Agree a little	4. Agree a little	3. Disagree a little	4. Agree a little	Strongly agree	Strongly disagree	Slightly disagree	Slightly agree	Slightly disagree	Moderately disagree	Slightly disagree	Moderately agree	Strongly disagree	Strongly disagree	Slightly agree	Slightly agree	Slightly agree	Moderately disagree	Strongly disagree	Moderately agree	Strongly agree	Strongly disagree	No
Female	23	K.N.U.S.T		2ND YEAR	ISLAMIC	1. Student	4. Agree a little	1.Strongly disagree	3. Disagree a little	4. Agree a little	1.Strongly disagree	2. Disagree somehow	6. Strongly agree	1.Strongly disagree	5. Agree somehow	6. Strongly agree	6. Strongly agree	5. Agree somehow	3. Disagree a little	5. Agree somehow	6. Strongly agree	1.Strongly disagree	6. Strongly agree	4. Agree a little	6. Strongly agree	5. Agree somehow	6. Strongly agree	6. Strongly agree	6. Strongly agree	4. Agree a little	Moderately agree	Slightly agree	Strongly agree	Strongly disagree	Strongly agree	Strongly disagree	Strongly disagree	Strongly disagree	Strongly disagree	Strongly disagree	Strongly disagree	Strongly disagree	Slightly disagree	Strongly disagree	Strongly agree	Strongly agree	Moderately agree	Strongly disagree	Yes
Female		K.N.U.S.T	Emergency nursing	3RD YEAR	CHRISTIANITY	5. Health Professional/ Allied health Professional	6. Strongly agree	5. Agree somehow	1.Strongly disagree	6. Strongly agree	1.Strongly disagree	1.Strongly disagree	6. Strongly agree	1.Strongly disagree	2. Disagree somehow	6. Strongly agree	6. Strongly agree	1.Strongly disagree	1.Strongly disagree	6. Strongly agree	6. Strongly agree	6. Strongly agree	6. Strongly agree	6. Strongly agree	6. Strongly agree	5. Agree somehow	1.Strongly disagree	6. Strongly agree	6. Strongly agree	6. Strongly agree	Strongly agree	Strongly disagree	Strongly disagree	Strongly disagree	Strongly agree	Strongly agree	Strongly disagree	Moderately agree	Strongly agree	Strongly disagree	Strongly disagree	Strongly agree	Strongly agree	Strongly disagree	Strongly disagree	Moderately agree	Strongly agree	Moderately agree	Yes
Female	22	K.N.U.S.T	Midwifery	2ND YEAR	CHRISTIANITY	1. Student	4. Agree a little	4. Agree a little	4. Agree a little	5. Agree somehow	4. Agree a little	4. Agree a little	4. Agree a little	1.Strongly disagree	4. Agree a little	4. Agree a little	4. Agree a little	4. Agree a little	4. Agree a little	4. Agree a little	4. Agree a little	4. Agree a little	4. Agree a little	4. Agree a little	4. Agree a little	4. Agree a little	4. Agree a little	4. Agree a little	4. Agree a little	4. Agree a little	Slightly agree	Slightly agree	Slightly agree	Slightly agree	Slightly agree	Slightly agree	Slightly agree	Slightly agree	Slightly agree	Slightly agree	Slightly disagree	Slightly agree	Slightly agree	Slightly agree	Slightly agree	Slightly agree	Slightly agree	Slightly agree	Yes
Female	21	K.N.U.S.T	Bsc Nursing	2ND YEAR	CHRISTIANITY	1. Student	5. Agree somehow	2. Disagree somehow	1.Strongly disagree	1.Strongly disagree	1.Strongly disagree	4. Agree a little	4. Agree a little	1.Strongly disagree	4. Agree a little	5. Agree somehow	6. Strongly agree	2. Disagree somehow	5. Agree somehow	5. Agree somehow	6. Strongly agree	1.Strongly disagree	4. Agree a little	6. Strongly agree	6. Strongly agree	5. Agree somehow	2. Disagree somehow	6. Strongly agree	6. Strongly agree	6. Strongly agree	Moderately agree	Slightly agree	Slightly agree	Slightly disagree	Slightly agree	Moderately agree	Slightly agree	Slightly agree	Moderately disagree	Slightly disagree	Moderately agree	Moderately agree	Moderately agree	Moderately agree	Slightly disagree	Moderately agree	Moderately agree	Slightly agree	Yes
Female	19	K.N.U.S.T	Nursing	2ND YEAR	CHRISTIANITY	1. Student	4. Agree a little	1.Strongly disagree	1.Strongly disagree	1.Strongly disagree	1.Strongly disagree	1.Strongly disagree	4. Agree a little	1.Strongly disagree	1.Strongly disagree	6. Strongly agree	4. Agree a little	1.Strongly disagree	5. Agree somehow	1.Strongly disagree	4. Agree a little	4. Agree a little	4. Agree a little	4. Agree a little	6. Strongly agree	4. Agree a little	1.Strongly disagree	6. Strongly agree	6. Strongly agree	5. Agree somehow	Moderately agree	Strongly disagree	Moderately agree	Slightly agree	Strongly agree	Slightly agree	Slightly agree	Slightly agree	Strongly disagree	Slightly agree	Strongly agree	Slightly agree	Strongly agree	Strongly agree	Strongly disagree	Strongly disagree	Strongly agree	Slightly agree	Yes
Female	19	K.N.U.S.T	Midwifery	2ND YEAR	CHRISTIANITY	1. Student	1.Strongly disagree	4. Agree a little	2. Disagree somehow	4. Agree a little	4. Agree a little	5. Agree somehow	3. Disagree a little	2. Disagree somehow	3. Disagree a little	2. Disagree somehow	4. Agree a little	4. Agree a little	4. Agree a little	3. Disagree a little	3. Disagree a little	5. Agree somehow	5. Agree somehow	5. Agree somehow	4. Agree a little	4. Agree a little	3. Disagree a little	4. Agree a little	6. Strongly agree	6. Strongly agree	Slightly agree	Slightly agree	Moderately agree	Moderately agree	Strongly agree	Strongly agree	Moderately agree	Moderately agree	Moderately agree	Moderately agree	Moderately agree	Strongly agree	Moderately agree	Strongly agree	Strongly agree	Moderately agree	Strongly agree	Strongly agree	Yes
Female	19	K.N.U.S.T	BSC. NURSING	2ND YEAR	CHRISTIANITY	1. Student	6. Strongly agree	1.Strongly disagree	1.Strongly disagree	4. Agree a little	5. Agree somehow	5. Agree somehow	5. Agree somehow	6. Strongly agree	2. Disagree somehow	6. Strongly agree	6. Strongly agree	5. Agree somehow	6. Strongly agree	6. Strongly agree	6. Strongly agree	6. Strongly agree	6. Strongly agree	6. Strongly agree	6. Strongly agree	6. Strongly agree	5. Agree somehow	5. Agree somehow	6. Strongly agree	6. Strongly agree	Strongly agree	Slightly agree	Moderately agree	Moderately agree	Moderately disagree	Moderately agree	Strongly agree	Moderately agree	Moderately agree	Slightly agree	Moderately agree	Strongly agree	Strongly agree	Slightly disagree	Moderately disagree	Moderately agree	Strongly agree	Moderately disagree	Yes
Female	19	K.N.U.S.T	Bsc Midwifery	2ND YEAR	None	1. Student	4. Agree a little	1.Strongly disagree	1.Strongly disagree	4. Agree a little	6. Strongly agree	5. Agree somehow	6. Strongly agree	1.Strongly disagree	5. Agree somehow	6. Strongly agree	1.Strongly disagree	1.Strongly disagree	6. Strongly agree	6. Strongly agree	6. Strongly agree	1.Strongly disagree	4. Agree a little	4. Agree a little	6. Strongly agree	1.Strongly disagree	1.Strongly disagree	6. Strongly agree	6. Strongly agree	6. Strongly agree	Strongly agree	Strongly disagree	Slightly disagree	Strongly disagree	Slightly disagree	Strongly agree	Strongly disagree	Strongly agree	Strongly disagree	Strongly disagree	Strongly disagree	Strongly agree	Strongly agree	Strongly disagree	Strongly disagree	Slightly disagree	Strongly agree	Strongly disagree	Yes
Female	20	K.N.U.S.T	Midwifery	2ND YEAR	ISLAMIC	1. Student	3. Disagree a little	1.Strongly disagree	2. Disagree somehow	1.Strongly disagree	1.Strongly disagree	1.Strongly disagree	2. Disagree somehow	2. Disagree somehow	1.Strongly disagree	2. Disagree somehow	1.Strongly disagree	1.Strongly disagree	1.Strongly disagree	2. Disagree somehow	1.Strongly disagree	2. Disagree somehow	1.Strongly disagree	1.Strongly disagree	1.Strongly disagree	4. Agree a little	3. Disagree a little	3. Disagree a little	2. Disagree somehow	2. Disagree somehow	Moderately disagree	Moderately disagree	Moderately disagree	Moderately agree	Moderately agree	Moderately disagree	Slightly agree	Strongly disagree	Moderately disagree	Strongly disagree	Moderately disagree	Moderately disagree	Slightly disagree	Slightly agree	Moderately disagree	Moderately agree	Strongly disagree	Slightly disagree	Yes
Male	22	K.N.U.S.T	Bsc.Nursing	2ND YEAR	CHRISTIANITY	1. Student	5. Agree somehow	4. Agree a little	5. Agree somehow	6. Strongly agree	2. Disagree somehow	4. Agree a little	2. Disagree somehow	2. Disagree somehow	2. Disagree somehow	6. Strongly agree	6. Strongly agree	1.Strongly disagree	4. Agree a little	5. Agree somehow	6. Strongly agree	5. Agree somehow	5. Agree somehow	6. Strongly agree	6. Strongly agree	6. Strongly agree	3. Disagree a little	6. Strongly agree	6. Strongly agree	6. Strongly agree	Strongly agree	Strongly disagree	Slightly agree	Slightly agree	Strongly agree	Moderately agree	Moderately agree	Moderately agree	Moderately disagree	Slightly agree	Slightly agree	Strongly agree	Strongly agree	Moderately disagree	Strongly disagree	Moderately disagree	Strongly agree	Slightly agree	No
Female	22	K.N.U.S.T	Midwifery	2ND YEAR	ISLAMIC	1. Student	6. Strongly agree	1.Strongly disagree	1.Strongly disagree	5. Agree somehow	1.Strongly disagree	1.Strongly disagree	5. Agree somehow	1.Strongly disagree	6. Strongly agree	6. Strongly agree	6. Strongly agree	6. Strongly agree	6. Strongly agree	6. Strongly agree	6. Strongly agree	6. Strongly agree	6. Strongly agree	6. Strongly agree	6. Strongly agree	1.Strongly disagree	1.Strongly disagree	6. Strongly agree	6. Strongly agree	6. Strongly agree	Moderately agree	Strongly disagree	Moderately agree	Slightly agree	Strongly agree	Strongly agree	Slightly agree	Strongly disagree	Strongly disagree	Strongly disagree	Strongly disagree	Slightly agree	Strongly agree	Moderately agree	Moderately agree	Strongly agree	Strongly agree	Moderately agree	Yes
Female	19	K.N.U.S.T	Midwifery	2ND YEAR	CHRISTIANITY	1. Student	1.Strongly disagree	4. Agree a little	1.Strongly disagree	2. Disagree somehow	6. Strongly agree	5. Agree somehow	6. Strongly agree	5. Agree somehow	5. Agree somehow	6. Strongly agree	6. Strongly agree	1.Strongly disagree	6. Strongly agree	6. Strongly agree	6. Strongly agree	5. Agree somehow	5. Agree somehow	6. Strongly agree	6. Strongly agree	6. Strongly agree	6. Strongly agree	6. Strongly agree	6. Strongly agree	5. Agree somehow	Strongly agree	Moderately disagree	Strongly disagree	Strongly disagree	Strongly agree	Strongly agree	Slightly agree	Moderately disagree	Moderately disagree	Strongly disagree	Strongly disagree	Moderately agree	Strongly agree	Slightly agree	Moderately agree	Strongly agree	Strongly agree	Strongly disagree	No
Female	20 years	K.N.U.S.T	BSc. Midwifery	2ND YEAR	CHRISTIANITY	1. Student	6. Strongly agree	1.Strongly disagree	1.Strongly disagree	1.Strongly disagree	1.Strongly disagree	5. Agree somehow	5. Agree somehow	1.Strongly disagree	5. Agree somehow	5. Agree somehow	6. Strongly agree	1.Strongly disagree	5. Agree somehow	5. Agree somehow	6. Strongly agree	6. Strongly agree	5. Agree somehow	5. Agree somehow	6. Strongly agree	5. Agree somehow	4. Agree a little	6. Strongly agree	6. Strongly agree	4. Agree a little	Strongly agree	Moderately agree	Slightly agree	Strongly disagree	Moderately agree	Moderately agree	Moderately agree	Moderately disagree	Strongly agree	Moderately agree	Strongly agree	Moderately agree	Strongly disagree	Moderately agree	Moderately agree	Strongly agree	Strongly agree	Moderately agree	Yes
Female	20	K.N.U.S.T	Bsc midwifery	2ND YEAR	CHRISTIANITY	1. Student	5. Agree somehow	1.Strongly disagree	1.Strongly disagree	1.Strongly disagree	1.Strongly disagree	1.Strongly disagree	2. Disagree somehow	1.Strongly disagree	2. Disagree somehow	6. Strongly agree	5. Agree somehow	2. Disagree somehow	1.Strongly disagree	1.Strongly disagree	6. Strongly agree	1.Strongly disagree	6. Strongly agree	6. Strongly agree	6. Strongly agree	1.Strongly disagree	4. Agree a little	5. Agree somehow	5. Agree somehow	6. Strongly agree	Moderately agree	Moderately disagree	Moderately disagree	Slightly disagree	Moderately agree	Slightly agree	Moderately agree	Strongly disagree	Moderately disagree	Slightly disagree	Slightly agree	Moderately agree	Moderately agree	Strongly agree	Strongly disagree	Slightly agree	Strongly agree	Moderately disagree	Yes
Female	19	K.N.U.S.T	Midwifery	2ND YEAR	CHRISTIANITY	1. Student	3. Disagree a little	1.Strongly disagree	1.Strongly disagree	6. Strongly agree	4. Agree a little	1.Strongly disagree	6. Strongly agree	1.Strongly disagree	1.Strongly disagree	6. Strongly agree	6. Strongly agree	1.Strongly disagree	4. Agree a little	6. Strongly agree	6. Strongly agree	1.Strongly disagree	6. Strongly agree	5. Agree somehow	6. Strongly agree	4. Agree a little	1.Strongly disagree	6. Strongly agree	6. Strongly agree	6. Strongly agree	Strongly agree	Strongly disagree	Moderately agree	Moderately agree	Strongly agree	Strongly agree	Slightly agree	Strongly disagree	Strongly disagree	Strongly disagree	Strongly disagree	Strongly agree	Strongly agree	Moderately agree	Strongly agree	Strongly disagree	Strongly agree	Strongly disagree	Yes
Female	22	K.N.U.S.T	Bsc Midwifery	2ND YEAR	CHRISTIANITY	1. Student	5. Agree somehow	1.Strongly disagree	1.Strongly disagree	2. Disagree somehow	1.Strongly disagree	1.Strongly disagree	4. Agree a little	1.Strongly disagree	1.Strongly disagree	5. Agree somehow	6. Strongly agree	3. Disagree a little	4. Agree a little	6. Strongly agree	6. Strongly agree	6. Strongly agree	5. Agree somehow	6. Strongly agree	6. Strongly agree	3. Disagree a little	2. Disagree somehow	5. Agree somehow	5. Agree somehow	6. Strongly agree	Slightly agree	Strongly disagree	Moderately agree	Moderately disagree	Strongly agree	Strongly agree	Strongly disagree	Slightly disagree	Slightly disagree	Slightly disagree	Strongly agree	Strongly agree	Strongly agree	Moderately agree	Strongly disagree	Strongly agree	Strongly agree	Moderately agree	Yes
Female	21	K.N.U.S.T	Bsc.Midwifery	2ND YEAR	CHRISTIANITY	1. Student	4. Agree a little	5. Agree somehow	3. Disagree a little	5. Agree somehow	4. Agree a little	2. Disagree somehow	4. Agree a little	1.Strongly disagree	4. Agree a little	6. Strongly agree	5. Agree somehow	1.Strongly disagree	4. Agree a little	5. Agree somehow	5. Agree somehow	5. Agree somehow	5. Agree somehow	5. Agree somehow	5. Agree somehow	5. Agree somehow	1.Strongly disagree	5. Agree somehow	4. Agree a little	5. Agree somehow	Strongly agree	Strongly agree	Moderately agree	Slightly agree	Moderately agree	Slightly agree	Strongly agree	Slightly disagree	Slightly agree	Slightly agree	Strongly agree	Moderately agree	Moderately agree	Slightly agree	Slightly disagree	Moderately agree	Strongly agree	Slightly agree	Yes
Female	22	K.N.U.S.T	Midwifery	2ND YEAR	CHRISTIANITY	1. Student	6. Strongly agree	1.Strongly disagree	1.Strongly disagree	1.Strongly disagree	1.Strongly disagree	1.Strongly disagree	1.Strongly disagree	1.Strongly disagree	1.Strongly disagree	6. Strongly agree	6. Strongly agree	1.Strongly disagree	6. Strongly agree	6. Strongly agree	6. Strongly agree	6. Strongly agree	6. Strongly agree	6. Strongly agree	6. Strongly agree	1.Strongly disagree	1.Strongly disagree	6. Strongly agree	6. Strongly agree	6. Strongly agree	Strongly agree	Strongly disagree	Strongly agree	Strongly disagree	Strongly agree	Strongly agree	Strongly agree	Strongly disagree	Slightly disagree	Slightly agree	Moderately agree	Strongly agree	Strongly agree	Moderately agree	Strongly disagree	Moderately agree	Strongly agree	Slightly agree	Yes
Male	23	K.N.U.S.T	Bsc Nursing	2ND YEAR	CHRISTIANITY	1. Student	1.Strongly disagree	1.Strongly disagree	1.Strongly disagree	1.Strongly disagree	1.Strongly disagree	1.Strongly disagree	5. Agree somehow	1.Strongly disagree	4. Agree a little	6. Strongly agree	6. Strongly agree	1.Strongly disagree	1.Strongly disagree	6. Strongly agree	6. Strongly agree	2. Disagree somehow	4. Agree a little	4. Agree a little	6. Strongly agree	4. Agree a little	5. Agree somehow	6. Strongly agree	6. Strongly agree	6. Strongly agree	Strongly agree	Moderately disagree	Moderately disagree	Moderately agree	Slightly agree	Strongly agree	Moderately agree	Slightly agree	Slightly agree	Slightly agree	Slightly agree	Strongly agree	Strongly agree	Moderately agree	Strongly agree	Slightly agree	Strongly agree	Moderately agree	No
Female	19years	K.N.U.S.T	Midwifery	2ND YEAR	CHRISTIANITY	1. Student	4. Agree a little	4. Agree a little	5. Agree somehow	5. Agree somehow	3. Disagree a little	4. Agree a little	3. Disagree a little	3. Disagree a little	4. Agree a little	4. Agree a little	5. Agree somehow	5. Agree somehow	4. Agree a little	4. Agree a little	4. Agree a little	4. Agree a little	4. Agree a little	4. Agree a little	4. Agree a little	5. Agree somehow	5. Agree somehow	5. Agree somehow	4. Agree a little	4. Agree a little	Moderately agree	Moderately agree	Moderately agree	Moderately agree	Slightly agree	Strongly agree	Moderately agree	Strongly agree	Slightly disagree	Slightly agree	Slightly agree	Slightly agree	Moderately agree	Slightly agree	Slightly agree	Slightly agree	Slightly agree	Slightly agree	Yes
Female	19years	K.N.U.S.T	Midwifery	2ND YEAR	CHRISTIANITY	1. Student	4. Agree a little	4. Agree a little	5. Agree somehow	5. Agree somehow	3. Disagree a little	4. Agree a little	3. Disagree a little	3. Disagree a little	4. Agree a little	4. Agree a little	5. Agree somehow	5. Agree somehow	4. Agree a little	4. Agree a little	4. Agree a little	4. Agree a little	4. Agree a little	4. Agree a little	4. Agree a little	5. Agree somehow	5. Agree somehow	5. Agree somehow	4. Agree a little	4. Agree a little	Moderately agree	Moderately agree	Moderately agree	Moderately agree	Slightly agree	Strongly agree	Moderately agree	Strongly agree	Slightly disagree	Slightly agree	Slightly agree	Slightly agree	Moderately agree	Slightly agree	Slightly agree	Slightly agree	Slightly agree	Slightly agree	Yes
Female	19yrs	K.N.U.S.T	Midwifery	2ND YEAR	CHRISTIANITY	1. Student	4. Agree a little	3. Disagree a little	1.Strongly disagree	3. Disagree a little	2. Disagree somehow	4. Agree a little	3. Disagree a little	1.Strongly disagree	4. Agree a little	4. Agree a little	4. Agree a little	3. Disagree a little	4. Agree a little	5. Agree somehow	6. Strongly agree	4. Agree a little	5. Agree somehow	5. Agree somehow	5. Agree somehow	3. Disagree a little	2. Disagree somehow	6. Strongly agree	5. Agree somehow	4. Agree a little	Moderately agree	Moderately disagree	Slightly agree	Moderately agree	Slightly agree	Moderately agree	Slightly agree	Slightly disagree	Slightly disagree	Slightly disagree	Slightly disagree	Slightly agree	Slightly agree	Slightly agree	Moderately disagree	Slightly disagree	Moderately agree	Slightly agree	Yes
Female	20	K.N.U.S.T	Nursing	2ND YEAR	CHRISTIANITY	1. Student	5. Agree somehow	1.Strongly disagree	1.Strongly disagree	3. Disagree a little	2. Disagree somehow	3. Disagree a little	1.Strongly disagree	1.Strongly disagree	4. Agree a little	6. Strongly agree	6. Strongly agree	1.Strongly disagree	4. Agree a little	6. Strongly agree	4. Agree a little	6. Strongly agree	6. Strongly agree	6. Strongly agree	6. Strongly agree	1.Strongly disagree	1.Strongly disagree	6. Strongly agree	6. Strongly agree	6. Strongly agree	Strongly agree	Strongly disagree	Moderately agree	Moderately agree	Moderately agree	Strongly agree	Moderately agree	Strongly agree	Slightly disagree	Slightly disagree	Moderately agree	Moderately agree	Strongly agree	Moderately agree	Strongly disagree	Moderately agree	Strongly agree	Slightly agree	Yes
Female	18	K.N.U.S.T	Bsc. Nursing	2ND YEAR	CHRISTIANITY	1. Student	6. Strongly agree	4. Agree a little	5. Agree somehow	2. Disagree somehow	1.Strongly disagree	5. Agree somehow	2. Disagree somehow	1.Strongly disagree	3. Disagree a little	6. Strongly agree	6. Strongly agree	5. Agree somehow	4. Agree a little	6. Strongly agree	5. Agree somehow	6. Strongly agree	5. Agree somehow	6. Strongly agree	6. Strongly agree	4. Agree a little	4. Agree a little	6. Strongly agree	6. Strongly agree	6. Strongly agree	Strongly agree	Slightly agree	Moderately disagree	Moderately agree	Strongly agree	Strongly agree	Moderately agree	Strongly agree	Slightly disagree	Slightly disagree	Slightly disagree	Strongly agree	Strongly agree	Moderately agree	Strongly agree	Strongly agree	Strongly agree	Strongly agree	Yes
Female	19	K.N.U.S.T	Midwifery	2ND YEAR	CHRISTIANITY	1. Student	1.Strongly disagree	1.Strongly disagree	5. Agree somehow	6. Strongly agree	1.Strongly disagree	1.Strongly disagree	4. Agree a little	3. Disagree a little	2. Disagree somehow	3. Disagree a little	6. Strongly agree	1.Strongly disagree	2. Disagree somehow	5. Agree somehow	4. Agree a little	5. Agree somehow	6. Strongly agree	6. Strongly agree	5. Agree somehow	6. Strongly agree	4. Agree a little	6. Strongly agree	6. Strongly agree	6. Strongly agree	Strongly agree	Moderately agree	Strongly disagree	Moderately disagree	Slightly agree	Strongly agree	Strongly agree	Moderately agree	Strongly agree	Moderately agree	Slightly agree	Slightly disagree	Strongly agree	Moderately agree	Strongly disagree	Moderately agree	Strongly agree	Moderately agree	No
Female	19	K.N.U.S.T	BSc Nursing	2ND YEAR	CHRISTIANITY	1. Student	6. Strongly agree	1.Strongly disagree	1.Strongly disagree	2. Disagree somehow	1.Strongly disagree	4. Agree a little	5. Agree somehow	1.Strongly disagree	1.Strongly disagree	5. Agree somehow	4. Agree a little	1.Strongly disagree	6. Strongly agree	6. Strongly agree	6. Strongly agree	2. Disagree somehow	6. Strongly agree	1.Strongly disagree	6. Strongly agree	4. Agree a little	6. Strongly agree	6. Strongly agree	6. Strongly agree	5. Agree somehow	Strongly agree	Moderately disagree	Moderately disagree	Slightly agree	Strongly agree	Strongly agree	Slightly agree	Moderately agree	Moderately disagree	Moderately disagree	Strongly disagree	Strongly agree	Strongly agree	Slightly disagree	Strongly agree	Strongly agree	Strongly agree	Moderately disagree	Yes
Female	20	K.N.U.S.T	Bsc.Midwifery	2ND YEAR	CHRISTIANITY	1. Student	5. Agree somehow	6. Strongly agree	2. Disagree somehow	5. Agree somehow	3. Disagree a little	6. Strongly agree	4. Agree a little	2. Disagree somehow	5. Agree somehow	6. Strongly agree	6. Strongly agree	2. Disagree somehow	6. Strongly agree	1.Strongly disagree	6. Strongly agree	4. Agree a little	6. Strongly agree	1.Strongly disagree	4. Agree a little	3. Disagree a little	5. Agree somehow	6. Strongly agree	6. Strongly agree	6. Strongly agree	Moderately agree	Strongly disagree	Moderately agree	Moderately agree	Strongly agree	Moderately agree	Moderately agree	Moderately disagree	Strongly disagree	Moderately agree	Strongly agree	Strongly agree	Strongly agree	Strongly agree	Moderately agree	Strongly disagree	Strongly agree	Moderately agree	No
Female	19	K.N.U.S.T	Bsc Midwifery	2ND YEAR	CHRISTIANITY	1. Student	4. Agree a little	2. Disagree somehow	3. Disagree a little	5. Agree somehow	5. Agree somehow	1.Strongly disagree	6. Strongly agree	1.Strongly disagree	6. Strongly agree	6. Strongly agree	6. Strongly agree	1.Strongly disagree	6. Strongly agree	6. Strongly agree	6. Strongly agree	1.Strongly disagree	6. Strongly agree	5. Agree somehow	6. Strongly agree	2. Disagree somehow	1.Strongly disagree	6. Strongly agree	6. Strongly agree	6. Strongly agree	Strongly agree	Strongly disagree	Slightly agree	Moderately disagree	Moderately agree	Moderately agree	Moderately disagree	Moderately disagree	Strongly disagree	Strongly disagree	Strongly disagree	Moderately agree	Moderately agree	Slightly agree	Moderately agree	Moderately agree	Moderately agree	Strongly disagree	Yes
Male	19	K.N.U.S.T	BSc. Nursing	2ND YEAR	CHRISTIANITY	1. Student	2. Disagree somehow	2. Disagree somehow	1.Strongly disagree	4. Agree a little	5. Agree somehow	6. Strongly agree	5. Agree somehow	5. Agree somehow	5. Agree somehow	6. Strongly agree	6. Strongly agree	1.Strongly disagree	5. Agree somehow	6. Strongly agree	6. Strongly agree	4. Agree a little	6. Strongly agree	6. Strongly agree	6. Strongly agree	5. Agree somehow	1.Strongly disagree	6. Strongly agree	5. Agree somehow	3. Disagree a little	Moderately agree	Strongly disagree	Slightly agree	Slightly disagree	Slightly agree	Slightly agree	Moderately disagree	Moderately disagree	Slightly disagree	Moderately disagree	Slightly agree	Strongly agree	Strongly agree	Moderately disagree	Slightly disagree	Slightly agree	Strongly agree	Slightly agree	No
Female	21	K.N.U.S.T	BSC Midwifery	2ND YEAR	CHRISTIANITY	1. Student	4. Agree a little	3. Disagree a little	1.Strongly disagree	5. Agree somehow	2. Disagree somehow	3. Disagree a little	5. Agree somehow	1.Strongly disagree	5. Agree somehow	6. Strongly agree	5. Agree somehow	2. Disagree somehow	4. Agree a little	5. Agree somehow	6. Strongly agree	5. Agree somehow	5. Agree somehow	5. Agree somehow	5. Agree somehow	4. Agree a little	4. Agree a little	4. Agree a little	5. Agree somehow	5. Agree somehow	Moderately agree	Slightly agree	Slightly agree	Slightly agree	Strongly agree	Moderately agree	Slightly agree	Slightly disagree	Slightly agree	Moderately agree	Moderately agree	Moderately agree	Moderately agree	Moderately agree	Slightly agree	Slightly agree	Strongly agree	Moderately agree	Yes
Female	20	K.N.U.S.T	Bsc nursing	2ND YEAR	CHRISTIANITY	1. Student	1.Strongly disagree	1.Strongly disagree	1.Strongly disagree	1.Strongly disagree	1.Strongly disagree	3. Disagree a little	4. Agree a little	1.Strongly disagree	1.Strongly disagree	6. Strongly agree	6. Strongly agree	1.Strongly disagree	3. Disagree a little	6. Strongly agree	6. Strongly agree	6. Strongly agree	6. Strongly agree	6. Strongly agree	6. Strongly agree	5. Agree somehow	1.Strongly disagree	6. Strongly agree	6. Strongly agree	6. Strongly agree	Strongly agree	Slightly agree	Slightly agree	Moderately agree	Strongly agree	Strongly agree	Moderately disagree	Slightly agree	Strongly disagree	Moderately agree	Moderately agree	Strongly agree	Strongly agree	Moderately agree	Moderately agree	Strongly agree	Strongly agree	Strongly agree	Yes
Male	20	K.N.U.S.T	BSC NURSING	2ND YEAR	CHRISTIANITY	1. Student	1.Strongly disagree	1.Strongly disagree	1.Strongly disagree	5. Agree somehow	1.Strongly disagree	1.Strongly disagree	5. Agree somehow	1.Strongly disagree	1.Strongly disagree	6. Strongly agree	6. Strongly agree	1.Strongly disagree	2. Disagree somehow	6. Strongly agree	6. Strongly agree	6. Strongly agree	6. Strongly agree	6. Strongly agree	6. Strongly agree	1.Strongly disagree	1.Strongly disagree	6. Strongly agree	6. Strongly agree	6. Strongly agree	Strongly agree	Strongly disagree	Moderately agree	Moderately disagree	Moderately agree	Slightly agree	Moderately agree	Moderately agree	Slightly agree	Moderately disagree	Moderately agree	Moderately agree	Moderately agree	Slightly disagree	Moderately agree	Strongly disagree	Strongly agree	Strongly disagree	No
Female	21	K.N.U.S.T	Bsc Midwifery	2ND YEAR	CHRISTIANITY	1. Student	3. Disagree a little	1.Strongly disagree	1.Strongly disagree	6. Strongly agree	6. Strongly agree	4. Agree a little	2. Disagree somehow	1.Strongly disagree	2. Disagree somehow	6. Strongly agree	6. Strongly agree	3. Disagree a little	6. Strongly agree	6. Strongly agree	6. Strongly agree	6. Strongly agree	4. Agree a little	6. Strongly agree	6. Strongly agree	1.Strongly disagree	2. Disagree somehow	6. Strongly agree	6. Strongly agree	6. Strongly agree	Moderately agree	Moderately disagree	Slightly agree	Strongly disagree	Strongly agree	Strongly agree	Strongly disagree	Slightly agree	Strongly disagree	Slightly disagree	Slightly agree	Slightly agree	Strongly agree	Moderately agree	Strongly agree	Moderately agree	Strongly agree	Strongly disagree	Yes
Male	21	K.N.U.S.T	Nursing	2ND YEAR	CHRISTIANITY	1. Student	5. Agree somehow	2. Disagree somehow	2. Disagree somehow	5. Agree somehow	2. Disagree somehow	1.Strongly disagree	2. Disagree somehow	1.Strongly disagree	2. Disagree somehow	6. Strongly agree	6. Strongly agree	1.Strongly disagree	5. Agree somehow	5. Agree somehow	6. Strongly agree	6. Strongly agree	6. Strongly agree	6. Strongly agree	6. Strongly agree	5. Agree somehow	1.Strongly disagree	6. Strongly agree	6. Strongly agree	6. Strongly agree	Strongly agree	Strongly disagree	Strongly agree	Strongly disagree	Strongly agree	Strongly agree	Moderately agree	Strongly agree	Slightly agree	Moderately agree	Slightly agree	Strongly agree	Strongly agree	Moderately agree	Strongly disagree	Strongly agree	Strongly agree	Moderately agree	No
Female	20	K.N.U.S.T	BSc midwifery	2ND YEAR	CHRISTIANITY	1. Student	4. Agree a little	3. Disagree a little	1.Strongly disagree	5. Agree somehow	5. Agree somehow	1.Strongly disagree	6. Strongly agree	1.Strongly disagree	5. Agree somehow	6. Strongly agree	6. Strongly agree	2. Disagree somehow	2. Disagree somehow	6. Strongly agree	6. Strongly agree	5. Agree somehow	5. Agree somehow	6. Strongly agree	6. Strongly agree	5. Agree somehow	1.Strongly disagree	6. Strongly agree	6. Strongly agree	6. Strongly agree	Strongly agree	Slightly agree	Moderately disagree	Slightly disagree	Moderately agree	Strongly agree	Slightly agree	Moderately agree	Slightly agree	Moderately agree	Moderately disagree	Strongly agree	Strongly agree	Strongly agree	Moderately agree	Slightly agree	Strongly agree	Moderately agree	Yes
Female	19	K.N.U.S.T	BSC MIDWIFERY	2ND YEAR	CHRISTIANITY	1. Student	5. Agree somehow	5. Agree somehow	1.Strongly disagree	4. Agree a little	1.Strongly disagree	1.Strongly disagree	4. Agree a little	1.Strongly disagree	5. Agree somehow	6. Strongly agree	6. Strongly agree	1.Strongly disagree	2. Disagree somehow	6. Strongly agree	6. Strongly agree	5. Agree somehow	5. Agree somehow	5. Agree somehow	6. Strongly agree	5. Agree somehow	5. Agree somehow	6. Strongly agree	6. Strongly agree	6. Strongly agree	Slightly agree	Moderately agree	Slightly agree	Slightly agree	Strongly agree	Moderately agree	Slightly agree	Slightly agree	Moderately disagree	Moderately agree	Slightly agree	Moderately agree	Slightly agree	Slightly agree	Slightly agree	Slightly disagree	Slightly agree	Slightly agree	Yes
Female	20	K.N.U.S.T	Midwifery	2ND YEAR	CHRISTIANITY	1. Student	6. Strongly agree	4. Agree a little	1.Strongly disagree	4. Agree a little	5. Agree somehow	4. Agree a little	4. Agree a little	1.Strongly disagree	3. Disagree a little	6. Strongly agree	6. Strongly agree	1.Strongly disagree	6. Strongly agree	6. Strongly agree	6. Strongly agree	6. Strongly agree	5. Agree somehow	4. Agree a little	6. Strongly agree	2. Disagree somehow	1.Strongly disagree	6. Strongly agree	6. Strongly agree	6. Strongly agree	Strongly agree	Strongly disagree	Slightly agree	Moderately disagree	Strongly agree	Strongly agree	Slightly agree	Slightly agree	Moderately disagree	Strongly disagree	Strongly disagree	Moderately agree	Moderately agree	Slightly agree	Slightly agree	Strongly disagree	Strongly agree	Slightly agree	Yes
Female	21	K.N.U.S.T	Bsc.midwifery	2ND YEAR	CHRISTIANITY	1. Student	2. Disagree somehow	1.Strongly disagree	1.Strongly disagree	5. Agree somehow	2. Disagree somehow	5. Agree somehow	5. Agree somehow	5. Agree somehow	5. Agree somehow	5. Agree somehow	5. Agree somehow	5. Agree somehow	3. Disagree a little	5. Agree somehow	5. Agree somehow	5. Agree somehow	5. Agree somehow	5. Agree somehow	5. Agree somehow	5. Agree somehow	5. Agree somehow	6. Strongly agree	6. Strongly agree	6. Strongly agree	Strongly agree	Moderately agree	Moderately agree	Moderately agree	Moderately agree	Strongly agree	Moderately agree	Moderately agree	Moderately agree	Moderately agree	Slightly agree	Moderately agree	Moderately agree	Moderately agree	Moderately agree	Moderately agree	Moderately agree	Moderately agree	Yes
Female	21	K.N.U.S.T	Nursing	2ND YEAR	CHRISTIANITY	1. Student	4. Agree a little	1.Strongly disagree	1.Strongly disagree	1.Strongly disagree	1.Strongly disagree	5. Agree somehow	4. Agree a little	1.Strongly disagree	3. Disagree a little	6. Strongly agree	6. Strongly agree	1.Strongly disagree	5. Agree somehow	6. Strongly agree	4. Agree a little	1.Strongly disagree	6. Strongly agree	6. Strongly agree	6. Strongly agree	5. Agree somehow	1.Strongly disagree	6. Strongly agree	6. Strongly agree	6. Strongly agree	Moderately agree	Slightly disagree	Slightly agree	Slightly agree	Slightly disagree	Moderately agree	Moderately agree	Slightly agree	Moderately disagree	Slightly disagree	Moderately agree	Moderately agree	Moderately agree	Slightly agree	Moderately disagree	Moderately disagree	Moderately agree	Moderately disagree	Yes
Female	18	K.N.U.S.T	nursing	2ND YEAR	CHRISTIANITY	1. Student	5. Agree somehow	1.Strongly disagree	1.Strongly disagree	3. Disagree a little	1.Strongly disagree	1.Strongly disagree	3. Disagree a little	1.Strongly disagree	1.Strongly disagree	4. Agree a little	2. Disagree somehow	1.Strongly disagree	6. Strongly agree	6. Strongly agree	6. Strongly agree	4. Agree a little	6. Strongly agree	5. Agree somehow	6. Strongly agree	1.Strongly disagree	3. Disagree a little	6. Strongly agree	4. Agree a little	6. Strongly agree	Slightly agree	Slightly disagree	Slightly agree	Slightly agree	Slightly agree	Slightly agree	Slightly agree	Strongly agree	Moderately disagree	Slightly disagree	Slightly agree	Moderately agree	Strongly agree	Slightly agree	Moderately disagree	Strongly agree	Strongly agree	Slightly agree	Yes
Female	23	K.N.U.S.T	Bsc. Nursing	2ND YEAR	CHRISTIANITY	1. Student	4. Agree a little	2. Disagree somehow	1.Strongly disagree	4. Agree a little	4. Agree a little	1.Strongly disagree	6. Strongly agree	1.Strongly disagree	4. Agree a little	6. Strongly agree	6. Strongly agree	1.Strongly disagree	5. Agree somehow	6. Strongly agree	6. Strongly agree	4. Agree a little	5. Agree somehow	6. Strongly agree	6. Strongly agree	5. Agree somehow	1.Strongly disagree	6. Strongly agree	6. Strongly agree	6. Strongly agree	Moderately disagree	Strongly disagree	Slightly disagree	Slightly disagree	Moderately agree	Moderately agree	Slightly disagree	Slightly disagree	Strongly disagree	Strongly disagree	Strongly disagree	Slightly disagree	Strongly agree	Slightly agree	Moderately disagree	Moderately agree	Strongly agree	Slightly disagree	Yes
Female	20	K.N.U.S.T	Degree Nursing	2ND YEAR	CHRISTIANITY	1. Student	1.Strongly disagree	1.Strongly disagree	6. Strongly agree	6. Strongly agree	1.Strongly disagree	6. Strongly agree	6. Strongly agree	1.Strongly disagree	4. Agree a little	6. Strongly agree	1.Strongly disagree	1.Strongly disagree	6. Strongly agree	1.Strongly disagree	6. Strongly agree	6. Strongly agree	6. Strongly agree	6. Strongly agree	6. Strongly agree	1.Strongly disagree	6. Strongly agree	6. Strongly agree	6. Strongly agree	6. Strongly agree	Strongly agree	Strongly disagree	Strongly disagree	Strongly agree	Strongly agree	Strongly disagree	Strongly disagree	Strongly disagree	Strongly disagree	Strongly disagree	Strongly agree	Strongly agree	Strongly agree	Strongly agree	Strongly disagree	Strongly agree	Strongly agree	Strongly disagree	Yes
Male	25	K.N.U.S.T	Nursing	2ND YEAR	CHRISTIANITY	1. Student	3. Disagree a little	1.Strongly disagree	1.Strongly disagree	6. Strongly agree	4. Agree a little	4. Agree a little	4. Agree a little	3. Disagree a little	4. Agree a little	4. Agree a little	4. Agree a little	4. Agree a little	3. Disagree a little	2. Disagree somehow	2. Disagree somehow	2. Disagree somehow	6. Strongly agree	5. Agree somehow	4. Agree a little	3. Disagree a little	5. Agree somehow	6. Strongly agree	6. Strongly agree	6. Strongly agree	Strongly agree	Moderately agree	Moderately agree	Slightly disagree	Strongly disagree	Moderately agree	Moderately agree	Moderately disagree	Slightly agree	Slightly agree	Moderately agree	Strongly agree	Strongly agree	Strongly agree	Strongly agree	Moderately disagree	Slightly disagree	Moderately disagree	No
Female	19	K.N.U.S.T	BSc.Nursing	2ND YEAR	CHRISTIANITY	1. Student	1.Strongly disagree	1.Strongly disagree	1.Strongly disagree	1.Strongly disagree	1.Strongly disagree	1.Strongly disagree	1.Strongly disagree	1.Strongly disagree	3. Disagree a little	5. Agree somehow	4. Agree a little	3. Disagree a little	6. Strongly agree	6. Strongly agree	6. Strongly agree	3. Disagree a little	6. Strongly agree	6. Strongly agree	6. Strongly agree	2. Disagree somehow	3. Disagree a little	6. Strongly agree	6. Strongly agree	6. Strongly agree	Moderately agree	Slightly disagree	Slightly disagree	Slightly disagree	Strongly agree	Strongly agree	Slightly agree	Moderately agree	Slightly disagree	Slightly disagree	Slightly disagree	Moderately agree	Strongly agree	Slightly disagree	Slightly disagree	Slightly disagree	Strongly agree	Moderately disagree	No
Female	20	K.N.U.S.T	Midwifery	2ND YEAR	CHRISTIANITY	1. Student	6. Strongly agree	3. Disagree a little	1.Strongly disagree	1.Strongly disagree	1.Strongly disagree	1.Strongly disagree	6. Strongly agree	1.Strongly disagree	1.Strongly disagree	5. Agree somehow	6. Strongly agree	6. Strongly agree	2. Disagree somehow	6. Strongly agree	6. Strongly agree	6. Strongly agree	6. Strongly agree	5. Agree somehow	6. Strongly agree	1.Strongly disagree	5. Agree somehow	4. Agree a little	5. Agree somehow	5. Agree somehow	Slightly agree	Strongly disagree	Strongly disagree	Slightly disagree	Slightly disagree	Slightly agree	Slightly agree	Slightly disagree	Strongly disagree	Slightly agree	Strongly agree	Strongly agree	Moderately agree	Moderately disagree	Strongly disagree	Slightly agree	Slightly agree	Moderately agree	Yes
Female	20	K.N.U.S.T	Bsc Nursing	2ND YEAR	CHRISTIANITY	1. Student	5. Agree somehow	4. Agree a little	5. Agree somehow	5. Agree somehow	5. Agree somehow	2. Disagree somehow	5. Agree somehow	1.Strongly disagree	1.Strongly disagree	6. Strongly agree	4. Agree a little	5. Agree somehow	2. Disagree somehow	5. Agree somehow	5. Agree somehow	5. Agree somehow	4. Agree a little	4. Agree a little	5. Agree somehow	4. Agree a little	6. Strongly agree	6. Strongly agree	6. Strongly agree	6. Strongly agree	Strongly agree	Moderately agree	Slightly agree	Slightly agree	Moderately agree	Slightly agree	Moderately agree	Moderately agree	Slightly disagree	Moderately disagree	Moderately disagree	Moderately agree	Moderately agree	Strongly agree	Moderately agree	Slightly agree	Slightly agree	Moderately disagree	Yes
Female	20	K.N.U.S.T	Midwifery	2ND YEAR	CHRISTIANITY	1. Student	1.Strongly disagree	5. Agree somehow	1.Strongly disagree	2. Disagree somehow	2. Disagree somehow	4. Agree a little	4. Agree a little	4. Agree a little	3. Disagree a little	4. Agree a little	4. Agree a little	4. Agree a little	4. Agree a little	4. Agree a little	4. Agree a little	4. Agree a little	4. Agree a little	5. Agree somehow	4. Agree a little	4. Agree a little	5. Agree somehow	4. Agree a little	4. Agree a little	4. Agree a little	Slightly agree	Slightly agree	Slightly agree	Slightly agree	Slightly agree	Slightly agree	Slightly agree	Slightly agree	Slightly agree	Slightly agree	Slightly agree	Slightly agree	Slightly agree	Slightly agree	Slightly agree	Slightly agree	Slightly agree	Slightly agree	Yes
Female	20	K.N.U.S.T	Midwifery	2ND YEAR	CHRISTIANITY	1. Student	1.Strongly disagree	4. Agree a little	1.Strongly disagree	4. Agree a little	5. Agree somehow	4. Agree a little	4. Agree a little	1.Strongly disagree	4. Agree a little	6. Strongly agree	6. Strongly agree	1.Strongly disagree	6. Strongly agree	6. Strongly agree	6. Strongly agree	5. Agree somehow	6. Strongly agree	6. Strongly agree	6. Strongly agree	5. Agree somehow	1.Strongly disagree	6. Strongly agree	6. Strongly agree	6. Strongly agree	Strongly agree	Strongly disagree	Moderately agree	Slightly disagree	Strongly agree	Strongly agree	Moderately agree	Slightly agree	Strongly disagree	Moderately disagree	Moderately disagree	Moderately agree	Moderately agree	Slightly agree	Slightly agree	Moderately disagree	Moderately agree	Slightly agree	Yes
Female	19	K.N.U.S.T	Nursing	2ND YEAR	CHRISTIANITY	1. Student	3. Disagree a little	1.Strongly disagree	1.Strongly disagree	2. Disagree somehow	2. Disagree somehow	1.Strongly disagree	6. Strongly agree	2. Disagree somehow	4. Agree a little	6. Strongly agree	6. Strongly agree	1.Strongly disagree	6. Strongly agree	6. Strongly agree	6. Strongly agree	4. Agree a little	6. Strongly agree	6. Strongly agree	5. Agree somehow	5. Agree somehow	1.Strongly disagree	6. Strongly agree	4. Agree a little	5. Agree somehow	Strongly agree	Slightly agree	Moderately agree	Moderately agree	Strongly agree	Strongly disagree	Slightly agree	Slightly disagree	Strongly disagree	Slightly disagree	Strongly disagree	Strongly agree	Strongly agree	Slightly disagree	Slightly agree	Strongly disagree	Strongly agree	Slightly disagree	Yes
Male	29	K.N.U.S.T	Emergency nursing	3RD YEAR	CHRISTIANITY	5. Health Professional/ Allied health Professional	6. Strongly agree	6. Strongly agree	1.Strongly disagree	1.Strongly disagree	1.Strongly disagree	1.Strongly disagree	1.Strongly disagree	1.Strongly disagree	1.Strongly disagree	6. Strongly agree	4. Agree a little	1.Strongly disagree	3. Disagree a little	6. Strongly agree	6. Strongly agree	6. Strongly agree	6. Strongly agree	6. Strongly agree	6. Strongly agree	2. Disagree somehow	2. Disagree somehow	6. Strongly agree	6. Strongly agree	6. Strongly agree	Strongly agree	Strongly disagree	Moderately agree	Slightly disagree	Strongly agree	Strongly agree	Moderately agree	Moderately agree	Moderately disagree	Slightly agree	Moderately disagree	Moderately agree	Strongly agree	Moderately agree	Slightly disagree	Slightly disagree	Strongly agree	Strongly agree	Yes
Female	21	K.N.U.S.T	Bsc nursing	2ND YEAR	CHRISTIANITY	1. Student	2. Disagree somehow	1.Strongly disagree	1.Strongly disagree	1.Strongly disagree	1.Strongly disagree	1.Strongly disagree	1.Strongly disagree	1.Strongly disagree	1.Strongly disagree	1.Strongly disagree	1.Strongly disagree	1.Strongly disagree	1.Strongly disagree	1.Strongly disagree	1.Strongly disagree	1.Strongly disagree	1.Strongly disagree	1.Strongly disagree	1.Strongly disagree	1.Strongly disagree	1.Strongly disagree	1.Strongly disagree	1.Strongly disagree	1.Strongly disagree	Slightly agree	Slightly disagree	Slightly agree	Slightly disagree	Slightly agree	Slightly disagree	Slightly agree	Slightly disagree	Slightly agree	Slightly disagree	Moderately disagree	Slightly agree	Slightly disagree	Slightly agree	Slightly disagree	Slightly agree	Slightly disagree	Slightly disagree	No
Female	21	K.N.U.S.T	Midwifery	2ND YEAR	CHRISTIANITY	1. Student	5. Agree somehow	2. Disagree somehow	1.Strongly disagree	4. Agree a little	6. Strongly agree	2. Disagree somehow	5. Agree somehow	5. Agree somehow	3. Disagree a little	6. Strongly agree	5. Agree somehow	1.Strongly disagree	3. Disagree a little	6. Strongly agree	5. Agree somehow	4. Agree a little	6. Strongly agree	6. Strongly agree	6. Strongly agree	4. Agree a little	5. Agree somehow	5. Agree somehow	2. Disagree somehow	4. Agree a little	Slightly agree	Slightly disagree	Moderately disagree	Slightly agree	Strongly agree	Slightly disagree	Slightly agree	Strongly disagree	Strongly disagree	Strongly disagree	Slightly disagree	Moderately disagree	Moderately agree	Slightly agree	Slightly disagree	Slightly agree	Moderately agree	Slightly agree	No
Female	21	K.N.U.S.T	Bsc nursing	2ND YEAR	CHRISTIANITY	1. Student	1.Strongly disagree	1.Strongly disagree	1.Strongly disagree	2. Disagree somehow	2. Disagree somehow	2. Disagree somehow	2. Disagree somehow	2. Disagree somehow	3. Disagree a little	5. Agree somehow	6. Strongly agree	1.Strongly disagree	1.Strongly disagree	6. Strongly agree	6. Strongly agree	4. Agree a little	6. Strongly agree	6. Strongly agree	6. Strongly agree	4. Agree a little	3. Disagree a little	4. Agree a little	4. Agree a little	5. Agree somehow	Slightly agree	Slightly disagree	Moderately disagree	Slightly disagree	Slightly disagree	Moderately disagree	Slightly disagree	Slightly agree	Strongly disagree	Strongly disagree	Strongly disagree	Strongly agree	Strongly agree	Slightly disagree	Strongly agree	Strongly agree	Strongly agree	Slightly agree	No
Female	20	K.N.U.S.T	Midwifery	2ND YEAR	CHRISTIANITY	1. Student	6. Strongly agree	4. Agree a little	5. Agree somehow	4. Agree a little	6. Strongly agree	6. Strongly agree	5. Agree somehow	1.Strongly disagree	2. Disagree somehow	6. Strongly agree	6. Strongly agree	5. Agree somehow	5. Agree somehow	6. Strongly agree	5. Agree somehow	6. Strongly agree	6. Strongly agree	6. Strongly agree	6. Strongly agree	6. Strongly agree	5. Agree somehow	6. Strongly agree	5. Agree somehow	6. Strongly agree	Moderately agree	Slightly disagree	Slightly disagree	Moderately agree	Moderately disagree	Strongly agree	Moderately agree	Moderately agree	Slightly agree	Moderately agree	Moderately agree	Moderately agree	Strongly agree	Moderately agree	Moderately agree	Slightly disagree	Strongly agree	Moderately agree	Yes
Female	38 years	K.N.U.S.T	BSc. Midwifery	2ND YEAR	CHRISTIANITY	1. Student	4. Agree a little	2. Disagree somehow	1.Strongly disagree	4. Agree a little	1.Strongly disagree	1.Strongly disagree	5. Agree somehow	1.Strongly disagree	2. Disagree somehow	6. Strongly agree	6. Strongly agree	1.Strongly disagree	2. Disagree somehow	6. Strongly agree	6. Strongly agree	5. Agree somehow	6. Strongly agree	6. Strongly agree	6. Strongly agree	5. Agree somehow	1.Strongly disagree	6. Strongly agree	6. Strongly agree	6. Strongly agree	Moderately agree	Strongly disagree	Slightly agree	Moderately disagree	Strongly agree	Strongly agree	Moderately agree	Moderately agree	Moderately disagree	Slightly agree	Strongly disagree	Moderately agree	Strongly agree	Strongly agree	Strongly disagree	Strongly disagree	Strongly agree	Slightly agree	Yes
Male	20	K.N.U.S.T	Bsc nursing	2ND YEAR	CHRISTIANITY	1. Student	3. Disagree a little	4. Agree a little	3. Disagree a little	3. Disagree a little	4. Agree a little	3. Disagree a little	5. Agree somehow	3. Disagree a little	4. Agree a little	3. Disagree a little	5. Agree somehow	2. Disagree somehow	3. Disagree a little	6. Strongly agree	3. Disagree a little	4. Agree a little	6. Strongly agree	4. Agree a little	5. Agree somehow	5. Agree somehow	1.Strongly disagree	3. Disagree a little	5. Agree somehow	5. Agree somehow	Strongly agree	Moderately disagree	Slightly agree	Slightly agree	Slightly disagree	Moderately agree	Slightly disagree	Moderately agree	Moderately disagree	Slightly agree	Moderately disagree	Moderately agree	Moderately agree	Slightly agree	Slightly agree	Moderately disagree	Moderately agree	Slightly disagree	No
Female	21	K.N.U.S.T	Midwifery	2ND YEAR	CHRISTIANITY	1. Student	6. Strongly agree	2. Disagree somehow	1.Strongly disagree	2. Disagree somehow	6. Strongly agree	4. Agree a little	2. Disagree somehow	1.Strongly disagree	2. Disagree somehow	6. Strongly agree	4. Agree a little	1.Strongly disagree	1.Strongly disagree	6. Strongly agree	6. Strongly agree	6. Strongly agree	6. Strongly agree	6. Strongly agree	6. Strongly agree	4. Agree a little	1.Strongly disagree	6. Strongly agree	6. Strongly agree	6. Strongly agree	Strongly agree	Moderately disagree	Moderately agree	Slightly agree	Moderately agree	Strongly agree	Moderately agree	Moderately agree	Slightly disagree	Slightly disagree	Slightly agree	Moderately agree	Strongly agree	Moderately agree	Moderately disagree	Moderately agree	Strongly agree	Moderately agree	Yes
Female	30	K.N.U.S.T	Bsc emergency nursing	3RD YEAR	CHRISTIANITY	1. Student	6. Strongly agree	6. Strongly agree	1.Strongly disagree	4. Agree a little	1.Strongly disagree	1.Strongly disagree	3. Disagree a little	1.Strongly disagree	1.Strongly disagree	6. Strongly agree	6. Strongly agree	2. Disagree somehow	4. Agree a little	6. Strongly agree	6. Strongly agree	6. Strongly agree	6. Strongly agree	6. Strongly agree	6. Strongly agree	1.Strongly disagree	1.Strongly disagree	6. Strongly agree	6. Strongly agree	6. Strongly agree	Slightly disagree	Slightly agree	Strongly agree	Slightly agree	Strongly agree	Moderately agree	Strongly disagree	Strongly agree	Strongly disagree	Strongly disagree	Moderately agree	Strongly agree	Strongly agree	Moderately agree	Moderately agree	Strongly disagree	Strongly agree	Slightly disagree	Yes
Male	36	K.N.U.S.T	Bsc emergency nursing	3RD YEAR	CHRISTIANITY	5. Health Professional/ Allied health Professional	6. Strongly agree	6. Strongly agree	1.Strongly disagree	3. Disagree a little	1.Strongly disagree	1.Strongly disagree	4. Agree a little	1.Strongly disagree	1.Strongly disagree	6. Strongly agree	6. Strongly agree	1.Strongly disagree	6. Strongly agree	6. Strongly agree	6. Strongly agree	6. Strongly agree	6. Strongly agree	6. Strongly agree	6. Strongly agree	5. Agree somehow	1.Strongly disagree	6. Strongly agree	6. Strongly agree	6. Strongly agree	Strongly agree	Strongly disagree	Strongly disagree	Slightly agree	Strongly agree	Strongly agree	Moderately agree	Slightly agree	Strongly disagree	Strongly disagree	Strongly disagree	Strongly agree	Strongly agree	Strongly agree	Slightly agree	Strongly disagree	Strongly agree	Strongly agree	Yes
Female	21	K.N.U.S.T	Nursing	2ND YEAR	CHRISTIANITY	1. Student	4. Agree a little	2. Disagree somehow	1.Strongly disagree	3. Disagree a little	3. Disagree a little	3. Disagree a little	2. Disagree somehow	1.Strongly disagree	2. Disagree somehow	6. Strongly agree	6. Strongly agree	1.Strongly disagree	5. Agree somehow	6. Strongly agree	5. Agree somehow	4. Agree a little	4. Agree a little	4. Agree a little	5. Agree somehow	2. Disagree somehow	5. Agree somehow	6. Strongly agree	6. Strongly agree	6. Strongly agree	Slightly agree	Moderately disagree	Moderately agree	Slightly agree	Moderately disagree	Moderately agree	Moderately agree	Moderately disagree	Strongly disagree	Strongly disagree	Moderately agree	Strongly agree	Moderately agree	Moderately disagree	Moderately disagree	Moderately disagree	Strongly agree	Moderately disagree	No
Female	32years	K.N.U.S.T	Bsc.Emergency nursing	3RD YEAR	CHRISTIANITY	5. Health Professional/ Allied health Professional	4. Agree a little	1.Strongly disagree	1.Strongly disagree	5. Agree somehow	1.Strongly disagree	1.Strongly disagree	6. Strongly agree	1.Strongly disagree	4. Agree a little	6. Strongly agree	6. Strongly agree	2. Disagree somehow	6. Strongly agree	6. Strongly agree	6. Strongly agree	5. Agree somehow	6. Strongly agree	5. Agree somehow	6. Strongly agree	5. Agree somehow	1.Strongly disagree	6. Strongly agree	6. Strongly agree	6. Strongly agree	Moderately agree	Strongly disagree	Moderately agree	Slightly agree	Strongly agree	Strongly agree	Slightly disagree	Moderately agree	Moderately agree	Moderately agree	Strongly agree	Strongly agree	Strongly agree	Moderately agree	Moderately disagree	Moderately agree	Strongly agree	Moderately disagree	Yes
Female	20	K.N.U.S.T	Bsc.miwifery	2ND YEAR	CHRISTIANITY	1. Student	5. Agree somehow	1.Strongly disagree	1.Strongly disagree	2. Disagree somehow	2. Disagree somehow	1.Strongly disagree	1.Strongly disagree	1.Strongly disagree	1.Strongly disagree	6. Strongly agree	6. Strongly agree	1.Strongly disagree	1.Strongly disagree	6. Strongly agree	6. Strongly agree	6. Strongly agree	6. Strongly agree	6. Strongly agree	6. Strongly agree	1.Strongly disagree	1.Strongly disagree	6. Strongly agree	6. Strongly agree	6. Strongly agree	Strongly agree	Moderately agree	Strongly disagree	Strongly disagree	Strongly disagree	Strongly agree	Moderately agree	Strongly agree	Strongly disagree	Strongly disagree	Strongly disagree	Strongly disagree	Strongly agree	Strongly disagree	Strongly disagree	Strongly agree	Strongly agree	Strongly agree	Yes
Female	19	K.N.U.S.T	Bsc Midwifery	2ND YEAR	CHRISTIANITY	1. Student	3. Disagree a little	5. Agree somehow	1.Strongly disagree	4. Agree a little	2. Disagree somehow	2. Disagree somehow	3. Disagree a little	1.Strongly disagree	2. Disagree somehow	6. Strongly agree	6. Strongly agree	2. Disagree somehow	3. Disagree a little	6. Strongly agree	6. Strongly agree	5. Agree somehow	5. Agree somehow	2. Disagree somehow	5. Agree somehow	3. Disagree a little	5. Agree somehow	6. Strongly agree	6. Strongly agree	3. Disagree a little	Moderately agree	Strongly disagree	Slightly agree	Slightly agree	Strongly agree	Moderately agree	Slightly agree	Slightly agree	Strongly disagree	Strongly disagree	Strongly disagree	Moderately agree	Strongly agree	Slightly agree	Moderately agree	Slightly disagree	Moderately agree	Slightly agree	No
Female	19	K.N.U.S.T	Bsc Nursing	2ND YEAR	CHRISTIANITY	1. Student	6. Strongly agree	1.Strongly disagree	1.Strongly disagree	4. Agree a little	4. Agree a little	1.Strongly disagree	4. Agree a little	1.Strongly disagree	1.Strongly disagree	1.Strongly disagree	6. Strongly agree	1.Strongly disagree	3. Disagree a little	6. Strongly agree	6. Strongly agree	6. Strongly agree	6. Strongly agree	6. Strongly agree	6. Strongly agree	4. Agree a little	4. Agree a little	6. Strongly agree	6. Strongly agree	6. Strongly agree	Slightly agree	Slightly disagree	Slightly agree	Slightly agree	Strongly agree	Strongly agree	Slightly agree	Slightly agree	Slightly agree	Slightly agree	Slightly agree	Slightly agree	Moderately agree	Slightly agree	Slightly agree	Slightly agree	Moderately agree	Moderately agree	Yes
Male	21	K.N.U.S.T	Nursing	2ND YEAR	CHRISTIANITY	1. Student	4. Agree a little	4. Agree a little	1.Strongly disagree	1.Strongly disagree	1.Strongly disagree	2. Disagree somehow	2. Disagree somehow	3. Disagree a little	2. Disagree somehow	6. Strongly agree	6. Strongly agree	3. Disagree a little	2. Disagree somehow	5. Agree somehow	4. Agree a little	3. Disagree a little	5. Agree somehow	5. Agree somehow	6. Strongly agree	6. Strongly agree	6. Strongly agree	6. Strongly agree	6. Strongly agree	5. Agree somehow	Slightly disagree	Strongly disagree	Strongly agree	Slightly agree	Slightly disagree	Strongly agree	Slightly agree	Moderately agree	Slightly disagree	Moderately agree	Strongly agree	Slightly disagree	Moderately agree	Moderately agree	Moderately agree	Moderately disagree	Strongly agree	Slightly agree	Yes
Male	23	K.N.U.S.T	Bsc.Nursing	2ND YEAR	CHRISTIANITY	1. Student	2. Disagree somehow	5. Agree somehow	2. Disagree somehow	5. Agree somehow	1.Strongly disagree	6. Strongly agree	6. Strongly agree	1.Strongly disagree	5. Agree somehow	6. Strongly agree	6. Strongly agree	1.Strongly disagree	5. Agree somehow	6. Strongly agree	6. Strongly agree	6. Strongly agree	6. Strongly agree	6. Strongly agree	6. Strongly agree	1.Strongly disagree	1.Strongly disagree	6. Strongly agree	6. Strongly agree	6. Strongly agree	Strongly agree	Strongly disagree	Strongly agree	Strongly agree	Strongly agree	Strongly agree	Strongly agree	Strongly agree	Moderately agree	Strongly agree	Strongly agree	Strongly agree	Strongly agree	Strongly agree	Slightly agree	Strongly agree	Strongly agree	Strongly agree	Yes
Male	18	K.N.U.S.T	Human Biology	1ST YEAR	CHRISTIANITY	1. Student	1.Strongly disagree	1.Strongly disagree	1.Strongly disagree	1.Strongly disagree	4. Agree a little	5. Agree somehow	4. Agree a little	4. Agree a little	4. Agree a little	6. Strongly agree	4. Agree a little	1.Strongly disagree	1.Strongly disagree	6. Strongly agree	4. Agree a little	6. Strongly agree	6. Strongly agree	6. Strongly agree	6. Strongly agree	1.Strongly disagree	1.Strongly disagree	6. Strongly agree	5. Agree somehow	4. Agree a little	Moderately agree	Strongly disagree	Strongly disagree	Strongly disagree	Strongly disagree	Slightly agree	Slightly agree	Slightly agree	Moderately agree	Slightly agree	Strongly agree	Strongly agree	Strongly agree	Moderately disagree	Strongly disagree	Slightly agree	Strongly agree	Strongly disagree	No
Female	19	K.N.U.S.T	Medicine	1ST YEAR	CHRISTIANITY	1. Student	4. Agree a little	1.Strongly disagree	1.Strongly disagree	1.Strongly disagree	1.Strongly disagree	1.Strongly disagree	5. Agree somehow	1.Strongly disagree	1.Strongly disagree	6. Strongly agree	6. Strongly agree	2. Disagree somehow	1.Strongly disagree	6. Strongly agree	6. Strongly agree	6. Strongly agree	6. Strongly agree	6. Strongly agree	6. Strongly agree	1.Strongly disagree	1.Strongly disagree	6. Strongly agree	6. Strongly agree	6. Strongly agree	Strongly agree	Slightly agree	Slightly agree	Slightly disagree	Strongly agree	Strongly agree	Strongly disagree	Strongly disagree	Strongly disagree	Strongly disagree	Strongly disagree	Slightly agree	Slightly agree	Slightly agree	Strongly agree	Strongly agree	Strongly agree	Moderately agree	Yes
Female	19	K.N.U.S.T	Human biology (medicine )	1ST YEAR	CHRISTIANITY	1. Student	5. Agree somehow	3. Disagree a little	4. Agree a little	3. Disagree a little	2. Disagree somehow	3. Disagree a little	6. Strongly agree	1.Strongly disagree	4. Agree a little	6. Strongly agree	6. Strongly agree	5. Agree somehow	6. Strongly agree	6. Strongly agree	6. Strongly agree	6. Strongly agree	5. Agree somehow	6. Strongly agree	6. Strongly agree	4. Agree a little	2. Disagree somehow	5. Agree somehow	6. Strongly agree	5. Agree somehow	Strongly agree	Slightly disagree	Moderately agree	Slightly disagree	Strongly agree	Strongly agree	Moderately agree	Strongly disagree	Strongly disagree	Strongly agree	Strongly disagree	Moderately agree	Strongly agree	Moderately agree	Slightly disagree	Moderately agree	Moderately agree	Moderately agree	Yes
Female	18	K.N.U.S.T	Medicine	1ST YEAR	CHRISTIANITY	1. Student	3. Disagree a little	2. Disagree somehow	1.Strongly disagree	1.Strongly disagree	1.Strongly disagree	1.Strongly disagree	6. Strongly agree	1.Strongly disagree	1.Strongly disagree	6. Strongly agree	5. Agree somehow	1.Strongly disagree	2. Disagree somehow	6. Strongly agree	6. Strongly agree	6. Strongly agree	6. Strongly agree	6. Strongly agree	6. Strongly agree	5. Agree somehow	5. Agree somehow	6. Strongly agree	6. Strongly agree	6. Strongly agree	Strongly agree	Slightly disagree	Slightly disagree	Slightly disagree	Strongly disagree	Strongly agree	Strongly disagree	Slightly disagree	Slightly agree	Strongly disagree	Slightly disagree	Strongly agree	Strongly agree	Slightly disagree	Strongly agree	Strongly agree	Strongly agree	Moderately disagree	Yes
Female	19	K.N.U.S.T	Human Biology	1ST YEAR	CHRISTIANITY	1. Student	6. Strongly agree	2. Disagree somehow	1.Strongly disagree	2. Disagree somehow	5. Agree somehow	2. Disagree somehow	6. Strongly agree	1.Strongly disagree	4. Agree a little	6. Strongly agree	6. Strongly agree	1.Strongly disagree	6. Strongly agree	6. Strongly agree	6. Strongly agree	6. Strongly agree	5. Agree somehow	4. Agree a little	6. Strongly agree	5. Agree somehow	2. Disagree somehow	6. Strongly agree	6. Strongly agree	6. Strongly agree	Moderately agree	Slightly disagree	Strongly disagree	Moderately disagree	Moderately agree	Moderately agree	Slightly agree	Moderately agree	Moderately disagree	Moderately disagree	Moderately disagree	Strongly agree	Strongly agree	Slightly agree	Strongly disagree	Slightly agree	Strongly agree	Moderately disagree	Yes
Female	19	K.N.U.S.T	Medicine	1ST YEAR	CHRISTIANITY	1. Student	3. Disagree a little	1.Strongly disagree	1.Strongly disagree	1.Strongly disagree	1.Strongly disagree	1.Strongly disagree	6. Strongly agree	1.Strongly disagree	1.Strongly disagree	6. Strongly agree	6. Strongly agree	1.Strongly disagree	6. Strongly agree	6. Strongly agree	6. Strongly agree	1.Strongly disagree	6. Strongly agree	5. Agree somehow	6. Strongly agree	1.Strongly disagree	1.Strongly disagree	6. Strongly agree	6. Strongly agree	6. Strongly agree	Strongly agree	Strongly disagree	Strongly disagree	Moderately agree	Slightly agree	Moderately agree	Moderately agree	Slightly agree	Strongly disagree	Strongly disagree	Strongly disagree	Slightly agree	Slightly agree	Slightly agree	Slightly agree	Slightly agree	Strongly agree	Strongly disagree	Yes
Female	18	K.N.U.S.T	Human Biology	1ST YEAR	CHRISTIANITY	1. Student	5. Agree somehow	5. Agree somehow	1.Strongly disagree	1.Strongly disagree	1.Strongly disagree	1.Strongly disagree	1.Strongly disagree	1.Strongly disagree	1.Strongly disagree	6. Strongly agree	6. Strongly agree	1.Strongly disagree	6. Strongly agree	6. Strongly agree	6. Strongly agree	4. Agree a little	6. Strongly agree	6. Strongly agree	6. Strongly agree	3. Disagree a little	2. Disagree somehow	6. Strongly agree	6. Strongly agree	6. Strongly agree	Moderately agree	Moderately disagree	Moderately disagree	Strongly disagree	Strongly agree	Strongly agree	Moderately disagree	Moderately disagree	Strongly disagree	Slightly disagree	Moderately disagree	Moderately disagree	Strongly agree	Slightly disagree	Slightly agree	Moderately agree	Strongly agree	Moderately disagree	No
Female	18	K.N.U.S.T	Human Biology, Medicine	1ST YEAR	CHRISTIANITY	1. Student	5. Agree somehow	1.Strongly disagree	1.Strongly disagree	5. Agree somehow	1.Strongly disagree	4. Agree a little	6. Strongly agree	1.Strongly disagree	5. Agree somehow	6. Strongly agree	6. Strongly agree	1.Strongly disagree	6. Strongly agree	6. Strongly agree	5. Agree somehow	5. Agree somehow	5. Agree somehow	5. Agree somehow	6. Strongly agree	1.Strongly disagree	1.Strongly disagree	6. Strongly agree	6. Strongly agree	6. Strongly agree	Strongly agree	Strongly disagree	Strongly disagree	Moderately agree	Strongly agree	Moderately agree	Moderately agree	Moderately disagree	Moderately agree	Strongly disagree	Strongly disagree	Slightly agree	Strongly agree	Slightly agree	Strongly disagree	Strongly disagree	Strongly agree	Slightly agree	Yes
Female	18	K.N.U.S.T	Human Biology	1ST YEAR	CHRISTIANITY	1. Student	3. Disagree a little	2. Disagree somehow	2. Disagree somehow	3. Disagree a little	4. Agree a little	3. Disagree a little	4. Agree a little	1.Strongly disagree	2. Disagree somehow	6. Strongly agree	6. Strongly agree	2. Disagree somehow	5. Agree somehow	6. Strongly agree	6. Strongly agree	4. Agree a little	4. Agree a little	5. Agree somehow	5. Agree somehow	4. Agree a little	2. Disagree somehow	5. Agree somehow	5. Agree somehow	6. Strongly agree	Strongly agree	Moderately disagree	Slightly disagree	Moderately agree	Moderately agree	Moderately agree	Slightly agree	Moderately agree	Slightly agree	Slightly disagree	Slightly disagree	Strongly agree	Strongly agree	Slightly disagree	Moderately disagree	Strongly disagree	Strongly agree	Slightly disagree	Yes
Female	18	K.N.U.S.T	Human Biology	1ST YEAR	CHRISTIANITY	1. Student	2. Disagree somehow	4. Agree a little	4. Agree a little	2. Disagree somehow	3. Disagree a little	3. Disagree a little	1.Strongly disagree	1.Strongly disagree	1.Strongly disagree	6. Strongly agree	6. Strongly agree	1.Strongly disagree	6. Strongly agree	6. Strongly agree	6. Strongly agree	6. Strongly agree	5. Agree somehow	5. Agree somehow	6. Strongly agree	4. Agree a little	1.Strongly disagree	6. Strongly agree	6. Strongly agree	6. Strongly agree	Strongly agree	Strongly disagree	Moderately agree	Moderately agree	Strongly agree	Moderately agree	Strongly agree	Slightly agree	Strongly agree	Slightly agree	Slightly agree	Strongly agree	Moderately agree	Slightly agree	Strongly disagree	Slightly agree	Strongly agree	Slightly agree	No
Female	19	K.N.U.S.T	Human Biology	1ST YEAR	CHRISTIANITY	1. Student	5. Agree somehow	1.Strongly disagree	1.Strongly disagree	4. Agree a little	1.Strongly disagree	1.Strongly disagree	3. Disagree a little	1.Strongly disagree	1.Strongly disagree	6. Strongly agree	6. Strongly agree	2. Disagree somehow	6. Strongly agree	6. Strongly agree	6. Strongly agree	6. Strongly agree	4. Agree a little	3. Disagree a little	6. Strongly agree	5. Agree somehow	4. Agree a little	6. Strongly agree	6. Strongly agree	6. Strongly agree	Strongly agree	Slightly agree	Moderately disagree	Slightly disagree	Moderately disagree	Moderately agree	Moderately agree	Moderately agree	Moderately disagree	Moderately disagree	Strongly disagree	Strongly agree	Moderately agree	Moderately agree	Slightly agree	Moderately agree	Strongly agree	Moderately agree	Yes
Male	19	K.N.U.S.T	Human Biology	1ST YEAR	CHRISTIANITY	1. Student	1.Strongly disagree	1.Strongly disagree	1.Strongly disagree	6. Strongly agree	1.Strongly disagree	1.Strongly disagree	6. Strongly agree	1.Strongly disagree	1.Strongly disagree	6. Strongly agree	6. Strongly agree	1.Strongly disagree	6. Strongly agree	6. Strongly agree	6. Strongly agree	1.Strongly disagree	5. Agree somehow	6. Strongly agree	6. Strongly agree	1.Strongly disagree	4. Agree a little	6. Strongly agree	3. Disagree a little	3. Disagree a little	Moderately agree	Strongly disagree	Slightly disagree	Strongly disagree	Strongly agree	Strongly agree	Moderately disagree	Strongly disagree	Strongly disagree	Strongly disagree	Strongly disagree	Strongly agree	Strongly agree	Slightly agree	Strongly disagree	Moderately agree	Strongly agree	Strongly agree	No
Male	23	K.N.U.S.T	Human Biology	1ST YEAR	CHRISTIANITY	1. Student	4. Agree a little	1.Strongly disagree	6. Strongly agree	6. Strongly agree	1.Strongly disagree	3. Disagree a little	6. Strongly agree	1.Strongly disagree	1.Strongly disagree	6. Strongly agree	6. Strongly agree	1.Strongly disagree	6. Strongly agree	6. Strongly agree	6. Strongly agree	4. Agree a little	5. Agree somehow	1.Strongly disagree	6. Strongly agree	1.Strongly disagree	1.Strongly disagree	6. Strongly agree	6. Strongly agree	6. Strongly agree	Strongly agree	Strongly disagree	Moderately agree	Slightly disagree	Strongly agree	Strongly agree	Strongly disagree	Strongly disagree	Strongly disagree	Moderately disagree	Strongly disagree	Moderately agree	Moderately agree	Strongly agree	Slightly disagree	Strongly disagree	Strongly agree	Slightly disagree	No
Female	20 years	K.N.U.S.T	Bsc. Physician assistantship	2ND YEAR	CHRISTIANITY	1. Student	4. Agree a little	1.Strongly disagree	1.Strongly disagree	3. Disagree a little	4. Agree a little	2. Disagree somehow	6. Strongly agree	1.Strongly disagree	1.Strongly disagree	5. Agree somehow	6. Strongly agree	1.Strongly disagree	5. Agree somehow	6. Strongly agree	6. Strongly agree	4. Agree a little	6. Strongly agree	1.Strongly disagree	6. Strongly agree	2. Disagree somehow	1.Strongly disagree	6. Strongly agree	6. Strongly agree	6. Strongly agree	Moderately agree	Slightly agree	Slightly agree	Strongly disagree	Moderately agree	Moderately agree	Strongly agree	Strongly disagree	Moderately agree	Slightly agree	Strongly agree	Strongly agree	Moderately agree	Strongly agree	Strongly disagree	Strongly agree	Strongly agree	Strongly agree	No
Female	18	K.N.U.S.T	Bsc. Physician Assistantship	2ND YEAR	CHRISTIANITY	1. Student	4. Agree a little	1.Strongly disagree	1.Strongly disagree	4. Agree a little	1.Strongly disagree	4. Agree a little	6. Strongly agree	1.Strongly disagree	5. Agree somehow	6. Strongly agree	6. Strongly agree	1.Strongly disagree	2. Disagree somehow	6. Strongly agree	6. Strongly agree	6. Strongly agree	5. Agree somehow	5. Agree somehow	6. Strongly agree	1.Strongly disagree	3. Disagree a little	5. Agree somehow	5. Agree somehow	6. Strongly agree	Strongly agree	Moderately disagree	Moderately agree	Moderately agree	Strongly agree	Moderately agree	Strongly disagree	Slightly disagree	Slightly disagree	Moderately disagree	Strongly agree	Moderately agree	Moderately agree	Strongly agree	Strongly agree	Strongly agree	Strongly agree	Slightly agree	Yes
Female	19	K.N.U.S.T	B.Sc. Physician Assistantship	2ND YEAR	CHRISTIANITY	1. Student	2. Disagree somehow	1.Strongly disagree	1.Strongly disagree	3. Disagree a little	3. Disagree a little	5. Agree somehow	3. Disagree a little	2. Disagree somehow	4. Agree a little	6. Strongly agree	6. Strongly agree	1.Strongly disagree	5. Agree somehow	6. Strongly agree	6. Strongly agree	2. Disagree somehow	6. Strongly agree	6. Strongly agree	6. Strongly agree	4. Agree a little	2. Disagree somehow	5. Agree somehow	6. Strongly agree	6. Strongly agree	Strongly agree	Moderately agree	Slightly agree	Slightly agree	Strongly agree	Strongly agree	Slightly agree	Moderately agree	Moderately agree	Slightly agree	Moderately disagree	Moderately agree	Strongly agree	Slightly agree	Slightly agree	Moderately agree	Strongly agree	Moderately disagree	Yes
Male	23	K.N.U.S.T	Medicine	3RD YEAR	CHRISTIANITY	1. Student	5. Agree somehow	5. Agree somehow	1.Strongly disagree	6. Strongly agree	1.Strongly disagree	1.Strongly disagree	4. Agree a little	2. Disagree somehow	2. Disagree somehow	6. Strongly agree	6. Strongly agree	2. Disagree somehow	6. Strongly agree	6. Strongly agree	5. Agree somehow	6. Strongly agree	5. Agree somehow	5. Agree somehow	5. Agree somehow	3. Disagree a little	2. Disagree somehow	5. Agree somehow	6. Strongly agree	6. Strongly agree	Strongly agree	Moderately disagree	Moderately agree	Slightly agree	Slightly agree	Slightly agree	Slightly agree	Moderately disagree	Strongly disagree	Strongly disagree	Strongly disagree	Moderately agree	Moderately agree	Slightly agree	Strongly disagree	Moderately disagree	Slightly agree	Slightly disagree	No
Female	17	K.N.U.S.T	Human biology 1	1ST YEAR	CHRISTIANITY	1. Student	2. Disagree somehow	2. Disagree somehow	1.Strongly disagree	5. Agree somehow	2. Disagree somehow	5. Agree somehow	4. Agree a little	1.Strongly disagree	2. Disagree somehow	6. Strongly agree	6. Strongly agree	1.Strongly disagree	5. Agree somehow	5. Agree somehow	6. Strongly agree	6. Strongly agree	6. Strongly agree	6. Strongly agree	6. Strongly agree	2. Disagree somehow	1.Strongly disagree	6. Strongly agree	6. Strongly agree	6. Strongly agree	Strongly agree	Strongly disagree	Slightly agree	Slightly disagree	Strongly agree	Strongly agree	Moderately agree	Slightly agree	Moderately disagree	Strongly disagree	Slightly agree	Slightly disagree	Strongly agree	Slightly agree	Moderately disagree	Slightly agree	Strongly agree	Strongly disagree	No
Female	17	K.N.U.S.T	Human biology	1ST YEAR	CHRISTIANITY	1. Student	4. Agree a little	4. Agree a little	1.Strongly disagree	1.Strongly disagree	1.Strongly disagree	4. Agree a little	6. Strongly agree	1.Strongly disagree	5. Agree somehow	6. Strongly agree	6. Strongly agree	1.Strongly disagree	6. Strongly agree	6. Strongly agree	6. Strongly agree	1.Strongly disagree	6. Strongly agree	6. Strongly agree	6. Strongly agree	5. Agree somehow	2. Disagree somehow	6. Strongly agree	6. Strongly agree	6. Strongly agree	Strongly agree	Strongly disagree	Slightly disagree	Moderately agree	Moderately agree	Strongly agree	Moderately agree	Moderately disagree	Strongly disagree	Moderately disagree	Strongly disagree	Moderately agree	Moderately agree	Moderately agree	Moderately disagree	Moderately disagree	Moderately agree	Moderately disagree	Yes
Female	17	K.N.U.S.T	Human Biology	1ST YEAR	CHRISTIANITY	1. Student	2. Disagree somehow	2. Disagree somehow	2. Disagree somehow	2. Disagree somehow	2. Disagree somehow	4. Agree a little	2. Disagree somehow	1.Strongly disagree	4. Agree a little	6. Strongly agree	5. Agree somehow	1.Strongly disagree	5. Agree somehow	6. Strongly agree	6. Strongly agree	6. Strongly agree	6. Strongly agree	6. Strongly agree	6. Strongly agree	2. Disagree somehow	2. Disagree somehow	6. Strongly agree	6. Strongly agree	5. Agree somehow	Strongly agree	Moderately disagree	Moderately agree	Slightly agree	Moderately agree	Strongly agree	Moderately agree	Moderately disagree	Moderately disagree	Strongly disagree	Moderately disagree	Moderately agree	Strongly agree	Slightly agree	Moderately disagree	Slightly disagree	Strongly agree	Moderately disagree	No
Female	27	K.N.U.S.T	Human Biology	3RD YEAR	CHRISTIANITY	1. Student	4. Agree a little	1.Strongly disagree	1.Strongly disagree	3. Disagree a little	5. Agree somehow	1.Strongly disagree	4. Agree a little	1.Strongly disagree	4. Agree a little	6. Strongly agree	6. Strongly agree	1.Strongly disagree	5. Agree somehow	5. Agree somehow	6. Strongly agree	4. Agree a little	5. Agree somehow	4. Agree a little	6. Strongly agree	4. Agree a little	1.Strongly disagree	6. Strongly agree	6. Strongly agree	6. Strongly agree	Strongly agree	Strongly disagree	Slightly agree	Moderately disagree	Strongly agree	Strongly agree	Moderately disagree	Slightly disagree	Moderately disagree	Moderately disagree	Strongly disagree	Strongly agree	Strongly agree	Slightly disagree	Strongly disagree	Strongly agree	Strongly agree	Slightly disagree	Yes
Female	27	K.N.U.S.T	Human Biology	3RD YEAR	CHRISTIANITY	1. Student	3. Disagree a little	1.Strongly disagree	1.Strongly disagree	4. Agree a little	5. Agree somehow	1.Strongly disagree	4. Agree a little	1.Strongly disagree	4. Agree a little	6. Strongly agree	6. Strongly agree	2. Disagree somehow	5. Agree somehow	4. Agree a little	6. Strongly agree	4. Agree a little	6. Strongly agree	5. Agree somehow	6. Strongly agree	4. Agree a little	1.Strongly disagree	6. Strongly agree	6. Strongly agree	6. Strongly agree	Moderately agree	Strongly disagree	Slightly agree	Moderately disagree	Strongly agree	Strongly agree	Moderately disagree	Slightly disagree	Strongly disagree	Moderately agree	Strongly disagree	Moderately agree	Moderately agree	Slightly agree	Strongly disagree	Strongly agree	Strongly agree	Moderately agree	Yes
Male	20	K.N.U.S.T	BSC. HUMAN BIOLOGY (MEDICINE)	3RD YEAR	CHRISTIANITY	1. Student	1.Strongly disagree	1.Strongly disagree	1.Strongly disagree	1.Strongly disagree	1.Strongly disagree	1.Strongly disagree	6. Strongly agree	1.Strongly disagree	1.Strongly disagree	6. Strongly agree	6. Strongly agree	1.Strongly disagree	6. Strongly agree	6. Strongly agree	6. Strongly agree	6. Strongly agree	5. Agree somehow	6. Strongly agree	6. Strongly agree	1.Strongly disagree	1.Strongly disagree	6. Strongly agree	6. Strongly agree	6. Strongly agree	Slightly agree	Strongly disagree	Slightly agree	Slightly agree	Slightly agree	Slightly agree	Slightly agree	Strongly disagree	Strongly disagree	Slightly agree	Strongly disagree	Slightly agree	Strongly agree	Slightly agree	Strongly disagree	Slightly agree	Moderately agree	Slightly agree	No
Female	20	K.N.U.S.T	BSC. BDS. DENTAL SURGERY	3RD YEAR	CHRISTIANITY	1. Student	3. Disagree a little	1.Strongly disagree	1.Strongly disagree	1.Strongly disagree	4. Agree a little	6. Strongly agree	6. Strongly agree	1.Strongly disagree	1.Strongly disagree	6. Strongly agree	6. Strongly agree	1.Strongly disagree	4. Agree a little	6. Strongly agree	6. Strongly agree	6. Strongly agree	6. Strongly agree	6. Strongly agree	6. Strongly agree	4. Agree a little	4. Agree a little	6. Strongly agree	6. Strongly agree	6. Strongly agree	Strongly agree	Strongly disagree	Slightly agree	Strongly disagree	Strongly agree	Strongly agree	Strongly agree	Slightly agree	Strongly disagree	Strongly disagree	Moderately disagree	Strongly agree	Strongly agree	Strongly agree	Slightly agree	Slightly disagree	Strongly agree	Moderately disagree	Yes
Male	20	K.N.U.S.T	BSC. HUMAN BIOLOGY (MEDICINE)	3RD YEAR	CHRISTIANITY	1. Student	1.Strongly disagree	1.Strongly disagree	1.Strongly disagree	1.Strongly disagree	1.Strongly disagree	1.Strongly disagree	1.Strongly disagree	1.Strongly disagree	1.Strongly disagree	6. Strongly agree	6. Strongly agree	1.Strongly disagree	6. Strongly agree	5. Agree somehow	6. Strongly agree	6. Strongly agree	6. Strongly agree	6. Strongly agree	6. Strongly agree	1.Strongly disagree	1.Strongly disagree	5. Agree somehow	6. Strongly agree	6. Strongly agree	Slightly agree	Strongly disagree	Moderately agree	Slightly agree	Moderately agree	Moderately agree	Moderately agree	Strongly disagree	Strongly disagree	Moderately agree	Strongly disagree	Moderately agree	Moderately agree	Moderately agree	Strongly disagree	Moderately agree	Moderately agree	Slightly agree	No
Female	20	K.N.U.S.T	Medicine	1ST YEAR	CHRISTIANITY	1. Student	3. Disagree a little	4. Agree a little	4. Agree a little	4. Agree a little	2. Disagree somehow	3. Disagree a little	4. Agree a little	5. Agree somehow	1.Strongly disagree	4. Agree a little	5. Agree somehow	3. Disagree a little	4. Agree a little	5. Agree somehow	2. Disagree somehow	6. Strongly agree	2. Disagree somehow	4. Agree a little	5. Agree somehow	4. Agree a little	3. Disagree a little	2. Disagree somehow	1.Strongly disagree	2. Disagree somehow	Moderately disagree	Slightly disagree	Slightly agree	Moderately agree	Slightly agree	Slightly agree	Moderately agree	Slightly disagree	Moderately agree	Slightly agree	Slightly agree	Moderately agree	Strongly agree	Slightly disagree	Slightly disagree	Moderately agree	Slightly agree	Slightly agree	Yes
Male	21	K.N.U.S.T	BSC. HUMAN BIOLOGY	3RD YEAR	CHRISTIANITY	1. Student	1.Strongly disagree	1.Strongly disagree	1.Strongly disagree	1.Strongly disagree	1.Strongly disagree	1.Strongly disagree	1.Strongly disagree	1.Strongly disagree	2. Disagree somehow	6. Strongly agree	6. Strongly agree	3. Disagree a little	5. Agree somehow	6. Strongly agree	6. Strongly agree	2. Disagree somehow	5. Agree somehow	6. Strongly agree	6. Strongly agree	1.Strongly disagree	1.Strongly disagree	6. Strongly agree	6. Strongly agree	6. Strongly agree	Moderately agree	Strongly disagree	Strongly disagree	Moderately disagree	Moderately agree	Strongly agree	Moderately agree	Slightly agree	Strongly disagree	Strongly disagree	Moderately disagree	Moderately agree	Moderately agree	Strongly disagree	Strongly disagree	Moderately disagree	Strongly agree	Moderately disagree	No
Female	20	K.N.U.S.T	Medicine	1ST YEAR	CHRISTIANITY	1. Student	3. Disagree a little	3. Disagree a little	4. Agree a little	3. Disagree a little	4. Agree a little	2. Disagree somehow	6. Strongly agree	2. Disagree somehow	4. Agree a little	6. Strongly agree	6. Strongly agree	2. Disagree somehow	4. Agree a little	5. Agree somehow	4. Agree a little	1.Strongly disagree	2. Disagree somehow	2. Disagree somehow	2. Disagree somehow	6. Strongly agree	3. Disagree a little	4. Agree a little	3. Disagree a little	5. Agree somehow	Slightly agree	Slightly disagree	Moderately agree	Strongly agree	Slightly disagree	Moderately disagree	Strongly disagree	Slightly disagree	Strongly disagree	Slightly agree	Slightly disagree	Slightly disagree	Strongly agree	Slightly agree	Moderately disagree	Moderately disagree	Slightly disagree	Strongly disagree	Yes
Female	20	K.N.U.S.T	Human biology	3RD YEAR	CHRISTIANITY	1. Student	1.Strongly disagree	1.Strongly disagree	1.Strongly disagree	1.Strongly disagree	1.Strongly disagree	1.Strongly disagree	1.Strongly disagree	1.Strongly disagree	1.Strongly disagree	6. Strongly agree	6. Strongly agree	1.Strongly disagree	6. Strongly agree	6. Strongly agree	6. Strongly agree	1.Strongly disagree	6. Strongly agree	6. Strongly agree	6. Strongly agree	1.Strongly disagree	1.Strongly disagree	6. Strongly agree	6. Strongly agree	6. Strongly agree	Strongly agree	Strongly disagree	Strongly disagree	Strongly disagree	Strongly agree	Strongly agree	Strongly disagree	Moderately agree	Strongly disagree	Strongly disagree	Strongly agree	Strongly agree	Strongly agree	Moderately agree	Strongly disagree	Strongly disagree	Strongly agree	Slightly disagree	No
Female	21	K.N.U.S.T	HUMAN BIOLOGY	3RD YEAR	CHRISTIANITY	1. Student	3. Disagree a little	4. Agree a little	3. Disagree a little	3. Disagree a little	3. Disagree a little	4. Agree a little	6. Strongly agree	5. Agree somehow	4. Agree a little	6. Strongly agree	6. Strongly agree	3. Disagree a little	6. Strongly agree	6. Strongly agree	6. Strongly agree	4. Agree a little	5. Agree somehow	5. Agree somehow	5. Agree somehow	4. Agree a little	2. Disagree somehow	6. Strongly agree	6. Strongly agree	6. Strongly agree	Moderately agree	Moderately disagree	Moderately agree	Moderately disagree	Strongly agree	Strongly agree	Moderately agree	Slightly disagree	Moderately disagree	Slightly disagree	Slightly disagree	Strongly agree	Strongly agree	Moderately agree	Slightly disagree	Moderately disagree	Moderately agree	Slightly disagree	No
Female	22	K.N.U.S.T	Bsc. Human Biology	3RD YEAR	CHRISTIANITY	1. Student	2. Disagree somehow	1.Strongly disagree	1.Strongly disagree	3. Disagree a little	1.Strongly disagree	1.Strongly disagree	4. Agree a little	1.Strongly disagree	4. Agree a little	6. Strongly agree	6. Strongly agree	1.Strongly disagree	5. Agree somehow	4. Agree a little	6. Strongly agree	4. Agree a little	5. Agree somehow	3. Disagree a little	6. Strongly agree	5. Agree somehow	5. Agree somehow	6. Strongly agree	6. Strongly agree	6. Strongly agree	Strongly agree	Moderately disagree	Moderately agree	Slightly agree	Strongly agree	Strongly agree	Strongly disagree	Slightly disagree	Strongly disagree	Strongly disagree	Moderately disagree	Strongly agree	Strongly agree	Slightly agree	Moderately disagree	Slightly agree	Strongly agree	Strongly disagree	Yes
Male	21	K.N.U.S.T	Human Biology (Dentistry )	3RD YEAR	CHRISTIANITY	1. Student	1.Strongly disagree	1.Strongly disagree	1.Strongly disagree	1.Strongly disagree	1.Strongly disagree	1.Strongly disagree	6. Strongly agree	1.Strongly disagree	1.Strongly disagree	6. Strongly agree	6. Strongly agree	1.Strongly disagree	6. Strongly agree	6. Strongly agree	6. Strongly agree	6. Strongly agree	6. Strongly agree	6. Strongly agree	6. Strongly agree	6. Strongly agree	1.Strongly disagree	6. Strongly agree	6. Strongly agree	6. Strongly agree	Slightly agree	Strongly disagree	Moderately agree	Strongly agree	Strongly agree	Strongly agree	Slightly agree	Moderately disagree	Strongly disagree	Strongly disagree	Strongly disagree	Strongly agree	Strongly agree	Strongly agree	Strongly disagree	Strongly disagree	Strongly agree	Moderately agree	No
Female	19	K.N.U.S.T	Human Biology ( Medicine)	1ST YEAR	CHRISTIANITY	1. Student	6. Strongly agree	1.Strongly disagree	1.Strongly disagree	1.Strongly disagree	4. Agree a little	1.Strongly disagree	6. Strongly agree	1.Strongly disagree	1.Strongly disagree	6. Strongly agree	6. Strongly agree	1.Strongly disagree	6. Strongly agree	6. Strongly agree	6. Strongly agree	6. Strongly agree	6. Strongly agree	6. Strongly agree	6. Strongly agree	1.Strongly disagree	2. Disagree somehow	6. Strongly agree	5. Agree somehow	6. Strongly agree	Strongly agree	Strongly disagree	Moderately disagree	Strongly disagree	Moderately disagree	Moderately agree	Strongly agree	Moderately agree	Strongly disagree	Strongly disagree	Strongly disagree	Moderately disagree	Strongly agree	Moderately disagree	Strongly disagree	Strongly disagree	Strongly agree	Moderately agree	Yes
Female	18	K.N.U.S.T	Medicine	1ST YEAR	CHRISTIANITY	1. Student	2. Disagree somehow	1.Strongly disagree	1.Strongly disagree	1.Strongly disagree	2. Disagree somehow	4. Agree a little	6. Strongly agree	1.Strongly disagree	4. Agree a little	6. Strongly agree	6. Strongly agree	4. Agree a little	3. Disagree a little	6. Strongly agree	6. Strongly agree	2. Disagree somehow	6. Strongly agree	4. Agree a little	6. Strongly agree	4. Agree a little	6. Strongly agree	5. Agree somehow	6. Strongly agree	4. Agree a little	Strongly agree	Moderately agree	Slightly disagree	Slightly agree	Moderately agree	Strongly agree	Slightly agree	Slightly agree	Strongly disagree	Slightly disagree	Strongly disagree	Strongly agree	Strongly agree	Slightly agree	Moderately disagree	Strongly agree	Strongly agree	Slightly disagree	Yes
Female	18	K.N.U.S.T	medicine	1ST YEAR	CHRISTIANITY	1. Student	2. Disagree somehow	3. Disagree a little	1.Strongly disagree	1.Strongly disagree	3. Disagree a little	4. Agree a little	4. Agree a little	1.Strongly disagree	1.Strongly disagree	6. Strongly agree	6. Strongly agree	6. Strongly agree	6. Strongly agree	6. Strongly agree	6. Strongly agree	1.Strongly disagree	6. Strongly agree	6. Strongly agree	6. Strongly agree	6. Strongly agree	6. Strongly agree	6. Strongly agree	6. Strongly agree	6. Strongly agree	Strongly agree	Slightly agree	Slightly agree	Slightly agree	Strongly agree	Strongly agree	Slightly agree	Slightly agree	Strongly disagree	Slightly agree	Strongly disagree	Strongly agree	Strongly agree	Moderately agree	Slightly agree	Slightly agree	Strongly agree	Slightly agree	Yes
Male	20	K.N.U.S.T	HUMAN BIOLOGY	3RD YEAR	CHRISTIANITY	1. Student	1.Strongly disagree	4. Agree a little	2. Disagree somehow	4. Agree a little	2. Disagree somehow	3. Disagree a little	5. Agree somehow	2. Disagree somehow	4. Agree a little	5. Agree somehow	6. Strongly agree	2. Disagree somehow	6. Strongly agree	6. Strongly agree	6. Strongly agree	2. Disagree somehow	2. Disagree somehow	6. Strongly agree	6. Strongly agree	4. Agree a little	5. Agree somehow	5. Agree somehow	6. Strongly agree	6. Strongly agree	Moderately agree	Moderately agree	Moderately disagree	Slightly disagree	Strongly agree	Strongly disagree	Moderately disagree	Slightly agree	Moderately disagree	Slightly agree	Slightly disagree	Moderately agree	Strongly disagree	Moderately agree	Slightly agree	Slightly agree	Moderately agree	Moderately agree	No
Female	21	K.N.U.S.T	BDS. BSC. (DENTAL SURGERY)	3RD YEAR	CHRISTIANITY	1. Student	1.Strongly disagree	1.Strongly disagree	1.Strongly disagree	1.Strongly disagree	1.Strongly disagree	4. Agree a little	1.Strongly disagree	1.Strongly disagree	1.Strongly disagree	6. Strongly agree	6. Strongly agree	1.Strongly disagree	6. Strongly agree	6. Strongly agree	6. Strongly agree	6. Strongly agree	6. Strongly agree	6. Strongly agree	6. Strongly agree	6. Strongly agree	1.Strongly disagree	6. Strongly agree	6. Strongly agree	6. Strongly agree	Strongly agree	Strongly disagree	Strongly agree	Strongly agree	Strongly agree	Strongly agree	Strongly agree	Strongly agree	Slightly disagree	Slightly agree	Slightly disagree	Strongly agree	Strongly agree	Strongly agree	Slightly disagree	Slightly disagree	Strongly agree	Slightly disagree	No
Female	20	K.N.U.S.T	HUMAN BIOLOGY	3RD YEAR	CHRISTIANITY	1. Student	3. Disagree a little	2. Disagree somehow	1.Strongly disagree	3. Disagree a little	1.Strongly disagree	5. Agree somehow	6. Strongly agree	1.Strongly disagree	4. Agree a little	6. Strongly agree	6. Strongly agree	2. Disagree somehow	6. Strongly agree	6. Strongly agree	6. Strongly agree	4. Agree a little	5. Agree somehow	5. Agree somehow	1.Strongly disagree	5. Agree somehow	1.Strongly disagree	6. Strongly agree	6. Strongly agree	4. Agree a little	Moderately agree	Strongly disagree	Slightly agree	Slightly disagree	Strongly agree	Slightly disagree	Moderately disagree	Strongly disagree	Strongly disagree	Slightly disagree	Moderately disagree	Slightly disagree	Moderately agree	Moderately agree	Moderately disagree	Slightly disagree	Moderately agree	Slightly agree	Yes
Female	17	K.N.U.S.T	Human biology	1ST YEAR	CHRISTIANITY	1. Student	4. Agree a little	4. Agree a little	4. Agree a little	4. Agree a little	4. Agree a little	4. Agree a little	4. Agree a little	4. Agree a little	4. Agree a little	4. Agree a little	4. Agree a little	4. Agree a little	4. Agree a little	4. Agree a little	4. Agree a little	4. Agree a little	4. Agree a little	4. Agree a little	4. Agree a little	4. Agree a little	4. Agree a little	4. Agree a little	4. Agree a little	4. Agree a little	Slightly agree	Slightly agree	Slightly agree	Slightly agree	Slightly agree	Slightly agree	Slightly agree	Slightly agree	Slightly agree	Slightly agree	Slightly agree	Slightly agree	Slightly agree	Slightly agree	Slightly agree	Slightly agree	Slightly agree	Slightly agree	No
Male	21	K.N.U.S.T	BSc. Human Biology, Medicine	3RD YEAR	CHRISTIANITY	1. Student	4. Agree a little	1.Strongly disagree	1.Strongly disagree	1.Strongly disagree	1.Strongly disagree	1.Strongly disagree	2. Disagree somehow	1.Strongly disagree	1.Strongly disagree	6. Strongly agree	6. Strongly agree	1.Strongly disagree	2. Disagree somehow	5. Agree somehow	6. Strongly agree	6. Strongly agree	5. Agree somehow	5. Agree somehow	6. Strongly agree	5. Agree somehow	1.Strongly disagree	6. Strongly agree	6. Strongly agree	6. Strongly agree	Moderately agree	Strongly disagree	Moderately disagree	Moderately disagree	Strongly agree	Moderately agree	Moderately agree	Slightly agree	Strongly disagree	Moderately agree	Moderately disagree	Moderately agree	Moderately agree	Moderately agree	Slightly disagree	Moderately disagree	Strongly agree	Moderately agree	Yes
Male	24	K.N.U.S.T	BSc Physician Assistantship	2ND YEAR	CHRISTIANITY	1. Student	1.Strongly disagree	4. Agree a little	1.Strongly disagree	6. Strongly agree	2. Disagree somehow	1.Strongly disagree	6. Strongly agree	1.Strongly disagree	1.Strongly disagree	5. Agree somehow	5. Agree somehow	2. Disagree somehow	3. Disagree a little	6. Strongly agree	6. Strongly agree	6. Strongly agree	5. Agree somehow	6. Strongly agree	6. Strongly agree	1.Strongly disagree	5. Agree somehow	5. Agree somehow	6. Strongly agree	6. Strongly agree	Strongly disagree	Slightly disagree	Strongly agree	Slightly disagree	Strongly agree	Strongly agree	Strongly agree	Slightly agree	Moderately disagree	Moderately agree	Moderately agree	Moderately agree	Moderately agree	Moderately agree	Strongly agree	Moderately agree	Strongly agree	Moderately agree	No
Female	20	K.N.U.S.T	Human Biology	3RD YEAR	CHRISTIANITY	1. Student	3. Disagree a little	1.Strongly disagree	3. Disagree a little	2. Disagree somehow	1.Strongly disagree	2. Disagree somehow	6. Strongly agree	1.Strongly disagree	4. Agree a little	6. Strongly agree	5. Agree somehow	1.Strongly disagree	4. Agree a little	6. Strongly agree	6. Strongly agree	6. Strongly agree	6. Strongly agree	6. Strongly agree	6. Strongly agree	4. Agree a little	1.Strongly disagree	6. Strongly agree	5. Agree somehow	5. Agree somehow	Slightly agree	Slightly agree	Moderately disagree	Slightly disagree	Slightly agree	Slightly agree	Moderately disagree	Moderately disagree	Moderately disagree	Strongly disagree	Strongly disagree	Slightly disagree	Moderately agree	Slightly agree	Moderately disagree	Slightly agree	Slightly agree	Slightly agree	No
Female	21	K.N.U.S.T	Human Biology	3RD YEAR	CHRISTIANITY	1. Student	4. Agree a little	6. Strongly agree	1.Strongly disagree	3. Disagree a little	3. Disagree a little	1.Strongly disagree	5. Agree somehow	1.Strongly disagree	3. Disagree a little	6. Strongly agree	6. Strongly agree	1.Strongly disagree	6. Strongly agree	6. Strongly agree	6. Strongly agree	6. Strongly agree	5. Agree somehow	6. Strongly agree	6. Strongly agree	4. Agree a little	3. Disagree a little	6. Strongly agree	5. Agree somehow	6. Strongly agree	Moderately agree	Slightly disagree	Moderately agree	Moderately agree	Strongly agree	Slightly agree	Moderately agree	Moderately disagree	Slightly agree	Slightly agree	Moderately agree	Slightly agree	Moderately agree	Moderately agree	Strongly disagree	Moderately agree	Strongly agree	Moderately agree	Yes
Male	19	K.N.U.S.T	Human Biology	1ST YEAR	CHRISTIANITY	1. Student	1.Strongly disagree	5. Agree somehow	2. Disagree somehow	1.Strongly disagree	1.Strongly disagree	5. Agree somehow	6. Strongly agree	1.Strongly disagree	1.Strongly disagree	6. Strongly agree	6. Strongly agree	5. Agree somehow	5. Agree somehow	6. Strongly agree	6. Strongly agree	4. Agree a little	4. Agree a little	6. Strongly agree	6. Strongly agree	5. Agree somehow	2. Disagree somehow	5. Agree somehow	5. Agree somehow	6. Strongly agree	Moderately agree	Moderately disagree	Slightly agree	Slightly disagree	Strongly agree	Moderately agree	Moderately agree	Slightly agree	Moderately disagree	Slightly disagree	Slightly disagree	Strongly agree	Strongly agree	Moderately agree	Moderately disagree	Slightly agree	Strongly agree	Slightly agree	No
Male	22	K.N.U.S.T	BSc Human Biology	3RD YEAR	CHRISTIANITY	1. Student	1.Strongly disagree	1.Strongly disagree	1.Strongly disagree	1.Strongly disagree	1.Strongly disagree	1.Strongly disagree	1.Strongly disagree	1.Strongly disagree	1.Strongly disagree	6. Strongly agree	6. Strongly agree	3. Disagree a little	4. Agree a little	6. Strongly agree	4. Agree a little	1.Strongly disagree	6. Strongly agree	4. Agree a little	6. Strongly agree	2. Disagree somehow	3. Disagree a little	6. Strongly agree	6. Strongly agree	6. Strongly agree	Moderately agree	Slightly disagree	Slightly agree	Moderately agree	Strongly agree	Moderately agree	Moderately agree	Strongly disagree	Moderately agree	Strongly disagree	Strongly disagree	Moderately agree	Strongly agree	Moderately agree	Strongly agree	Strongly agree	Strongly agree	Strongly agree	No
Female	18	K.N.U.S.T	Human biology (medicine)	1ST YEAR	CHRISTIANITY	1. Student	4. Agree a little	1.Strongly disagree	1.Strongly disagree	3. Disagree a little	2. Disagree somehow	4. Agree a little	6. Strongly agree	1.Strongly disagree	4. Agree a little	4. Agree a little	6. Strongly agree	1.Strongly disagree	6. Strongly agree	6. Strongly agree	6. Strongly agree	4. Agree a little	4. Agree a little	5. Agree somehow	6. Strongly agree	5. Agree somehow	2. Disagree somehow	6. Strongly agree	6. Strongly agree	6. Strongly agree	Moderately agree	Moderately disagree	Slightly agree	Slightly agree	Moderately agree	Moderately agree	Moderately agree	Slightly agree	Strongly disagree	Moderately disagree	Strongly disagree	Moderately agree	Strongly agree	Slightly agree	Strongly disagree	Slightly agree	Strongly agree	Slightly agree	Yes
Female	25	K.N.U.S.T	Human biology	3RD YEAR	CHRISTIANITY	1. Student	4. Agree a little	1.Strongly disagree	1.Strongly disagree	1.Strongly disagree	1.Strongly disagree	1.Strongly disagree	6. Strongly agree	1.Strongly disagree	1.Strongly disagree	6. Strongly agree	6. Strongly agree	1.Strongly disagree	1.Strongly disagree	6. Strongly agree	6. Strongly agree	2. Disagree somehow	6. Strongly agree	2. Disagree somehow	6. Strongly agree	1.Strongly disagree	1.Strongly disagree	6. Strongly agree	6. Strongly agree	6. Strongly agree	Moderately agree	Strongly disagree	Moderately disagree	Moderately disagree	Moderately disagree	Moderately agree	Moderately disagree	Strongly disagree	Strongly disagree	Strongly disagree	Strongly disagree	Moderately agree	Moderately agree	Strongly disagree	Strongly disagree	Strongly disagree	Moderately agree	Strongly disagree	Yes
Female	21	K.N.U.S.T	Bsc. Human biology	3RD YEAR	CHRISTIANITY	1. Student	4. Agree a little	1.Strongly disagree	1.Strongly disagree	5. Agree somehow	1.Strongly disagree	1.Strongly disagree	6. Strongly agree	1.Strongly disagree	2. Disagree somehow	6. Strongly agree	6. Strongly agree	1.Strongly disagree	6. Strongly agree	6. Strongly agree	6. Strongly agree	1.Strongly disagree	4. Agree a little	6. Strongly agree	6. Strongly agree	1.Strongly disagree	1.Strongly disagree	6. Strongly agree	6. Strongly agree	6. Strongly agree	Strongly agree	Strongly disagree	Strongly disagree	Strongly disagree	Strongly agree	Strongly agree	Slightly agree	Moderately disagree	Strongly disagree	Strongly disagree	Strongly disagree	Strongly agree	Strongly agree	Moderately agree	Strongly disagree	Strongly disagree	Strongly agree	Strongly disagree	Yes
Female	20	K.N.U.S.T	Human Biology/ Medicine	1ST YEAR	CHRISTIANITY	1. Student	4. Agree a little	1.Strongly disagree	1.Strongly disagree	1.Strongly disagree	1.Strongly disagree	1.Strongly disagree	2. Disagree somehow	1.Strongly disagree	2. Disagree somehow	6. Strongly agree	4. Agree a little	1.Strongly disagree	6. Strongly agree	6. Strongly agree	6. Strongly agree	6. Strongly agree	6. Strongly agree	5. Agree somehow	6. Strongly agree	1.Strongly disagree	1.Strongly disagree	5. Agree somehow	5. Agree somehow	4. Agree a little	Moderately agree	Slightly disagree	Slightly agree	Slightly agree	Slightly agree	Slightly agree	Moderately agree	Moderately disagree	Strongly disagree	Strongly disagree	Moderately disagree	Moderately agree	Moderately agree	Slightly agree	Moderately disagree	Slightly disagree	Strongly agree	Moderately disagree	Yes
Male	20	K.N.U.S.T	Bsc human Biology MB CHB	3RD YEAR	CHRISTIANITY	1. Student	2. Disagree somehow	3. Disagree a little	3. Disagree a little	5. Agree somehow	3. Disagree a little	3. Disagree a little	4. Agree a little	1.Strongly disagree	4. Agree a little	6. Strongly agree	6. Strongly agree	2. Disagree somehow	3. Disagree a little	6. Strongly agree	6. Strongly agree	4. Agree a little	5. Agree somehow	6. Strongly agree	6. Strongly agree	4. Agree a little	2. Disagree somehow	6. Strongly agree	6. Strongly agree	6. Strongly agree	Slightly agree	Slightly disagree	Slightly agree	Moderately disagree	Slightly agree	Slightly agree	Slightly agree	Moderately disagree	Moderately agree	Moderately disagree	Moderately disagree	Slightly disagree	Strongly agree	Slightly agree	Slightly disagree	Slightly disagree	Moderately agree	Slightly agree	No
Male	22	K.N.U.S.T	Bsc. Human Biology	3RD YEAR	CHRISTIANITY	1. Student	5. Agree somehow	1.Strongly disagree	1.Strongly disagree	2. Disagree somehow	1.Strongly disagree	1.Strongly disagree	2. Disagree somehow	1.Strongly disagree	2. Disagree somehow	6. Strongly agree	6. Strongly agree	1.Strongly disagree	6. Strongly agree	5. Agree somehow	6. Strongly agree	5. Agree somehow	2. Disagree somehow	5. Agree somehow	6. Strongly agree	1.Strongly disagree	1.Strongly disagree	6. Strongly agree	6. Strongly agree	6. Strongly agree	Slightly agree	Strongly disagree	Slightly agree	Moderately disagree	Strongly agree	Slightly agree	Slightly agree	Moderately disagree	Slightly agree	Slightly disagree	Moderately disagree	Slightly agree	Moderately agree	Slightly agree	Slightly agree	Strongly disagree	Strongly agree	Slightly disagree	No
Male	20	K.N.U.S.T	Bsc. Human Biology	3RD YEAR	CHRISTIANITY	1. Student	5. Agree somehow	3. Disagree a little	1.Strongly disagree	6. Strongly agree	1.Strongly disagree	5. Agree somehow	6. Strongly agree	1.Strongly disagree	2. Disagree somehow	6. Strongly agree	6. Strongly agree	1.Strongly disagree	5. Agree somehow	6. Strongly agree	6. Strongly agree	1.Strongly disagree	4. Agree a little	5. Agree somehow	6. Strongly agree	4. Agree a little	2. Disagree somehow	6. Strongly agree	6. Strongly agree	6. Strongly agree	Moderately agree	Moderately disagree	Moderately disagree	Strongly disagree	Slightly disagree	Moderately agree	Moderately agree	Moderately disagree	Moderately agree	Strongly agree	Moderately agree	Strongly disagree	Slightly disagree	Slightly agree	Slightly agree	Slightly agree	Slightly agree	Strongly disagree	No
Male	20	K.N.U.S.T	BSc physician Assistantship	2ND YEAR	ISLAMIC	1. Student	2. Disagree somehow	1.Strongly disagree	1.Strongly disagree	4. Agree a little	1.Strongly disagree	1.Strongly disagree	6. Strongly agree	1.Strongly disagree	1.Strongly disagree	6. Strongly agree	6. Strongly agree	1.Strongly disagree	3. Disagree a little	6. Strongly agree	6. Strongly agree	6. Strongly agree	6. Strongly agree	6. Strongly agree	6. Strongly agree	2. Disagree somehow	2. Disagree somehow	6. Strongly agree	6. Strongly agree	6. Strongly agree	Strongly agree	Strongly disagree	Strongly agree	Strongly agree	Strongly agree	Strongly agree	Strongly agree	Strongly agree	Moderately disagree	Slightly disagree	Strongly agree	Strongly agree	Strongly agree	Strongly agree	Strongly disagree	Strongly agree	Strongly agree	Slightly agree	Yes
Male	20	K.N.U.S.T	BSc physician Assistantship	2ND YEAR	ISLAMIC	1. Student	2. Disagree somehow	1.Strongly disagree	1.Strongly disagree	4. Agree a little	1.Strongly disagree	1.Strongly disagree	6. Strongly agree	1.Strongly disagree	1.Strongly disagree	6. Strongly agree	6. Strongly agree	1.Strongly disagree	3. Disagree a little	6. Strongly agree	6. Strongly agree	6. Strongly agree	6. Strongly agree	6. Strongly agree	6. Strongly agree	2. Disagree somehow	2. Disagree somehow	6. Strongly agree	6. Strongly agree	6. Strongly agree	Strongly agree	Strongly disagree	Strongly agree	Strongly agree	Strongly agree	Strongly agree	Strongly agree	Strongly agree	Moderately disagree	Slightly disagree	Strongly agree	Strongly agree	Strongly agree	Strongly agree	Strongly disagree	Strongly agree	Strongly agree	Slightly agree	Yes
Male	22	K.N.U.S.T	Human Biology	3RD YEAR	CHRISTIANITY	1. Student	4. Agree a little	2. Disagree somehow	1.Strongly disagree	5. Agree somehow	2. Disagree somehow	2. Disagree somehow	6. Strongly agree	2. Disagree somehow	2. Disagree somehow	6. Strongly agree	6. Strongly agree	1.Strongly disagree	6. Strongly agree	5. Agree somehow	5. Agree somehow	6. Strongly agree	4. Agree a little	4. Agree a little	6. Strongly agree	5. Agree somehow	2. Disagree somehow	6. Strongly agree	6. Strongly agree	6. Strongly agree	Moderately agree	Slightly disagree	Moderately disagree	Moderately disagree	Strongly agree	Moderately agree	Moderately agree	Slightly disagree	Moderately disagree	Slightly disagree	Slightly disagree	Moderately agree	Moderately agree	Slightly agree	Slightly agree	Slightly disagree	Moderately agree	Slightly agree	Yes
Male	22	K.N.U.S.T	Human Biology	3RD YEAR	CHRISTIANITY	1. Student	4. Agree a little	3. Disagree a little	1.Strongly disagree	2. Disagree somehow	1.Strongly disagree	3. Disagree a little	5. Agree somehow	2. Disagree somehow	2. Disagree somehow	6. Strongly agree	6. Strongly agree	2. Disagree somehow	5. Agree somehow	5. Agree somehow	5. Agree somehow	5. Agree somehow	4. Agree a little	5. Agree somehow	5. Agree somehow	3. Disagree a little	2. Disagree somehow	5. Agree somehow	6. Strongly agree	5. Agree somehow	Moderately agree	Moderately disagree	Moderately disagree	Slightly disagree	Moderately agree	Moderately agree	Slightly agree	Slightly agree	Strongly disagree	Moderately disagree	Moderately disagree	Moderately agree	Moderately agree	Slightly agree	Slightly disagree	Moderately disagree	Moderately agree	Moderately disagree	Yes
Female	21	K.N.U.S.T	Bsc. Human Biology	3RD YEAR	CHRISTIANITY	1. Student	5. Agree somehow	1.Strongly disagree	1.Strongly disagree	3. Disagree a little	1.Strongly disagree	1.Strongly disagree	1.Strongly disagree	1.Strongly disagree	1.Strongly disagree	6. Strongly agree	6. Strongly agree	1.Strongly disagree	6. Strongly agree	5. Agree somehow	6. Strongly agree	6. Strongly agree	6. Strongly agree	6. Strongly agree	6. Strongly agree	1.Strongly disagree	1.Strongly disagree	6. Strongly agree	6. Strongly agree	6. Strongly agree	Strongly agree	Strongly disagree	Strongly agree	Strongly disagree	Strongly agree	Moderately agree	Moderately agree	Slightly agree	Strongly disagree	Slightly agree	Strongly disagree	Moderately agree	Strongly agree	Slightly agree	Strongly disagree	Strongly disagree	Strongly agree	Slightly agree	Yes
Male	21	K.N.U.S.T	BSC. BDS. (DENTAL SURGERY )	3RD YEAR	CHRISTIANITY	1. Student	4. Agree a little	4. Agree a little	4. Agree a little	3. Disagree a little	4. Agree a little	3. Disagree a little	4. Agree a little	1.Strongly disagree	3. Disagree a little	6. Strongly agree	6. Strongly agree	1.Strongly disagree	3. Disagree a little	1.Strongly disagree	1.Strongly disagree	3. Disagree a little	3. Disagree a little	4. Agree a little	3. Disagree a little	3. Disagree a little	3. Disagree a little	4. Agree a little	4. Agree a little	4. Agree a little	Strongly agree	Slightly disagree	Slightly disagree	Slightly agree	Moderately disagree	Moderately disagree	Slightly agree	Slightly disagree	Slightly agree	Slightly disagree	Slightly disagree	Slightly disagree	Slightly disagree	Slightly agree	Slightly agree	Slightly disagree	Slightly agree	Slightly disagree	No
Female	28	K.N.U.S.T	Dentistry	3RD YEAR	CHRISTIANITY	1. Student	5. Agree somehow	1.Strongly disagree	1.Strongly disagree	1.Strongly disagree	1.Strongly disagree	1.Strongly disagree	2. Disagree somehow	1.Strongly disagree	1.Strongly disagree	6. Strongly agree	6. Strongly agree	1.Strongly disagree	6. Strongly agree	6. Strongly agree	6. Strongly agree	6. Strongly agree	6. Strongly agree	6. Strongly agree	6. Strongly agree	1.Strongly disagree	1.Strongly disagree	6. Strongly agree	6. Strongly agree	6. Strongly agree	Strongly agree	Strongly agree	Moderately agree	Strongly disagree	Strongly agree	Moderately agree	Moderately agree	Strongly disagree	Moderately agree	Strongly disagree	Strongly disagree	Moderately agree	Moderately agree	Moderately agree	Strongly agree	Strongly agree	Strongly agree	Moderately agree	Yes
Male	22	K.N.U.S.T	Human Biology	3RD YEAR	CHRISTIANITY	1. Student	2. Disagree somehow	4. Agree a little	1.Strongly disagree	5. Agree somehow	1.Strongly disagree	2. Disagree somehow	5. Agree somehow	1.Strongly disagree	2. Disagree somehow	6. Strongly agree	6. Strongly agree	1.Strongly disagree	3. Disagree a little	6. Strongly agree	6. Strongly agree	6. Strongly agree	6. Strongly agree	4. Agree a little	5. Agree somehow	4. Agree a little	5. Agree somehow	6. Strongly agree	6. Strongly agree	5. Agree somehow	Moderately agree	Strongly disagree	Slightly agree	Moderately disagree	Moderately agree	Moderately agree	Moderately disagree	Moderately agree	Moderately disagree	Slightly disagree	Moderately disagree	Strongly agree	Strongly agree	Slightly agree	Strongly disagree	Moderately disagree	Strongly agree	Slightly disagree	No
Female	19	K.N.U.S.T	Dentistry	3RD YEAR	CHRISTIANITY	1. Student	1.Strongly disagree	2. Disagree somehow	2. Disagree somehow	6. Strongly agree	5. Agree somehow	2. Disagree somehow	1.Strongly disagree	1.Strongly disagree	4. Agree a little	6. Strongly agree	6. Strongly agree	1.Strongly disagree	1.Strongly disagree	6. Strongly agree	6. Strongly agree	6. Strongly agree	6. Strongly agree	6. Strongly agree	6. Strongly agree	2. Disagree somehow	1.Strongly disagree	6. Strongly agree	5. Agree somehow	6. Strongly agree	Strongly disagree	Strongly disagree	Strongly agree	Moderately disagree	Strongly agree	Moderately agree	Moderately disagree	Moderately disagree	Moderately agree	Moderately disagree	Moderately disagree	Moderately agree	Moderately agree	Moderately agree	Slightly agree	Slightly agree	Slightly agree	Slightly agree	No
Male	19	K.N.U.S.T	Human Biology(medicine)	1ST YEAR	ISLAMIC	1. Student	6. Strongly agree	1.Strongly disagree	1.Strongly disagree	1.Strongly disagree	1.Strongly disagree	1.Strongly disagree	4. Agree a little	1.Strongly disagree	2. Disagree somehow	6. Strongly agree	6. Strongly agree	1.Strongly disagree	6. Strongly agree	6. Strongly agree	6. Strongly agree	5. Agree somehow	4. Agree a little	6. Strongly agree	6. Strongly agree	4. Agree a little	1.Strongly disagree	6. Strongly agree	6. Strongly agree	5. Agree somehow	My behavior and the kind of treatment i get.	Slightly disagree	Strongly agree	Moderately agree	Strongly agree	Moderately disagree	Strongly agree	Slightly disagree	Strongly disagree	Slightly disagree	Moderately agree	Strongly agree	Strongly agree	Moderately agree	Slightly disagree	Strongly disagree	Strongly agree	Slightly agree	Yes
Male	20	K.N.U.S.T	Bsc. Human Biology	3RD YEAR	CHRISTIANITY	1. Student	5. Agree somehow	3. Disagree a little	1.Strongly disagree	6. Strongly agree	2. Disagree somehow	5. Agree somehow	6. Strongly agree	1.Strongly disagree	2. Disagree somehow	6. Strongly agree	6. Strongly agree	1.Strongly disagree	3. Disagree a little	6. Strongly agree	6. Strongly agree	3. Disagree a little	5. Agree somehow	5. Agree somehow	6. Strongly agree	3. Disagree a little	1.Strongly disagree	6. Strongly agree	6. Strongly agree	6. Strongly agree	Moderately agree	Moderately disagree	Slightly agree	Slightly disagree	Moderately agree	Strongly agree	Strongly disagree	Moderately disagree	Strongly disagree	Moderately disagree	Strongly disagree	Moderately agree	Strongly agree	Slightly agree	Strongly disagree	Strongly disagree	Strongly agree	Slightly agree	No
Male	21	K.N.U.S.T	Human Biology	3RD YEAR	CHRISTIANITY	1. Student	4. Agree a little	4. Agree a little	3. Disagree a little	3. Disagree a little	3. Disagree a little	4. Agree a little	4. Agree a little	1.Strongly disagree	3. Disagree a little	6. Strongly agree	4. Agree a little	1.Strongly disagree	6. Strongly agree	6. Strongly agree	6. Strongly agree	6. Strongly agree	4. Agree a little	4. Agree a little	6. Strongly agree	4. Agree a little	2. Disagree somehow	6. Strongly agree	6. Strongly agree	6. Strongly agree	Strongly agree	Strongly disagree	Strongly agree	Slightly disagree	Strongly agree	Strongly agree	Strongly agree	Strongly disagree	Moderately disagree	Strongly disagree	Strongly disagree	Strongly agree	Strongly agree	Moderately agree	Moderately disagree	Slightly disagree	Strongly agree	Slightly disagree	No
Female	22	K.N.U.S.T	Human Biology	3RD YEAR	CHRISTIANITY	1. Student	1.Strongly disagree	4. Agree a little	5. Agree somehow	6. Strongly agree	3. Disagree a little	2. Disagree somehow	6. Strongly agree	3. Disagree a little	4. Agree a little	6. Strongly agree	6. Strongly agree	1.Strongly disagree	6. Strongly agree	6. Strongly agree	4. Agree a little	3. Disagree a little	5. Agree somehow	5. Agree somehow	6. Strongly agree	6. Strongly agree	1.Strongly disagree	6. Strongly agree	6. Strongly agree	6. Strongly agree	Slightly agree	Slightly disagree	Slightly disagree	Slightly agree	Slightly agree	Moderately agree	Slightly agree	Slightly disagree	Slightly disagree	Moderately disagree	Slightly disagree	Slightly agree	Slightly agree	Moderately agree	Strongly disagree	Strongly disagree	Slightly agree	Slightly disagree	No
Male	21	K.N.U.S.T	Human Biology	3RD YEAR	CHRISTIANITY	1. Student	1.Strongly disagree	1.Strongly disagree	3. Disagree a little	3. Disagree a little	3. Disagree a little	3. Disagree a little	3. Disagree a little	3. Disagree a little	3. Disagree a little	6. Strongly agree	3. Disagree a little	3. Disagree a little	3. Disagree a little	3. Disagree a little	3. Disagree a little	4. Agree a little	3. Disagree a little	3. Disagree a little	3. Disagree a little	3. Disagree a little	3. Disagree a little	6. Strongly agree	6. Strongly agree	6. Strongly agree	Strongly agree	Strongly disagree	Strongly agree	Strongly disagree	Strongly agree	Strongly agree	Moderately agree	Moderately agree	Slightly disagree	Slightly disagree	Slightly disagree	Moderately agree	Strongly agree	Moderately agree	Strongly disagree	Slightly disagree	Strongly disagree	Slightly disagree	No
Female	21	K.N.U.S.T	Human Biology	3RD YEAR	CHRISTIANITY	1. Student	3. Disagree a little	1.Strongly disagree	1.Strongly disagree	2. Disagree somehow	5. Agree somehow	1.Strongly disagree	4. Agree a little	1.Strongly disagree	1.Strongly disagree	6. Strongly agree	6. Strongly agree	1.Strongly disagree	5. Agree somehow	6. Strongly agree	6. Strongly agree	6. Strongly agree	6. Strongly agree	6. Strongly agree	6. Strongly agree	2. Disagree somehow	1.Strongly disagree	6. Strongly agree	6. Strongly agree	6. Strongly agree	Slightly disagree	Strongly disagree	Strongly agree	Moderately disagree	Strongly agree	Moderately agree	Strongly disagree	Moderately disagree	Strongly disagree	Moderately disagree	Strongly disagree	Strongly agree	Strongly agree	Slightly agree	Slightly agree	Strongly agree	Strongly agree	Moderately agree	Yes
Female	18	K.N.U.S.T	BSC. HUMAN BIOLOGY MB.CH	1ST YEAR	CHRISTIANITY	1. Student	6. Strongly agree	5. Agree somehow	1.Strongly disagree	6. Strongly agree	2. Disagree somehow	6. Strongly agree	3. Disagree a little	4. Agree a little	1.Strongly disagree	6. Strongly agree	6. Strongly agree	4. Agree a little	6. Strongly agree	6. Strongly agree	6. Strongly agree	3. Disagree a little	4. Agree a little	6. Strongly agree	6. Strongly agree	2. Disagree somehow	4. Agree a little	6. Strongly agree	6. Strongly agree	6. Strongly agree	Strongly agree	Slightly disagree	Slightly disagree	Strongly agree	Strongly agree	Strongly agree	Slightly disagree	Moderately agree	Slightly disagree	Slightly disagree	Strongly agree	Strongly agree	Strongly agree	Slightly disagree	Slightly agree	Strongly agree	Strongly agree	Strongly agree	Yes
Male	22	K.N.U.S.T	BSc Human Biology	3RD YEAR	CHRISTIANITY	1. Student	2. Disagree somehow	1.Strongly disagree	1.Strongly disagree	1.Strongly disagree	1.Strongly disagree	1.Strongly disagree	1.Strongly disagree	1.Strongly disagree	1.Strongly disagree	5. Agree somehow	6. Strongly agree	2. Disagree somehow	6. Strongly agree	5. Agree somehow	6. Strongly agree	1.Strongly disagree	6. Strongly agree	4. Agree a little	6. Strongly agree	4. Agree a little	2. Disagree somehow	6. Strongly agree	5. Agree somehow	6. Strongly agree	Slightly agree	Slightly disagree	Slightly agree	Moderately agree	Moderately agree	Moderately agree	Moderately agree	Strongly disagree	Slightly agree	Slightly agree	Moderately disagree	Moderately agree	Moderately agree	Moderately agree	Strongly agree	Strongly agree	Strongly agree	Strongly agree	No
Male	21	K.N.U.S.T	Human Biology	3RD YEAR	CHRISTIANITY	1. Student	1.Strongly disagree	2. Disagree somehow	5. Agree somehow	6. Strongly agree	4. Agree a little	2. Disagree somehow	6. Strongly agree	1.Strongly disagree	4. Agree a little	6. Strongly agree	1.Strongly disagree	1.Strongly disagree	2. Disagree somehow	5. Agree somehow	6. Strongly agree	4. Agree a little	5. Agree somehow	4. Agree a little	6. Strongly agree	5. Agree somehow	2. Disagree somehow	6. Strongly agree	5. Agree somehow	5. Agree somehow	Moderately disagree	Strongly disagree	Moderately disagree	Moderately disagree	Moderately disagree	Moderately agree	Moderately agree	Slightly agree	Strongly disagree	Moderately agree	Moderately disagree	Moderately disagree	Moderately agree	Slightly disagree	Strongly disagree	Moderately agree	Moderately agree	Slightly agree	No
Female	19	K.N.U.S.T	Human Biology	1ST YEAR	CHRISTIANITY	1. Student	1.Strongly disagree	2. Disagree somehow	3. Disagree a little	5. Agree somehow	1.Strongly disagree	1.Strongly disagree	6. Strongly agree	1.Strongly disagree	4. Agree a little	4. Agree a little	5. Agree somehow	1.Strongly disagree	6. Strongly agree	6. Strongly agree	4. Agree a little	3. Disagree a little	2. Disagree somehow	4. Agree a little	6. Strongly agree	1.Strongly disagree	1.Strongly disagree	6. Strongly agree	6. Strongly agree	6. Strongly agree	Moderately agree	Strongly disagree	Moderately agree	Moderately agree	Slightly disagree	Strongly disagree	Moderately agree	Moderately disagree	Slightly agree	Strongly disagree	Strongly disagree	Slightly agree	Moderately disagree	Moderately agree	Strongly disagree	Slightly agree	Slightly agree	Strongly disagree	No
Female	21	K.N.U.S.T	Human Biology	3RD YEAR	CHRISTIANITY	1. Student	3. Disagree a little	4. Agree a little	2. Disagree somehow	4. Agree a little	3. Disagree a little	5. Agree somehow	5. Agree somehow	2. Disagree somehow	2. Disagree somehow	5. Agree somehow	6. Strongly agree	4. Agree a little	5. Agree somehow	5. Agree somehow	5. Agree somehow	4. Agree a little	5. Agree somehow	3. Disagree a little	4. Agree a little	3. Disagree a little	3. Disagree a little	3. Disagree a little	6. Strongly agree	6. Strongly agree	Moderately agree	Slightly agree	Moderately disagree	Slightly disagree	Slightly disagree	Slightly agree	Slightly agree	Moderately disagree	Slightly disagree	Slightly disagree	Slightly disagree	Moderately agree	Slightly agree	Slightly disagree	Moderately agree	Moderately agree	Moderately agree	Slightly disagree	Yes
Female	20	K.N.U.S.T	BSC. BDS. DENTAL SURGERY	3RD YEAR	CHRISTIANITY	1. Student	6. Strongly agree	1.Strongly disagree	1.Strongly disagree	2. Disagree somehow	1.Strongly disagree	6. Strongly agree	6. Strongly agree	1.Strongly disagree	1.Strongly disagree	6. Strongly agree	6. Strongly agree	1.Strongly disagree	3. Disagree a little	6. Strongly agree	6. Strongly agree	6. Strongly agree	6. Strongly agree	6. Strongly agree	6. Strongly agree	1.Strongly disagree	1.Strongly disagree	6. Strongly agree	6. Strongly agree	6. Strongly agree	Strongly agree	Strongly disagree	Strongly agree	Strongly disagree	Strongly agree	Strongly agree	Slightly agree	Slightly disagree	Strongly disagree	Strongly disagree	Strongly disagree	Strongly agree	Strongly agree	Strongly agree	Strongly agree	Strongly agree	Strongly agree	Slightly disagree	Yes
Male	20	K.N.U.S.T	Bsc. Human Biology MB CHB	3RD YEAR	CHRISTIANITY	1. Student	2. Disagree somehow	1.Strongly disagree	1.Strongly disagree	1.Strongly disagree	1.Strongly disagree	2. Disagree somehow	6. Strongly agree	1.Strongly disagree	1.Strongly disagree	6. Strongly agree	1.Strongly disagree	1.Strongly disagree	5. Agree somehow	6. Strongly agree	6. Strongly agree	2. Disagree somehow	6. Strongly agree	4. Agree a little	6. Strongly agree	4. Agree a little	3. Disagree a little	4. Agree a little	4. Agree a little	6. Strongly agree	Moderately agree	Slightly disagree	Strongly agree	Slightly disagree	Strongly agree	Strongly agree	Moderately agree	Moderately disagree	Strongly disagree	Slightly disagree	Slightly agree	Strongly agree	Strongly agree	Strongly agree	Slightly disagree	Strongly agree	Strongly agree	Slightly agree	No
Male	21	K.N.U.S.T	Physician assistant	2ND YEAR	CHRISTIANITY	1. Student	4. Agree a little	4. Agree a little	4. Agree a little	4. Agree a little	5. Agree somehow	4. Agree a little	4. Agree a little	4. Agree a little	4. Agree a little	5. Agree somehow	4. Agree a little	3. Disagree a little	4. Agree a little	5. Agree somehow	5. Agree somehow	3. Disagree a little	4. Agree a little	3. Disagree a little	1.Strongly disagree	3. Disagree a little	3. Disagree a little	5. Agree somehow	2. Disagree somehow	4. Agree a little	Slightly disagree	Slightly disagree	Slightly agree	Moderately agree	Strongly agree	Slightly agree	Slightly disagree	Slightly agree	Moderately disagree	Moderately disagree	Slightly agree	Moderately agree	Slightly agree	Slightly disagree	Slightly agree	Moderately agree	Slightly agree	Slightly agree	Yes
Male	20	K.N.U.S.T	physican assistantship	2ND YEAR	CHRISTIANITY	1. Student	2. Disagree somehow	3. Disagree a little	4. Agree a little	1.Strongly disagree	2. Disagree somehow	4. Agree a little	3. Disagree a little	2. Disagree somehow	3. Disagree a little	5. Agree somehow	4. Agree a little	4. Agree a little	5. Agree somehow	5. Agree somehow	4. Agree a little	5. Agree somehow	5. Agree somehow	4. Agree a little	4. Agree a little	4. Agree a little	4. Agree a little	4. Agree a little	5. Agree somehow	3. Disagree a little	Moderately disagree	Moderately disagree	Slightly agree	Slightly agree	Slightly disagree	Slightly disagree	Moderately agree	Slightly agree	Strongly agree	Slightly agree	Slightly agree	Moderately disagree	Slightly agree	Moderately disagree	Slightly disagree	Moderately disagree	Slightly disagree	Slightly disagree	No
Male	20	K.N.U.S.T	Human Biology (Medicine)	1ST YEAR	CHRISTIANITY	1. Student	1.Strongly disagree	1.Strongly disagree	1.Strongly disagree	1.Strongly disagree	1.Strongly disagree	1.Strongly disagree	1.Strongly disagree	1.Strongly disagree	1.Strongly disagree	1.Strongly disagree	1.Strongly disagree	1.Strongly disagree	1.Strongly disagree	1.Strongly disagree	1.Strongly disagree	1.Strongly disagree	1.Strongly disagree	1.Strongly disagree	1.Strongly disagree	1.Strongly disagree	1.Strongly disagree	1.Strongly disagree	5. Agree somehow	6. Strongly agree	Moderately agree	Strongly disagree	Slightly agree	Strongly disagree	Strongly agree	Strongly disagree	Slightly disagree	Slightly disagree	Strongly disagree	Moderately disagree	Strongly disagree	Moderately agree	Moderately agree	Slightly agree	Strongly disagree	Strongly agree	Strongly agree	Strongly agree	No
Male	23	K.N.U.S.T	HUMAN BIOLOGY	3RD YEAR	ISLAMIC	1. Student	2. Disagree somehow	1.Strongly disagree	1.Strongly disagree	3. Disagree a little	1.Strongly disagree	1.Strongly disagree	3. Disagree a little	2. Disagree somehow	1.Strongly disagree	6. Strongly agree	6. Strongly agree	1.Strongly disagree	3. Disagree a little	6. Strongly agree	6. Strongly agree	6. Strongly agree	6. Strongly agree	6. Strongly agree	6. Strongly agree	3. Disagree a little	3. Disagree a little	5. Agree somehow	2. Disagree somehow	3. Disagree a little	Slightly agree	Slightly disagree	Moderately agree	Slightly agree	Slightly agree	Slightly disagree	Slightly agree	Moderately disagree	Moderately disagree	Slightly disagree	Moderately disagree	Slightly disagree	Moderately agree	Slightly agree	Slightly agree	Moderately disagree	Moderately agree	Slightly disagree	Yes
Male	22	K.N.U.S.T	Human Biology	3RD YEAR	CHRISTIANITY	1. Student	3. Disagree a little	1.Strongly disagree	1.Strongly disagree	6. Strongly agree	6. Strongly agree	6. Strongly agree	6. Strongly agree	1.Strongly disagree	2. Disagree somehow	6. Strongly agree	6. Strongly agree	4. Agree a little	6. Strongly agree	4. Agree a little	6. Strongly agree	6. Strongly agree	5. Agree somehow	5. Agree somehow	6. Strongly agree	5. Agree somehow	6. Strongly agree	5. Agree somehow	4. Agree a little	6. Strongly agree	Slightly agree	Strongly disagree	Strongly disagree	Moderately disagree	Moderately agree	Moderately agree	Moderately agree	Moderately disagree	Slightly agree	Strongly disagree	Slightly agree	Strongly agree	Strongly agree	Slightly agree	Strongly agree	Slightly agree	Strongly agree	Strongly disagree	No
Male	22	K.N.U.S.T	BSc Human Biology	3RD YEAR	CHRISTIANITY	1. Student	3. Disagree a little	1.Strongly disagree	1.Strongly disagree	1.Strongly disagree	1.Strongly disagree	1.Strongly disagree	6. Strongly agree	1.Strongly disagree	2. Disagree somehow	6. Strongly agree	6. Strongly agree	4. Agree a little	6. Strongly agree	6. Strongly agree	6. Strongly agree	1.Strongly disagree	5. Agree somehow	4. Agree a little	6. Strongly agree	4. Agree a little	2. Disagree somehow	5. Agree somehow	4. Agree a little	4. Agree a little	Slightly agree	Moderately disagree	Slightly disagree	Slightly disagree	Moderately agree	Moderately agree	Slightly agree	Slightly disagree	Moderately disagree	Slightly disagree	Slightly disagree	Slightly agree	Moderately agree	Slightly disagree	Moderately disagree	Moderately disagree	Moderately agree	Slightly disagree	No
Female	17	K.N.U.S.T	BSc. Human Biology	1ST YEAR	ISLAMIC	1. Student	5. Agree somehow	4. Agree a little	1.Strongly disagree	3. Disagree a little	1.Strongly disagree	1.Strongly disagree	6. Strongly agree	1.Strongly disagree	1.Strongly disagree	6. Strongly agree	6. Strongly agree	1.Strongly disagree	2. Disagree somehow	6. Strongly agree	6. Strongly agree	5. Agree somehow	6. Strongly agree	6. Strongly agree	6. Strongly agree	5. Agree somehow	1.Strongly disagree	6. Strongly agree	6. Strongly agree	6. Strongly agree	Moderately agree	Moderately disagree	Moderately agree	Strongly disagree	Strongly agree	Moderately agree	Moderately disagree	Slightly disagree	Strongly disagree	Moderately disagree	Strongly disagree	Moderately agree	Strongly agree	Moderately agree	Strongly disagree	Strongly disagree	Strongly agree	Moderately disagree	Yes
Male	21	K.N.U.S.T	Human Biology	3RD YEAR	CHRISTIANITY	1. Student	4. Agree a little	1.Strongly disagree	2. Disagree somehow	4. Agree a little	1.Strongly disagree	2. Disagree somehow	5. Agree somehow	1.Strongly disagree	2. Disagree somehow	4. Agree a little	6. Strongly agree	2. Disagree somehow	3. Disagree a little	5. Agree somehow	5. Agree somehow	3. Disagree a little	4. Agree a little	4. Agree a little	6. Strongly agree	4. Agree a little	1.Strongly disagree	5. Agree somehow	5. Agree somehow	5. Agree somehow	Moderately agree	Slightly disagree	Slightly agree	Slightly disagree	Moderately agree	Slightly agree	Slightly disagree	Moderately agree	Moderately disagree	Moderately disagree	Moderately disagree	Slightly agree	Moderately agree	Slightly disagree	Slightly agree	Slightly agree	Slightly agree	Slightly disagree	No
Female	20	K.N.U.S.T	Bsc human biology	3RD YEAR	CHRISTIANITY	1. Student	6. Strongly agree	1.Strongly disagree	1.Strongly disagree	3. Disagree a little	1.Strongly disagree	1.Strongly disagree	5. Agree somehow	1.Strongly disagree	1.Strongly disagree	6. Strongly agree	6. Strongly agree	2. Disagree somehow	6. Strongly agree	6. Strongly agree	6. Strongly agree	6. Strongly agree	5. Agree somehow	5. Agree somehow	6. Strongly agree	5. Agree somehow	1.Strongly disagree	5. Agree somehow	5. Agree somehow	2. Disagree somehow	Moderately agree	Moderately disagree	Moderately agree	Moderately disagree	Strongly agree	Moderately agree	Slightly disagree	Slightly agree	Strongly disagree	Moderately disagree	Moderately disagree	Moderately agree	Moderately agree	Slightly disagree	Slightly agree	Moderately disagree	Moderately agree	Slightly disagree	Yes
Female	20	K.N.U.S.T	Human Biology	1ST YEAR	CHRISTIANITY	1. Student	5. Agree somehow	2. Disagree somehow	1.Strongly disagree	4. Agree a little	3. Disagree a little	5. Agree somehow	6. Strongly agree	1.Strongly disagree	2. Disagree somehow	6. Strongly agree	6. Strongly agree	2. Disagree somehow	5. Agree somehow	6. Strongly agree	5. Agree somehow	6. Strongly agree	5. Agree somehow	5. Agree somehow	6. Strongly agree	4. Agree a little	2. Disagree somehow	5. Agree somehow	6. Strongly agree	5. Agree somehow	Slightly agree	Moderately disagree	Slightly agree	Moderately disagree	Strongly agree	Moderately agree	Slightly disagree	Strongly disagree	Moderately disagree	Strongly disagree	Moderately disagree	Slightly disagree	Slightly agree	Slightly disagree	Strongly disagree	Moderately agree	Moderately agree	Moderately disagree	Yes
Female	21	K.N.U.S.T	Bsc Human Biology	3RD YEAR	CHRISTIANITY	1. Student	4. Agree a little	1.Strongly disagree	1.Strongly disagree	1.Strongly disagree	1.Strongly disagree	1.Strongly disagree	6. Strongly agree	1.Strongly disagree	1.Strongly disagree	6. Strongly agree	6. Strongly agree	1.Strongly disagree	1.Strongly disagree	6. Strongly agree	6. Strongly agree	1.Strongly disagree	5. Agree somehow	6. Strongly agree	6. Strongly agree	1.Strongly disagree	1.Strongly disagree	6. Strongly agree	6. Strongly agree	6. Strongly agree	Strongly agree	Strongly disagree	Strongly disagree	Strongly disagree	Strongly agree	Strongly agree	Slightly agree	Slightly agree	Strongly disagree	Strongly disagree	Strongly disagree	Moderately agree	Strongly agree	Slightly disagree	Moderately disagree	Strongly disagree	Strongly agree	Strongly disagree	Yes
Female	20	K.N.U.S.T	B.Sc. Human Biology	3RD YEAR	CHRISTIANITY	1. Student	1.Strongly disagree	1.Strongly disagree	1.Strongly disagree	4. Agree a little	2. Disagree somehow	5. Agree somehow	6. Strongly agree	1.Strongly disagree	3. Disagree a little	6. Strongly agree	6. Strongly agree	1.Strongly disagree	6. Strongly agree	6. Strongly agree	6. Strongly agree	1.Strongly disagree	2. Disagree somehow	2. Disagree somehow	6. Strongly agree	3. Disagree a little	1.Strongly disagree	6. Strongly agree	5. Agree somehow	5. Agree somehow	Strongly agree	Strongly disagree	Strongly disagree	Strongly agree	Slightly disagree	Slightly agree	Strongly agree	Strongly agree	Strongly disagree	Strongly disagree	Strongly disagree	Moderately agree	Slightly disagree	Strongly disagree	Moderately agree	Strongly disagree	Strongly agree	Strongly disagree	Yes
Male	19	K.N.U.S.T	Human Biology(medicine)	1ST YEAR	CHRISTIANITY	1. Student	2. Disagree somehow	6. Strongly agree	6. Strongly agree	5. Agree somehow	1.Strongly disagree	1.Strongly disagree	2. Disagree somehow	1.Strongly disagree	2. Disagree somehow	6. Strongly agree	6. Strongly agree	2. Disagree somehow	5. Agree somehow	6. Strongly agree	6. Strongly agree	5. Agree somehow	6. Strongly agree	5. Agree somehow	6. Strongly agree	2. Disagree somehow	2. Disagree somehow	6. Strongly agree	6. Strongly agree	6. Strongly agree	Moderately disagree	Strongly disagree	Moderately agree	Moderately disagree	Strongly agree	Strongly agree	Slightly agree	Strongly agree	Strongly disagree	Strongly disagree	Moderately disagree	Strongly agree	Strongly agree	Moderately agree	Strongly disagree	Strongly disagree	Strongly agree	Moderately disagree	Yes
Male	20	K.N.U.S.T	BSC HUMAN BIOLOGY MB CHB	3RD YEAR	CHRISTIANITY	1. Student	1.Strongly disagree	6. Strongly agree	6. Strongly agree	6. Strongly agree	6. Strongly agree	6. Strongly agree	6. Strongly agree	4. Agree a little	1.Strongly disagree	6. Strongly agree	5. Agree somehow	2. Disagree somehow	1.Strongly disagree	4. Agree a little	6. Strongly agree	6. Strongly agree	6. Strongly agree	6. Strongly agree	6. Strongly agree	6. Strongly agree	5. Agree somehow	6. Strongly agree	6. Strongly agree	6. Strongly agree	Strongly agree	Slightly disagree	Strongly agree	Slightly disagree	Strongly agree	Strongly agree	Strongly agree	Strongly agree	Moderately disagree	Slightly agree	Slightly agree	Strongly agree	Strongly agree	Strongly agree	Moderately disagree	Moderately disagree	Strongly agree	Slightly agree	No
Female	20	K.N.U.S.T	Human biology	3RD YEAR	ISLAMIC	1. Student	4. Agree a little	1.Strongly disagree	1.Strongly disagree	3. Disagree a little	1.Strongly disagree	1.Strongly disagree	6. Strongly agree	1.Strongly disagree	3. Disagree a little	6. Strongly agree	6. Strongly agree	3. Disagree a little	6. Strongly agree	6. Strongly agree	6. Strongly agree	5. Agree somehow	6. Strongly agree	4. Agree a little	6. Strongly agree	5. Agree somehow	4. Agree a little	5. Agree somehow	5. Agree somehow	4. Agree a little	Slightly agree	Slightly disagree	Moderately disagree	Slightly agree	Strongly agree	Slightly agree	Moderately disagree	Slightly disagree	Slightly agree	Moderately disagree	Slightly agree	Slightly agree	Moderately disagree	Moderately disagree	Strongly agree	Slightly agree	Moderately agree	Slightly agree	Yes
Female	20	K.N.U.S.T	Human biology (Dentistry)	3RD YEAR	CHRISTIANITY	1. Student	4. Agree a little	1.Strongly disagree	1.Strongly disagree	3. Disagree a little	1.Strongly disagree	2. Disagree somehow	6. Strongly agree	1.Strongly disagree	2. Disagree somehow	6. Strongly agree	6. Strongly agree	1.Strongly disagree	6. Strongly agree	5. Agree somehow	6. Strongly agree	6. Strongly agree	3. Disagree a little	5. Agree somehow	6. Strongly agree	2. Disagree somehow	1.Strongly disagree	6. Strongly agree	5. Agree somehow	5. Agree somehow	Moderately agree	Moderately disagree	Slightly disagree	Slightly disagree	Moderately agree	Moderately agree	Moderately disagree	Slightly disagree	Strongly disagree	Slightly disagree	Strongly disagree	Slightly disagree	Moderately agree	Slightly disagree	Strongly disagree	Strongly disagree	Strongly agree	Slightly disagree	No
Female	20	K.N.U.S.T	Human biology	3RD YEAR	CHRISTIANITY	1. Student	1.Strongly disagree	1.Strongly disagree	1.Strongly disagree	5. Agree somehow	1.Strongly disagree	1.Strongly disagree	1.Strongly disagree	1.Strongly disagree	1.Strongly disagree	6. Strongly agree	6. Strongly agree	1.Strongly disagree	1.Strongly disagree	6. Strongly agree	6. Strongly agree	1.Strongly disagree	6. Strongly agree	6. Strongly agree	6. Strongly agree	1.Strongly disagree	1.Strongly disagree	6. Strongly agree	6. Strongly agree	6. Strongly agree	Strongly agree	Strongly disagree	Strongly disagree	Strongly disagree	Slightly agree	Strongly agree	Strongly disagree	Strongly agree	Strongly disagree	Strongly disagree	Strongly agree	Strongly agree	Strongly agree	Slightly agree	Strongly disagree	Strongly disagree	Strongly agree	Slightly agree	No
Female	20	K.N.U.S.T	HUMAN BIOLOGY	3RD YEAR	CHRISTIANITY	1. Student	3. Disagree a little	3. Disagree a little	1.Strongly disagree	3. Disagree a little	1.Strongly disagree	5. Agree somehow	6. Strongly agree	1.Strongly disagree	3. Disagree a little	6. Strongly agree	6. Strongly agree	2. Disagree somehow	6. Strongly agree	5. Agree somehow	6. Strongly agree	2. Disagree somehow	5. Agree somehow	5. Agree somehow	6. Strongly agree	3. Disagree a little	2. Disagree somehow	5. Agree somehow	5. Agree somehow	4. Agree a little	Moderately agree	Slightly disagree	Slightly agree	Slightly agree	Strongly agree	Slightly agree	Slightly disagree	Strongly disagree	Strongly disagree	Slightly disagree	Moderately disagree	Slightly agree	Strongly agree	Moderately agree	Moderately disagree	Slightly disagree	Strongly agree	Slightly disagree	Yes
Female	21	K.N.U.S.T	HUMAN BIOLOGY	3RD YEAR	CHRISTIANITY	1. Student	3. Disagree a little	1.Strongly disagree	1.Strongly disagree	3. Disagree a little	1.Strongly disagree	4. Agree a little	6. Strongly agree	1.Strongly disagree	4. Agree a little	6. Strongly agree	5. Agree somehow	1.Strongly disagree	6. Strongly agree	6. Strongly agree	6. Strongly agree	1.Strongly disagree	5. Agree somehow	5. Agree somehow	6. Strongly agree	4. Agree a little	1.Strongly disagree	6. Strongly agree	6. Strongly agree	6. Strongly agree	Slightly agree	Moderately disagree	Slightly disagree	Slightly agree	Strongly agree	Moderately agree	Slightly disagree	Slightly disagree	Strongly disagree	Slightly agree	Strongly disagree	Slightly agree	Slightly agree	Moderately agree	Slightly disagree	Slightly agree	Strongly agree	Slightly agree	Yes
Female	20	K.N.U.S.T	Physician Assistantship	2ND YEAR	CHRISTIANITY	1. Student	5. Agree somehow	1.Strongly disagree	1.Strongly disagree	6. Strongly agree	2. Disagree somehow	1.Strongly disagree	6. Strongly agree	1.Strongly disagree	1.Strongly disagree	6. Strongly agree	5. Agree somehow	1.Strongly disagree	6. Strongly agree	6. Strongly agree	6. Strongly agree	1.Strongly disagree	6. Strongly agree	6. Strongly agree	6. Strongly agree	1.Strongly disagree	2. Disagree somehow	6. Strongly agree	6. Strongly agree	6. Strongly agree	Strongly agree	Strongly disagree	Strongly disagree	Moderately disagree	Strongly agree	Strongly disagree	Moderately agree	Moderately agree	Slightly disagree	Moderately disagree	Strongly agree	Moderately disagree	Strongly agree	Slightly disagree	Slightly agree	Strongly agree	Strongly agree	Slightly agree	Yes
Female	22	K.N.U.S.T	Bsc. Human Biology	3RD YEAR	CHRISTIANITY	1. Student	4. Agree a little	5. Agree somehow	1.Strongly disagree	2. Disagree somehow	5. Agree somehow	3. Disagree a little	5. Agree somehow	1.Strongly disagree	6. Strongly agree	6. Strongly agree	6. Strongly agree	1.Strongly disagree	6. Strongly agree	6. Strongly agree	6. Strongly agree	6. Strongly agree	6. Strongly agree	6. Strongly agree	6. Strongly agree	5. Agree somehow	1.Strongly disagree	6. Strongly agree	6. Strongly agree	5. Agree somehow	Strongly agree	Strongly disagree	Moderately agree	Moderately agree	Slightly agree	Slightly agree	Moderately agree	Slightly agree	Slightly agree	Strongly disagree	Slightly agree	Slightly agree	Moderately agree	Slightly agree	Strongly disagree	Strongly agree	Strongly agree	Moderately disagree	Yes
Female	18	K.N.U.S.T	Human biology(medicine)	1ST YEAR	CHRISTIANITY	1. Student	5. Agree somehow	2. Disagree somehow	2. Disagree somehow	2. Disagree somehow	1.Strongly disagree	1.Strongly disagree	2. Disagree somehow	1.Strongly disagree	2. Disagree somehow	6. Strongly agree	5. Agree somehow	1.Strongly disagree	3. Disagree a little	6. Strongly agree	5. Agree somehow	3. Disagree a little	4. Agree a little	4. Agree a little	6. Strongly agree	3. Disagree a little	4. Agree a little	6. Strongly agree	5. Agree somehow	2. Disagree somehow	Moderately agree	Strongly disagree	Strongly agree	Slightly agree	Moderately agree	Strongly agree	Slightly agree	Moderately agree	Moderately disagree	Moderately disagree	Slightly disagree	Strongly agree	Strongly agree	Slightly agree	Moderately agree	Moderately disagree	Strongly agree	Slightly disagree	Yes
Female	20	K.N.U.S.T	Human biology	3RD YEAR	ISLAMIC	1. Student	4. Agree a little	1.Strongly disagree	1.Strongly disagree	3. Disagree a little	1.Strongly disagree	1.Strongly disagree	6. Strongly agree	1.Strongly disagree	3. Disagree a little	6. Strongly agree	6. Strongly agree	3. Disagree a little	6. Strongly agree	6. Strongly agree	6. Strongly agree	5. Agree somehow	6. Strongly agree	4. Agree a little	6. Strongly agree	5. Agree somehow	4. Agree a little	5. Agree somehow	5. Agree somehow	4. Agree a little	Slightly agree	Slightly disagree	Moderately disagree	Slightly agree	Strongly agree	Slightly agree	Moderately disagree	Slightly disagree	Slightly agree	Moderately disagree	Slightly agree	Slightly agree	Moderately disagree	Moderately disagree	Strongly agree	Slightly agree	Moderately agree	Slightly agree	Yes
Male	20	K.N.U.S.T	Human Biology	3RD YEAR	CHRISTIANITY	1. Student	2. Disagree somehow	2. Disagree somehow	2. Disagree somehow	2. Disagree somehow	2. Disagree somehow	2. Disagree somehow	2. Disagree somehow	1.Strongly disagree	2. Disagree somehow	6. Strongly agree	6. Strongly agree	3. Disagree a little	5. Agree somehow	6. Strongly agree	6. Strongly agree	1.Strongly disagree	5. Agree somehow	5. Agree somehow	6. Strongly agree	3. Disagree a little	5. Agree somehow	5. Agree somehow	5. Agree somehow	5. Agree somehow	Strongly agree	Moderately agree	Slightly agree	Moderately disagree	Strongly agree	Moderately agree	Moderately agree	Moderately agree	Moderately disagree	Slightly agree	Slightly disagree	Moderately agree	Moderately agree	Moderately agree	Slightly agree	Moderately agree	Moderately agree	Slightly disagree	No
Male	18	K.N.U.S.T	Human Biology (Medicine)	1ST YEAR	CHRISTIANITY	1. Student	2. Disagree somehow	2. Disagree somehow	1.Strongly disagree	1.Strongly disagree	1.Strongly disagree	4. Agree a little	2. Disagree somehow	3. Disagree a little	4. Agree a little	6. Strongly agree	5. Agree somehow	3. Disagree a little	3. Disagree a little	5. Agree somehow	6. Strongly agree	5. Agree somehow	5. Agree somehow	5. Agree somehow	6. Strongly agree	3. Disagree a little	2. Disagree somehow	5. Agree somehow	5. Agree somehow	5. Agree somehow	Moderately agree	Moderately disagree	Slightly agree	Moderately disagree	Slightly agree	Moderately agree	Strongly agree	Slightly agree	Moderately disagree	Moderately disagree	Slightly disagree	Moderately agree	Moderately agree	Slightly agree	Slightly disagree	Strongly agree	Moderately agree	Slightly disagree	Yes
Male	20	K.N.U.S.T	Human biology	1ST YEAR	CHRISTIANITY	1. Student	2. Disagree somehow	2. Disagree somehow	1.Strongly disagree	4. Agree a little	3. Disagree a little	4. Agree a little	4. Agree a little	2. Disagree somehow	2. Disagree somehow	6. Strongly agree	4. Agree a little	2. Disagree somehow	4. Agree a little	5. Agree somehow	5. Agree somehow	1.Strongly disagree	3. Disagree a little	4. Agree a little	6. Strongly agree	4. Agree a little	1.Strongly disagree	6. Strongly agree	6. Strongly agree	6. Strongly agree	Moderately agree	Moderately disagree	Moderately disagree	Slightly agree	Strongly agree	Strongly agree	Strongly agree	Moderately agree	Moderately agree	Moderately disagree	Slightly agree	Slightly agree	Strongly agree	Slightly agree	Moderately disagree	Slightly agree	Moderately agree	Slightly agree	No
Male	24	K.N.U.S.T	Human Biology	3RD YEAR	CHRISTIANITY	1. Student	5. Agree somehow	1.Strongly disagree	1.Strongly disagree	1.Strongly disagree	1.Strongly disagree	1.Strongly disagree	1.Strongly disagree	1.Strongly disagree	1.Strongly disagree	6. Strongly agree	3. Disagree a little	1.Strongly disagree	2. Disagree somehow	6. Strongly agree	6. Strongly agree	1.Strongly disagree	6. Strongly agree	1.Strongly disagree	6. Strongly agree	2. Disagree somehow	1.Strongly disagree	5. Agree somehow	6. Strongly agree	6. Strongly agree	Slightly disagree	Strongly disagree	Strongly disagree	Moderately disagree	Moderately agree	Moderately agree	Moderately agree	Moderately agree	Strongly disagree	Strongly disagree	Strongly disagree	Moderately agree	Strongly agree	Moderately disagree	Strongly disagree	Strongly disagree	Strongly agree	Moderately disagree	No
Male	19	K.N.U.S.T	Human biology	1ST YEAR	CHRISTIANITY	1. Student	5. Agree somehow	1.Strongly disagree	1.Strongly disagree	6. Strongly agree	6. Strongly agree	4. Agree a little	6. Strongly agree	6. Strongly agree	3. Disagree a little	6. Strongly agree	6. Strongly agree	1.Strongly disagree	6. Strongly agree	6. Strongly agree	5. Agree somehow	3. Disagree a little	3. Disagree a little	6. Strongly agree	6. Strongly agree	6. Strongly agree	1.Strongly disagree	6. Strongly agree	4. Agree a little	6. Strongly agree	Slightly disagree	Moderately agree	Moderately disagree	Moderately disagree	Strongly agree	Slightly disagree	Slightly disagree	Strongly disagree	Moderately agree	Slightly disagree	Strongly agree	Moderately agree	Strongly agree	Moderately agree	Moderately agree	Slightly disagree	Moderately disagree	Strongly disagree	Yes
Female	20	K.N.U.S.T	Human biology	3RD YEAR	ISLAMIC	1. Student	4. Agree a little	1.Strongly disagree	1.Strongly disagree	3. Disagree a little	1.Strongly disagree	1.Strongly disagree	6. Strongly agree	1.Strongly disagree	3. Disagree a little	6. Strongly agree	6. Strongly agree	3. Disagree a little	6. Strongly agree	6. Strongly agree	6. Strongly agree	5. Agree somehow	6. Strongly agree	4. Agree a little	6. Strongly agree	5. Agree somehow	4. Agree a little	5. Agree somehow	5. Agree somehow	4. Agree a little	Slightly agree	Slightly disagree	Moderately disagree	Slightly agree	Strongly agree	Slightly agree	Moderately disagree	Slightly disagree	Slightly agree	Moderately disagree	Slightly agree	Slightly agree	Moderately disagree	Moderately disagree	Strongly agree	Slightly agree	Moderately agree	Slightly agree	Yes
Female	21	K.N.U.S.T	Human Biology (Medicine)	3RD YEAR	CHRISTIANITY	1. Student	5. Agree somehow	2. Disagree somehow	1.Strongly disagree	5. Agree somehow	1.Strongly disagree	3. Disagree a little	6. Strongly agree	1.Strongly disagree	1.Strongly disagree	6. Strongly agree	6. Strongly agree	1.Strongly disagree	5. Agree somehow	6. Strongly agree	6. Strongly agree	4. Agree a little	6. Strongly agree	6. Strongly agree	6. Strongly agree	2. Disagree somehow	2. Disagree somehow	6. Strongly agree	6. Strongly agree	6. Strongly agree	Moderately agree	Moderately disagree	Slightly disagree	Moderately disagree	Strongly agree	Slightly agree	Moderately agree	Slightly agree	Moderately disagree	Slightly disagree	Moderately disagree	Moderately agree	Strongly agree	Slightly agree	Slightly disagree	Strongly disagree	Strongly agree	Slightly disagree	Yes
Male	20	K.N.U.S.T	Bsc. Human Biology (MB.CH.B)	3RD YEAR	CHRISTIANITY	1. Student	1.Strongly disagree	1.Strongly disagree	1.Strongly disagree	1.Strongly disagree	1.Strongly disagree	1.Strongly disagree	6. Strongly agree	1.Strongly disagree	1.Strongly disagree	6. Strongly agree	6. Strongly agree	2. Disagree somehow	6. Strongly agree	6. Strongly agree	6. Strongly agree	1.Strongly disagree	4. Agree a little	4. Agree a little	6. Strongly agree	4. Agree a little	1.Strongly disagree	6. Strongly agree	6. Strongly agree	6. Strongly agree	Strongly agree	Strongly disagree	Slightly disagree	Strongly disagree	Strongly agree	Strongly agree	Strongly agree	Strongly disagree	Strongly disagree	Slightly disagree	Strongly disagree	Strongly agree	Strongly agree	Moderately disagree	Moderately agree	Strongly disagree	Strongly agree	Strongly agree	No
Female	21	K.N.U.S.T	Human biology	3RD YEAR	CHRISTIANITY	1. Student	1.Strongly disagree	6. Strongly agree	4. Agree a little	6. Strongly agree	2. Disagree somehow	6. Strongly agree	6. Strongly agree	1.Strongly disagree	6. Strongly agree	6. Strongly agree	6. Strongly agree	1.Strongly disagree	6. Strongly agree	6. Strongly agree	6. Strongly agree	1.Strongly disagree	4. Agree a little	6. Strongly agree	5. Agree somehow	4. Agree a little	2. Disagree somehow	6. Strongly agree	5. Agree somehow	5. Agree somehow	Strongly agree	Moderately disagree	Moderately agree	Slightly agree	Strongly agree	Strongly agree	Slightly agree	Strongly disagree	Strongly disagree	Strongly disagree	Strongly disagree	Moderately agree	Moderately agree	Slightly agree	Moderately disagree	Strongly disagree	Strongly agree	Slightly disagree	No
Female	20	K.N.U.S.T	Human biology	3RD YEAR	ISLAMIC	1. Student	4. Agree a little	1.Strongly disagree	1.Strongly disagree	3. Disagree a little	1.Strongly disagree	1.Strongly disagree	6. Strongly agree	1.Strongly disagree	3. Disagree a little	6. Strongly agree	6. Strongly agree	3. Disagree a little	6. Strongly agree	6. Strongly agree	6. Strongly agree	5. Agree somehow	6. Strongly agree	4. Agree a little	6. Strongly agree	5. Agree somehow	4. Agree a little	5. Agree somehow	5. Agree somehow	4. Agree a little	Slightly agree	Slightly disagree	Moderately disagree	Slightly agree	Strongly agree	Slightly agree	Moderately disagree	Slightly disagree	Slightly agree	Moderately disagree	Slightly agree	Slightly agree	Moderately disagree	Moderately disagree	Strongly agree	Slightly agree	Moderately agree	Slightly agree	Yes
Female	20	K.N.U.S.T	Human Biology	3RD YEAR	CHRISTIANITY	1. Student	3. Disagree a little	1.Strongly disagree	1.Strongly disagree	1.Strongly disagree	1.Strongly disagree	1.Strongly disagree	6. Strongly agree	1.Strongly disagree	1.Strongly disagree	6. Strongly agree	6. Strongly agree	1.Strongly disagree	6. Strongly agree	6. Strongly agree	6. Strongly agree	1.Strongly disagree	6. Strongly agree	5. Agree somehow	5. Agree somehow	1.Strongly disagree	1.Strongly disagree	6. Strongly agree	6. Strongly agree	6. Strongly agree	Strongly agree	Strongly disagree	Strongly disagree	Moderately disagree	Strongly agree	Strongly agree	Moderately agree	Strongly disagree	Strongly disagree	Strongly disagree	Strongly disagree	Strongly agree	Strongly agree	Slightly agree	Strongly disagree	Strongly disagree	Strongly agree	Slightly agree	Yes
Female	18	K.N.U.S.T	Human biology	1ST YEAR	CHRISTIANITY	1. Student	3. Disagree a little	2. Disagree somehow	2. Disagree somehow	2. Disagree somehow	4. Agree a little	2. Disagree somehow	6. Strongly agree	1.Strongly disagree	5. Agree somehow	6. Strongly agree	6. Strongly agree	3. Disagree a little	2. Disagree somehow	6. Strongly agree	6. Strongly agree	6. Strongly agree	5. Agree somehow	4. Agree a little	6. Strongly agree	4. Agree a little	2. Disagree somehow	6. Strongly agree	6. Strongly agree	6. Strongly agree	Strongly agree	Slightly disagree	Slightly disagree	Slightly disagree	Strongly agree	Moderately agree	Moderately agree	Slightly agree	Moderately agree	Slightly disagree	Slightly agree	Slightly agree	Moderately agree	Moderately agree	Slightly agree	Moderately agree	Strongly agree	Moderately disagree	Yes
Female	21	K.N.U.S.T	Human Biology	3RD YEAR	CHRISTIANITY	1. Student	2. Disagree somehow	2. Disagree somehow	1.Strongly disagree	2. Disagree somehow	2. Disagree somehow	1.Strongly disagree	5. Agree somehow	2. Disagree somehow	6. Strongly agree	6. Strongly agree	6. Strongly agree	1.Strongly disagree	6. Strongly agree	6. Strongly agree	6. Strongly agree	6. Strongly agree	4. Agree a little	6. Strongly agree	6. Strongly agree	1.Strongly disagree	1.Strongly disagree	6. Strongly agree	6. Strongly agree	5. Agree somehow	Strongly agree	Slightly disagree	Moderately disagree	Moderately agree	Slightly agree	Strongly agree	Moderately agree	Slightly agree	Moderately disagree	Moderately agree	Strongly disagree	Moderately agree	Moderately agree	Moderately agree	Strongly agree	Strongly disagree	Moderately agree	Slightly disagree	No
Male	22	K.N.U.S.T	Human Biology (MB.CHB)	3RD YEAR	CHRISTIANITY	1. Student	4. Agree a little	2. Disagree somehow	1.Strongly disagree	4. Agree a little	2. Disagree somehow	3. Disagree a little	4. Agree a little	1.Strongly disagree	5. Agree somehow	6. Strongly agree	5. Agree somehow	2. Disagree somehow	4. Agree a little	6. Strongly agree	6. Strongly agree	6. Strongly agree	6. Strongly agree	6. Strongly agree	6. Strongly agree	5. Agree somehow	5. Agree somehow	6. Strongly agree	6. Strongly agree	5. Agree somehow	Strongly agree	Slightly disagree	Strongly agree	Moderately agree	Moderately agree	Strongly agree	Strongly agree	Slightly agree	Moderately agree	Moderately agree	Slightly agree	Strongly agree	Strongly agree	Moderately agree	Moderately agree	Moderately agree	Strongly agree	Moderately agree	No
Female	20	K.N.U.S.T	Human biology	3RD YEAR	ISLAMIC	1. Student	4. Agree a little	1.Strongly disagree	1.Strongly disagree	3. Disagree a little	1.Strongly disagree	1.Strongly disagree	6. Strongly agree	1.Strongly disagree	3. Disagree a little	6. Strongly agree	6. Strongly agree	3. Disagree a little	6. Strongly agree	6. Strongly agree	6. Strongly agree	5. Agree somehow	6. Strongly agree	4. Agree a little	6. Strongly agree	5. Agree somehow	4. Agree a little	5. Agree somehow	5. Agree somehow	4. Agree a little	Slightly agree	Slightly disagree	Moderately disagree	Slightly agree	Strongly agree	Slightly agree	Moderately disagree	Slightly disagree	Slightly agree	Moderately disagree	Slightly agree	Slightly agree	Moderately disagree	Moderately disagree	Strongly agree	Slightly agree	Moderately agree	Slightly agree	Yes
Male	20	K.N.U.S.T	Bsc Physician Assistantship	2ND YEAR	CHRISTIANITY	1. Student	4. Agree a little	1.Strongly disagree	1.Strongly disagree	4. Agree a little	4. Agree a little	4. Agree a little	5. Agree somehow	1.Strongly disagree	1.Strongly disagree	5. Agree somehow	6. Strongly agree	1.Strongly disagree	1.Strongly disagree	6. Strongly agree	5. Agree somehow	6. Strongly agree	6. Strongly agree	6. Strongly agree	6. Strongly agree	5. Agree somehow	1.Strongly disagree	6. Strongly agree	5. Agree somehow	4. Agree a little	Strongly agree	Strongly disagree	Strongly agree	Moderately agree	Strongly agree	Strongly agree	Strongly agree	Slightly agree	Slightly disagree	Strongly agree	Strongly agree	Strongly agree	Strongly agree	Slightly agree	Strongly disagree	Strongly agree	Strongly agree	Strongly agree	No
Male	22	K.N.U.S.T	BSC PHYSICIAN ASSISTANTSHIP	2ND YEAR	CHRISTIANITY	1. Student	3. Disagree a little	6. Strongly agree	1.Strongly disagree	2. Disagree somehow	2. Disagree somehow	4. Agree a little	1.Strongly disagree	1.Strongly disagree	2. Disagree somehow	6. Strongly agree	6. Strongly agree	1.Strongly disagree	6. Strongly agree	6. Strongly agree	6. Strongly agree	1.Strongly disagree	4. Agree a little	6. Strongly agree	6. Strongly agree	4. Agree a little	1.Strongly disagree	6. Strongly agree	6. Strongly agree	6. Strongly agree	Moderately agree	Strongly disagree	Slightly agree	Strongly disagree	Strongly agree	Strongly agree	Slightly agree	Moderately agree	Strongly disagree	Strongly disagree	Strongly disagree	Strongly agree	Strongly agree	Moderately agree	Strongly disagree	Strongly disagree	Strongly agree	Slightly agree	No
Male	22	K.N.U.S.T	HUMAN BIOLOGY	3RD YEAR	CHRISTIANITY	1. Student	1.Strongly disagree	1.Strongly disagree	1.Strongly disagree	1.Strongly disagree	1.Strongly disagree	2. Disagree somehow	2. Disagree somehow	2. Disagree somehow	2. Disagree somehow	2. Disagree somehow	2. Disagree somehow	3. Disagree a little	3. Disagree a little	3. Disagree a little	3. Disagree a little	2. Disagree somehow	2. Disagree somehow	2. Disagree somehow	2. Disagree somehow	2. Disagree somehow	2. Disagree somehow	3. Disagree a little	3. Disagree a little	3. Disagree a little	Moderately disagree	Moderately disagree	Moderately disagree	Strongly disagree	Strongly disagree	Moderately disagree	Moderately disagree	Moderately disagree	Slightly disagree	Slightly agree	Slightly disagree	Slightly disagree	Moderately disagree	Slightly disagree	Slightly agree	Slightly disagree	Moderately disagree	Slightly disagree	No
Male	22	K.N.U.S.T	Bsc. Human Biology Mb.Ch.B ( Medicine )	3RD YEAR	CHRISTIANITY	1. Student	4. Agree a little	1.Strongly disagree	1.Strongly disagree	2. Disagree somehow	1.Strongly disagree	2. Disagree somehow	6. Strongly agree	1.Strongly disagree	3. Disagree a little	1.Strongly disagree	4. Agree a little	1.Strongly disagree	6. Strongly agree	6. Strongly agree	6. Strongly agree	1.Strongly disagree	4. Agree a little	6. Strongly agree	6. Strongly agree	4. Agree a little	1.Strongly disagree	6. Strongly agree	5. Agree somehow	6. Strongly agree	Moderately agree	Moderately disagree	Slightly agree	Moderately agree	Moderately agree	Slightly agree	Slightly agree	Moderately disagree	Strongly disagree	Slightly agree	Moderately disagree	Moderately agree	Strongly disagree	Slightly agree	Moderately disagree	Moderately disagree	Moderately agree	Slightly disagree	No
Male	19	K.N.U.S.T	Human Biology(Medicine)	1ST YEAR	CHRISTIANITY	1. Student	2. Disagree somehow	1.Strongly disagree	2. Disagree somehow	1.Strongly disagree	1.Strongly disagree	3. Disagree a little	1.Strongly disagree	2. Disagree somehow	4. Agree a little	6. Strongly agree	6. Strongly agree	1.Strongly disagree	6. Strongly agree	6. Strongly agree	6. Strongly agree	1.Strongly disagree	5. Agree somehow	3. Disagree a little	5. Agree somehow	1.Strongly disagree	1.Strongly disagree	3. Disagree a little	5. Agree somehow	6. Strongly agree	Slightly disagree	Slightly disagree	Moderately disagree	Slightly disagree	Moderately disagree	Slightly disagree	Slightly agree	Moderately disagree	Strongly disagree	Strongly disagree	Moderately disagree	Moderately agree	Moderately agree	Slightly agree	Strongly disagree	Moderately disagree	Strongly agree	Moderately disagree	No
Female	20	K.N.U.S.T	Human biology	3RD YEAR	ISLAMIC	1. Student	4. Agree a little	1.Strongly disagree	1.Strongly disagree	3. Disagree a little	1.Strongly disagree	1.Strongly disagree	6. Strongly agree	1.Strongly disagree	3. Disagree a little	6. Strongly agree	6. Strongly agree	3. Disagree a little	6. Strongly agree	6. Strongly agree	6. Strongly agree	5. Agree somehow	6. Strongly agree	4. Agree a little	6. Strongly agree	5. Agree somehow	4. Agree a little	5. Agree somehow	5. Agree somehow	4. Agree a little	Slightly agree	Slightly disagree	Moderately disagree	Slightly agree	Strongly agree	Slightly agree	Moderately disagree	Slightly disagree	Slightly agree	Moderately disagree	Slightly agree	Slightly agree	Moderately disagree	Moderately disagree	Strongly agree	Slightly agree	Moderately agree	Slightly agree	Yes
Male	21	K.N.U.S.T	BSC. HUMAN BIOLOGY	3RD YEAR	CHRISTIANITY	1. Student	2. Disagree somehow	2. Disagree somehow	1.Strongly disagree	3. Disagree a little	2. Disagree somehow	3. Disagree a little	3. Disagree a little	1.Strongly disagree	3. Disagree a little	6. Strongly agree	6. Strongly agree	1.Strongly disagree	4. Agree a little	5. Agree somehow	5. Agree somehow	4. Agree a little	5. Agree somehow	5. Agree somehow	6. Strongly agree	1.Strongly disagree	1.Strongly disagree	6. Strongly agree	6. Strongly agree	6. Strongly agree	Strongly agree	Moderately disagree	Strongly disagree	Moderately agree	Slightly agree	Moderately agree	Slightly agree	Moderately agree	Strongly disagree	Strongly disagree	Strongly disagree	Moderately disagree	Moderately agree	Moderately disagree	Strongly disagree	Slightly agree	Moderately agree	Moderately disagree	No
Male	20	K.N.U.S.T	Human biology	3RD YEAR	CHRISTIANITY	1. Student	5. Agree somehow	1.Strongly disagree	1.Strongly disagree	1.Strongly disagree	2. Disagree somehow	1.Strongly disagree	4. Agree a little	1.Strongly disagree	1.Strongly disagree	6. Strongly agree	4. Agree a little	2. Disagree somehow	3. Disagree a little	6. Strongly agree	6. Strongly agree	4. Agree a little	6. Strongly agree	5. Agree somehow	5. Agree somehow	2. Disagree somehow	3. Disagree a little	5. Agree somehow	5. Agree somehow	5. Agree somehow	Moderately agree	Moderately disagree	Moderately disagree	Slightly disagree	Strongly agree	Strongly agree	Moderately agree	Moderately disagree	Slightly disagree	Slightly agree	Moderately agree	Moderately agree	Strongly agree	Moderately agree	Moderately disagree	Slightly agree	Strongly agree	Moderately agree	Yes
Female	19	K.N.U.S.T	Bsc physician assistantship	2ND YEAR	CHRISTIANITY	1. Student	5. Agree somehow	2. Disagree somehow	3. Disagree a little	4. Agree a little	2. Disagree somehow	3. Disagree a little	3. Disagree a little	3. Disagree a little	4. Agree a little	4. Agree a little	4. Agree a little	1.Strongly disagree	3. Disagree a little	3. Disagree a little	4. Agree a little	4. Agree a little	4. Agree a little	5. Agree somehow	4. Agree a little	3. Disagree a little	3. Disagree a little	3. Disagree a little	3. Disagree a little	3. Disagree a little	Moderately disagree	Moderately disagree	Slightly agree	Moderately disagree	Slightly agree	Slightly agree	Moderately agree	Strongly disagree	Slightly disagree	Slightly disagree	Strongly disagree	Moderately agree	Moderately agree	Strongly disagree	Moderately disagree	Strongly agree	Slightly agree	Slightly disagree	Yes
Female	22	K.N.U.S.T	Human biology MB CHB	3RD YEAR	CHRISTIANITY	1. Student	2. Disagree somehow	4. Agree a little	3. Disagree a little	2. Disagree somehow	2. Disagree somehow	4. Agree a little	4. Agree a little	1.Strongly disagree	4. Agree a little	6. Strongly agree	6. Strongly agree	1.Strongly disagree	6. Strongly agree	6. Strongly agree	6. Strongly agree	4. Agree a little	6. Strongly agree	6. Strongly agree	6. Strongly agree	5. Agree somehow	1.Strongly disagree	6. Strongly agree	6. Strongly agree	6. Strongly agree	Moderately agree	Moderately disagree	Slightly disagree	Moderately disagree	Strongly disagree	Moderately agree	Moderately disagree	Moderately disagree	Strongly disagree	Strongly disagree	Slightly agree	Moderately agree	Strongly agree	Slightly agree	Moderately disagree	Moderately disagree	Strongly agree	Slightly disagree	Yes
Female	20	K.N.U.S.T	Human biology	3RD YEAR	ISLAMIC	1. Student	4. Agree a little	1.Strongly disagree	1.Strongly disagree	3. Disagree a little	1.Strongly disagree	1.Strongly disagree	6. Strongly agree	1.Strongly disagree	3. Disagree a little	6. Strongly agree	6. Strongly agree	3. Disagree a little	6. Strongly agree	6. Strongly agree	6. Strongly agree	5. Agree somehow	6. Strongly agree	4. Agree a little	6. Strongly agree	5. Agree somehow	4. Agree a little	5. Agree somehow	5. Agree somehow	4. Agree a little	Slightly agree	Slightly disagree	Moderately disagree	Slightly agree	Strongly agree	Slightly agree	Moderately disagree	Slightly disagree	Slightly agree	Moderately disagree	Slightly agree	Slightly agree	Moderately disagree	Moderately disagree	Strongly agree	Slightly agree	Moderately agree	Slightly agree	Yes
Female	20	K.N.U.S.T	Human Biology	3RD YEAR	CHRISTIANITY	1. Student	4. Agree a little	2. Disagree somehow	1.Strongly disagree	1.Strongly disagree	1.Strongly disagree	2. Disagree somehow	5. Agree somehow	1.Strongly disagree	1.Strongly disagree	6. Strongly agree	6. Strongly agree	1.Strongly disagree	6. Strongly agree	6. Strongly agree	6. Strongly agree	6. Strongly agree	6. Strongly agree	6. Strongly agree	6. Strongly agree	2. Disagree somehow	2. Disagree somehow	6. Strongly agree	6. Strongly agree	6. Strongly agree	Slightly disagree	Moderately disagree	Slightly disagree	Strongly disagree	Strongly agree	Moderately agree	Slightly agree	Moderately disagree	Moderately disagree	Strongly disagree	Strongly disagree	Strongly agree	Moderately agree	Slightly agree	Strongly disagree	Moderately disagree	Strongly agree	Moderately disagree	Yes
Male	21	K.N.U.S.T	Bsc. Human Biology	3RD YEAR	CHRISTIANITY	1. Student	2. Disagree somehow	4. Agree a little	2. Disagree somehow	2. Disagree somehow	2. Disagree somehow	2. Disagree somehow	4. Agree a little	1.Strongly disagree	2. Disagree somehow	6. Strongly agree	4. Agree a little	2. Disagree somehow	2. Disagree somehow	6. Strongly agree	6. Strongly agree	2. Disagree somehow	5. Agree somehow	4. Agree a little	6. Strongly agree	4. Agree a little	1.Strongly disagree	5. Agree somehow	5. Agree somehow	4. Agree a little	Slightly agree	Slightly agree	Moderately agree	Slightly disagree	Slightly agree	Moderately agree	Strongly agree	Slightly disagree	Moderately disagree	Strongly agree	Moderately disagree	Slightly agree	Strongly agree	Moderately agree	Slightly agree	Moderately disagree	Strongly agree	Moderately disagree	No
Female	21	K.N.U.S.T	Human Biology	3RD YEAR	CHRISTIANITY	1. Student	3. Disagree a little	1.Strongly disagree	1.Strongly disagree	1.Strongly disagree	1.Strongly disagree	4. Agree a little	4. Agree a little	1.Strongly disagree	1.Strongly disagree	6. Strongly agree	4. Agree a little	1.Strongly disagree	6. Strongly agree	4. Agree a little	6. Strongly agree	2. Disagree somehow	4. Agree a little	6. Strongly agree	6. Strongly agree	2. Disagree somehow	1.Strongly disagree	5. Agree somehow	5. Agree somehow	6. Strongly agree	Slightly agree	Strongly disagree	Moderately disagree	Slightly disagree	Moderately agree	Strongly agree	Slightly agree	Slightly disagree	Moderately disagree	Slightly disagree	Strongly disagree	Strongly agree	Strongly agree	Moderately disagree	Moderately disagree	Strongly disagree	Strongly agree	Slightly disagree	Yes
Male	19	K.N.U.S.T	Bsc. Human Biology ( Medicine)	3RD YEAR	CHRISTIANITY	1. Student	4. Agree a little	4. Agree a little	1.Strongly disagree	2. Disagree somehow	1.Strongly disagree	1.Strongly disagree	4. Agree a little	3. Disagree a little	3. Disagree a little	6. Strongly agree	6. Strongly agree	1.Strongly disagree	3. Disagree a little	6. Strongly agree	6. Strongly agree	6. Strongly agree	6. Strongly agree	6. Strongly agree	6. Strongly agree	2. Disagree somehow	1.Strongly disagree	6. Strongly agree	6. Strongly agree	6. Strongly agree	Strongly agree	Strongly disagree	Moderately agree	Moderately agree	Slightly disagree	Strongly agree	Strongly disagree	Strongly disagree	Strongly disagree	Slightly disagree	Strongly disagree	Strongly agree	Strongly agree	Slightly agree	Strongly disagree	Strongly disagree	Strongly agree	Moderately disagree	Yes
Female	20	K.N.U.S.T	Human biology	3RD YEAR	ISLAMIC	1. Student	4. Agree a little	1.Strongly disagree	1.Strongly disagree	3. Disagree a little	1.Strongly disagree	1.Strongly disagree	6. Strongly agree	1.Strongly disagree	3. Disagree a little	6. Strongly agree	6. Strongly agree	3. Disagree a little	6. Strongly agree	6. Strongly agree	6. Strongly agree	5. Agree somehow	6. Strongly agree	4. Agree a little	6. Strongly agree	5. Agree somehow	4. Agree a little	5. Agree somehow	5. Agree somehow	4. Agree a little	Slightly agree	Slightly disagree	Moderately disagree	Slightly agree	Strongly agree	Slightly agree	Moderately disagree	Slightly disagree	Slightly agree	Moderately disagree	Slightly agree	Slightly agree	Moderately disagree	Moderately disagree	Strongly agree	Slightly agree	Moderately agree	Slightly agree	Yes
Male	19	K.N.U.S.T	Human biology	3RD YEAR	CHRISTIANITY	1. Student	4. Agree a little	2. Disagree somehow	1.Strongly disagree	1.Strongly disagree	2. Disagree somehow	5. Agree somehow	6. Strongly agree	1.Strongly disagree	4. Agree a little	6. Strongly agree	6. Strongly agree	2. Disagree somehow	5. Agree somehow	6. Strongly agree	6. Strongly agree	6. Strongly agree	3. Disagree a little	5. Agree somehow	6. Strongly agree	5. Agree somehow	2. Disagree somehow	6. Strongly agree	6. Strongly agree	5. Agree somehow	Strongly agree	Strongly disagree	Moderately disagree	Strongly disagree	Moderately agree	Moderately agree	Slightly disagree	Moderately disagree	Strongly disagree	Slightly disagree	Strongly disagree	Strongly agree	Strongly agree	Slightly agree	Strongly disagree	Strongly disagree	Strongly agree	Moderately disagree	Yes
Male	21	K.N.U.S.T	HUMAN BIOLOGY	3RD YEAR	CHRISTIANITY	1. Student	4. Agree a little	3. Disagree a little	1.Strongly disagree	4. Agree a little	1.Strongly disagree	3. Disagree a little	5. Agree somehow	1.Strongly disagree	2. Disagree somehow	6. Strongly agree	6. Strongly agree	1.Strongly disagree	4. Agree a little	6. Strongly agree	6. Strongly agree	4. Agree a little	5. Agree somehow	5. Agree somehow	6. Strongly agree	3. Disagree a little	2. Disagree somehow	5. Agree somehow	6. Strongly agree	6. Strongly agree	Moderately agree	Moderately disagree	Slightly disagree	Strongly disagree	Slightly agree	Moderately disagree	Moderately agree	Slightly agree	Slightly agree	Moderately disagree	Slightly disagree	Slightly agree	Strongly agree	Moderately agree	Slightly disagree	Moderately agree	Moderately agree	Moderately agree	Yes
Female	20	K.N.U.S.T	BSc.Human biology	3RD YEAR	CHRISTIANITY	1. Student	5. Agree somehow	1.Strongly disagree	1.Strongly disagree	4. Agree a little	1.Strongly disagree	1.Strongly disagree	6. Strongly agree	1.Strongly disagree	1.Strongly disagree	1.Strongly disagree	6. Strongly agree	1.Strongly disagree	6. Strongly agree	6. Strongly agree	6. Strongly agree	1.Strongly disagree	6. Strongly agree	6. Strongly agree	6. Strongly agree	5. Agree somehow	1.Strongly disagree	6. Strongly agree	6. Strongly agree	6. Strongly agree	Strongly disagree	Strongly disagree	Slightly disagree	Strongly disagree	Moderately agree	Strongly agree	Strongly disagree	Strongly disagree	Strongly disagree	Strongly disagree	Strongly disagree	Strongly agree	Strongly agree	Slightly agree	Strongly disagree	Strongly disagree	Strongly agree	Strongly disagree	Yes
Female	17	K.N.U.S.T	Human Biology	1ST YEAR	CHRISTIANITY	1. Student	5. Agree somehow	4. Agree a little	1.Strongly disagree	4. Agree a little	3. Disagree a little	3. Disagree a little	4. Agree a little	1.Strongly disagree	3. Disagree a little	1.Strongly disagree	3. Disagree a little	2. Disagree somehow	3. Disagree a little	6. Strongly agree	6. Strongly agree	6. Strongly agree	6. Strongly agree	6. Strongly agree	6. Strongly agree	3. Disagree a little	1.Strongly disagree	6. Strongly agree	6. Strongly agree	6. Strongly agree	Strongly agree	Strongly disagree	Strongly disagree	Moderately agree	Slightly agree	Strongly agree	Moderately agree	Moderately disagree	Slightly agree	Moderately agree	Moderately agree	Moderately agree	Moderately agree	Moderately agree	Strongly disagree	Slightly disagree	Strongly agree	Strongly agree	Yes
Male	22	K.N.U.S.T	Human Biology	3RD YEAR	CHRISTIANITY	1. Student	1.Strongly disagree	4. Agree a little	1.Strongly disagree	4. Agree a little	1.Strongly disagree	5. Agree somehow	6. Strongly agree	1.Strongly disagree	4. Agree a little	6. Strongly agree	6. Strongly agree	2. Disagree somehow	5. Agree somehow	6. Strongly agree	6. Strongly agree	1.Strongly disagree	4. Agree a little	5. Agree somehow	6. Strongly agree	5. Agree somehow	2. Disagree somehow	6. Strongly agree	6. Strongly agree	5. Agree somehow	Moderately agree	Moderately disagree	Slightly agree	Moderately disagree	Moderately agree	Moderately agree	Moderately agree	Slightly agree	Slightly agree	Slightly agree	Moderately disagree	Moderately agree	Strongly agree	Moderately agree	Slightly agree	Strongly agree	Moderately agree	Moderately agree	No
Male	21	K.N.U.S.T	Human Biology (Medicine)	3RD YEAR	CHRISTIANITY	1. Student	1.Strongly disagree	2. Disagree somehow	1.Strongly disagree	1.Strongly disagree	1.Strongly disagree	1.Strongly disagree	5. Agree somehow	1.Strongly disagree	2. Disagree somehow	6. Strongly agree	2. Disagree somehow	1.Strongly disagree	5. Agree somehow	5. Agree somehow	6. Strongly agree	4. Agree a little	5. Agree somehow	5. Agree somehow	5. Agree somehow	4. Agree a little	2. Disagree somehow	5. Agree somehow	4. Agree a little	4. Agree a little	Slightly agree	Slightly disagree	Slightly agree	Slightly agree	Slightly disagree	Slightly agree	Slightly disagree	Slightly disagree	Moderately disagree	Slightly disagree	Slightly agree	Slightly agree	Slightly agree	Slightly disagree	Slightly agree	Moderately agree	Slightly agree	Moderately disagree	No
Male	22	K.N.U.S.T	HUMAN BIOLOGY(MEDICINE)	1ST YEAR	CHRISTIANITY	1. Student	1.Strongly disagree	2. Disagree somehow	3. Disagree a little	6. Strongly agree	3. Disagree a little	5. Agree somehow	1.Strongly disagree	1.Strongly disagree	4. Agree a little	5. Agree somehow	6. Strongly agree	3. Disagree a little	3. Disagree a little	5. Agree somehow	5. Agree somehow	2. Disagree somehow	5. Agree somehow	2. Disagree somehow	6. Strongly agree	6. Strongly agree	1.Strongly disagree	6. Strongly agree	6. Strongly agree	6. Strongly agree	Moderately agree	Strongly disagree	Moderately agree	Moderately disagree	Strongly agree	Slightly disagree	Moderately disagree	Moderately agree	Moderately disagree	Moderately disagree	Moderately agree	Moderately agree	Moderately agree	Slightly disagree	Strongly disagree	Strongly agree	Moderately agree	Moderately agree	No
Female	22	K.N.U.S.T	Human biology MB CHB	3RD YEAR	CHRISTIANITY	1. Student	2. Disagree somehow	4. Agree a little	3. Disagree a little	2. Disagree somehow	2. Disagree somehow	4. Agree a little	4. Agree a little	1.Strongly disagree	4. Agree a little	6. Strongly agree	6. Strongly agree	1.Strongly disagree	6. Strongly agree	6. Strongly agree	6. Strongly agree	4. Agree a little	6. Strongly agree	6. Strongly agree	6. Strongly agree	5. Agree somehow	1.Strongly disagree	6. Strongly agree	6. Strongly agree	6. Strongly agree	Moderately agree	Moderately disagree	Slightly disagree	Moderately disagree	Strongly disagree	Moderately agree	Moderately disagree	Moderately disagree	Strongly disagree	Strongly disagree	Slightly agree	Moderately agree	Strongly agree	Slightly agree	Moderately disagree	Moderately disagree	Strongly agree	Slightly disagree	Yes
Male	21	K.N.U.S.T	BSc. PHYSICIAN ASSISTANTSHIP	2ND YEAR	CHRISTIANITY	1. Student	1.Strongly disagree	1.Strongly disagree	1.Strongly disagree	1.Strongly disagree	1.Strongly disagree	1.Strongly disagree	1.Strongly disagree	1.Strongly disagree	1.Strongly disagree	6. Strongly agree	6. Strongly agree	1.Strongly disagree	1.Strongly disagree	6. Strongly agree	6. Strongly agree	1.Strongly disagree	6. Strongly agree	1.Strongly disagree	6. Strongly agree	1.Strongly disagree	5. Agree somehow	5. Agree somehow	6. Strongly agree	6. Strongly agree	Moderately agree	Slightly agree	Slightly disagree	Slightly agree	Strongly agree	Strongly agree	Moderately agree	Slightly agree	Slightly agree	Slightly disagree	Slightly agree	Slightly agree	Moderately agree	Moderately agree	Slightly agree	Strongly agree	Strongly agree	Slightly agree	No
Male	21	K.N.U.S.T	BSc Physician Assistantship	2ND YEAR	CHRISTIANITY	1. Student	6. Strongly agree	1.Strongly disagree	1.Strongly disagree	5. Agree somehow	3. Disagree a little	3. Disagree a little	1.Strongly disagree	1.Strongly disagree	1.Strongly disagree	6. Strongly agree	6. Strongly agree	1.Strongly disagree	6. Strongly agree	6. Strongly agree	5. Agree somehow	6. Strongly agree	6. Strongly agree	5. Agree somehow	5. Agree somehow	5. Agree somehow	1.Strongly disagree	6. Strongly agree	4. Agree a little	6. Strongly agree	Moderately agree	Strongly disagree	Strongly agree	Strongly disagree	Strongly agree	Strongly agree	Moderately agree	Moderately agree	Slightly agree	Slightly agree	Moderately agree	Moderately agree	Strongly agree	Strongly agree	Strongly disagree	Moderately agree	Strongly agree	Moderately agree	Yes
Male	21	K.N.U.S.T	human biology	3RD YEAR	CHRISTIANITY	1. Student	1.Strongly disagree	1.Strongly disagree	1.Strongly disagree	1.Strongly disagree	1.Strongly disagree	1.Strongly disagree	6. Strongly agree	1.Strongly disagree	1.Strongly disagree	6. Strongly agree	6. Strongly agree	1.Strongly disagree	1.Strongly disagree	6. Strongly agree	6. Strongly agree	6. Strongly agree	6. Strongly agree	6. Strongly agree	6. Strongly agree	2. Disagree somehow	1.Strongly disagree	6. Strongly agree	5. Agree somehow	5. Agree somehow	Moderately agree	Strongly disagree	Moderately agree	Moderately agree	Slightly disagree	Slightly agree	Slightly agree	Slightly disagree	Strongly disagree	Strongly disagree	Strongly disagree	Moderately agree	Moderately agree	Slightly agree	Strongly disagree	Slightly agree	Moderately agree	Slightly disagree	No
Female	21	K.N.U.S.T	Human biology	3RD YEAR	CHRISTIANITY	1. Student	3. Disagree a little	2. Disagree somehow	1.Strongly disagree	3. Disagree a little	2. Disagree somehow	2. Disagree somehow	6. Strongly agree	3. Disagree a little	5. Agree somehow	6. Strongly agree	6. Strongly agree	1.Strongly disagree	6. Strongly agree	6. Strongly agree	6. Strongly agree	4. Agree a little	4. Agree a little	6. Strongly agree	6. Strongly agree	6. Strongly agree	3. Disagree a little	6. Strongly agree	3. Disagree a little	5. Agree somehow	Strongly agree	Moderately disagree	Slightly disagree	Strongly disagree	Strongly agree	Slightly agree	Slightly agree	Moderately disagree	Strongly disagree	Strongly disagree	Strongly disagree	Moderately agree	Moderately agree	Slightly agree	Moderately agree	Moderately disagree	Moderately agree	Strongly agree	No
Female	20	K.N.U.S.T	Human Biology	3RD YEAR	CHRISTIANITY	1. Student	4. Agree a little	1.Strongly disagree	1.Strongly disagree	4. Agree a little	1.Strongly disagree	2. Disagree somehow	5. Agree somehow	1.Strongly disagree	1.Strongly disagree	6. Strongly agree	6. Strongly agree	1.Strongly disagree	3. Disagree a little	5. Agree somehow	6. Strongly agree	5. Agree somehow	6. Strongly agree	6. Strongly agree	6. Strongly agree	1.Strongly disagree	1.Strongly disagree	6. Strongly agree	6. Strongly agree	6. Strongly agree	Moderately agree	Moderately disagree	Slightly disagree	Moderately disagree	Strongly agree	Strongly agree	Moderately agree	Slightly agree	Moderately disagree	Strongly agree	Strongly disagree	Moderately agree	Moderately agree	Moderately agree	Slightly agree	Slightly disagree	Strongly agree	Moderately agree	Yes
Female	20	K.N.U.S.T	Human Biology	3RD YEAR	CHRISTIANITY	1. Student	4. Agree a little	1.Strongly disagree	1.Strongly disagree	4. Agree a little	1.Strongly disagree	2. Disagree somehow	5. Agree somehow	1.Strongly disagree	1.Strongly disagree	6. Strongly agree	6. Strongly agree	1.Strongly disagree	3. Disagree a little	5. Agree somehow	6. Strongly agree	5. Agree somehow	6. Strongly agree	6. Strongly agree	6. Strongly agree	1.Strongly disagree	1.Strongly disagree	6. Strongly agree	6. Strongly agree	6. Strongly agree	Moderately agree	Moderately disagree	Slightly disagree	Moderately disagree	Strongly agree	Strongly agree	Moderately agree	Slightly agree	Moderately disagree	Strongly agree	Strongly disagree	Moderately agree	Moderately agree	Moderately agree	Slightly agree	Slightly disagree	Strongly agree	Moderately agree	Yes
Female	21	K.N.U.S.T	Human Biology	3RD YEAR	CHRISTIANITY	1. Student	3. Disagree a little	1.Strongly disagree	1.Strongly disagree	1.Strongly disagree	1.Strongly disagree	1.Strongly disagree	2. Disagree somehow	1.Strongly disagree	1.Strongly disagree	6. Strongly agree	6. Strongly agree	1.Strongly disagree	2. Disagree somehow	6. Strongly agree	6. Strongly agree	6. Strongly agree	6. Strongly agree	5. Agree somehow	6. Strongly agree	2. Disagree somehow	2. Disagree somehow	6. Strongly agree	6. Strongly agree	6. Strongly agree	Strongly agree	Strongly disagree	Moderately disagree	Strongly disagree	Strongly agree	Strongly agree	Strongly agree	Moderately agree	Strongly disagree	Strongly disagree	Strongly disagree	Strongly agree	Strongly agree	Moderately agree	Strongly disagree	Strongly disagree	Strongly agree	Slightly disagree	Yes
Female	21	K.N.U.S.T	Human biology	3RD YEAR	CHRISTIANITY	1. Student	2. Disagree somehow	2. Disagree somehow	1.Strongly disagree	5. Agree somehow	2. Disagree somehow	4. Agree a little	6. Strongly agree	1.Strongly disagree	5. Agree somehow	6. Strongly agree	6. Strongly agree	1.Strongly disagree	6. Strongly agree	6. Strongly agree	6. Strongly agree	2. Disagree somehow	4. Agree a little	2. Disagree somehow	6. Strongly agree	4. Agree a little	1.Strongly disagree	6. Strongly agree	4. Agree a little	6. Strongly agree	Moderately agree	Strongly disagree	Slightly disagree	Slightly agree	Slightly agree	Moderately agree	Moderately agree	Slightly disagree	Slightly agree	Moderately disagree	Slightly disagree	Slightly disagree	Strongly agree	Slightly agree	Slightly disagree	Slightly disagree	Strongly agree	Slightly agree	Yes
Female	19	K.N.U.S.T	Human Biology	1ST YEAR	CHRISTIANITY	1. Student	5. Agree somehow	3. Disagree a little	2. Disagree somehow	5. Agree somehow	5. Agree somehow	2. Disagree somehow	5. Agree somehow	4. Agree a little	6. Strongly agree	6. Strongly agree	6. Strongly agree	4. Agree a little	6. Strongly agree	5. Agree somehow	5. Agree somehow	1.Strongly disagree	4. Agree a little	5. Agree somehow	5. Agree somehow	5. Agree somehow	2. Disagree somehow	5. Agree somehow	6. Strongly agree	6. Strongly agree	Strongly agree	Moderately disagree	Moderately agree	Slightly agree	Strongly agree	Strongly agree	Slightly agree	Strongly agree	Moderately agree	Moderately agree	Moderately agree	Strongly agree	Strongly agree	Moderately agree	Slightly agree	Strongly agree	Strongly agree	Strongly agree	Yes
Male	21	K.N.U.S.T	Bsc. Human Biology	3RD YEAR	CHRISTIANITY	1. Student	5. Agree somehow	1.Strongly disagree	1.Strongly disagree	6. Strongly agree	1.Strongly disagree	1.Strongly disagree	1.Strongly disagree	1.Strongly disagree	2. Disagree somehow	1.Strongly disagree	6. Strongly agree	5. Agree somehow	3. Disagree a little	6. Strongly agree	6. Strongly agree	6. Strongly agree	5. Agree somehow	5. Agree somehow	6. Strongly agree	1.Strongly disagree	1.Strongly disagree	3. Disagree a little	5. Agree somehow	5. Agree somehow	Strongly disagree	Moderately disagree	Slightly disagree	Moderately disagree	Strongly agree	Strongly disagree	Moderately disagree	Strongly disagree	Strongly disagree	Strongly disagree	Strongly disagree	Moderately agree	Moderately agree	Slightly agree	Moderately disagree	Moderately disagree	Moderately disagree	Moderately disagree	Yes
Male	21	K.N.U.S.T	Bsc. Human Biology	3RD YEAR	CHRISTIANITY	1. Student	2. Disagree somehow	4. Agree a little	2. Disagree somehow	2. Disagree somehow	2. Disagree somehow	2. Disagree somehow	4. Agree a little	1.Strongly disagree	2. Disagree somehow	6. Strongly agree	4. Agree a little	2. Disagree somehow	2. Disagree somehow	6. Strongly agree	6. Strongly agree	2. Disagree somehow	5. Agree somehow	4. Agree a little	6. Strongly agree	4. Agree a little	1.Strongly disagree	5. Agree somehow	5. Agree somehow	4. Agree a little	Slightly agree	Slightly agree	Moderately agree	Slightly disagree	Slightly agree	Moderately agree	Strongly agree	Slightly disagree	Moderately disagree	Strongly agree	Moderately disagree	Slightly agree	Strongly agree	Moderately agree	Slightly agree	Moderately disagree	Strongly agree	Moderately disagree	No
Male	20	K.N.U.S.T	Medicine	3RD YEAR	CHRISTIANITY	1. Student	2. Disagree somehow	1.Strongly disagree	6. Strongly agree	6. Strongly agree	6. Strongly agree	6. Strongly agree	6. Strongly agree	4. Agree a little	4. Agree a little	6. Strongly agree	6. Strongly agree	1.Strongly disagree	3. Disagree a little	4. Agree a little	4. Agree a little	5. Agree somehow	5. Agree somehow	4. Agree a little	4. Agree a little	4. Agree a little	4. Agree a little	4. Agree a little	4. Agree a little	4. Agree a little	Moderately agree	Moderately disagree	Moderately agree	Slightly agree	Moderately agree	Slightly agree	Slightly agree	Moderately disagree	Slightly agree	Slightly disagree	Slightly agree	Slightly agree	Slightly agree	Slightly agree	Slightly disagree	Slightly disagree	Slightly agree	Slightly disagree	Yes
Male	21	K.N.U.S.T	BSc Human Biology MB.CH.B	3RD YEAR	CHRISTIANITY	1. Student	4. Agree a little	1.Strongly disagree	1.Strongly disagree	1.Strongly disagree	1.Strongly disagree	1.Strongly disagree	1.Strongly disagree	1.Strongly disagree	1.Strongly disagree	6. Strongly agree	6. Strongly agree	1.Strongly disagree	6. Strongly agree	6. Strongly agree	6. Strongly agree	6. Strongly agree	6. Strongly agree	6. Strongly agree	6. Strongly agree	3. Disagree a little	2. Disagree somehow	6. Strongly agree	6. Strongly agree	6. Strongly agree	Moderately agree	Strongly disagree	Slightly agree	Slightly disagree	Strongly agree	Strongly agree	Strongly agree	Moderately disagree	Strongly disagree	Strongly disagree	Strongly agree	Moderately agree	Slightly agree	Slightly agree	Slightly disagree	Slightly disagree	Strongly agree	Slightly disagree	No
Male	20	K.N.U.S.T	physican assistantship	2ND YEAR	CHRISTIANITY	1. Student	2. Disagree somehow	3. Disagree a little	4. Agree a little	1.Strongly disagree	2. Disagree somehow	4. Agree a little	3. Disagree a little	2. Disagree somehow	3. Disagree a little	5. Agree somehow	4. Agree a little	4. Agree a little	5. Agree somehow	5. Agree somehow	4. Agree a little	5. Agree somehow	5. Agree somehow	4. Agree a little	4. Agree a little	4. Agree a little	4. Agree a little	4. Agree a little	5. Agree somehow	3. Disagree a little	Moderately disagree	Moderately disagree	Slightly agree	Slightly agree	Slightly disagree	Slightly disagree	Moderately agree	Slightly agree	Strongly agree	Slightly agree	Slightly agree	Moderately disagree	Slightly agree	Moderately disagree	Slightly disagree	Moderately disagree	Slightly disagree	Slightly disagree	No
Female	21	K.N.U.S.T	Dental surgery	3RD YEAR	CHRISTIANITY	1. Student	5. Agree somehow	1.Strongly disagree	1.Strongly disagree	1.Strongly disagree	1.Strongly disagree	1.Strongly disagree	4. Agree a little	1.Strongly disagree	1.Strongly disagree	4. Agree a little	4. Agree a little	1.Strongly disagree	6. Strongly agree	5. Agree somehow	5. Agree somehow	4. Agree a little	3. Disagree a little	6. Strongly agree	6. Strongly agree	1.Strongly disagree	1.Strongly disagree	6. Strongly agree	6. Strongly agree	6. Strongly agree	Slightly disagree	Strongly disagree	Slightly disagree	Slightly agree	Strongly agree	Strongly agree	Slightly agree	Moderately agree	Strongly disagree	Slightly agree	Slightly disagree	Slightly agree	Strongly agree	Moderately agree	Strongly disagree	Strongly disagree	Strongly agree	Moderately disagree	Yes
Female	21	K.N.U.S.T	Bsc. Human Biology	3RD YEAR	CHRISTIANITY	1. Student	5. Agree somehow	1.Strongly disagree	1.Strongly disagree	5. Agree somehow	1.Strongly disagree	1.Strongly disagree	4. Agree a little	1.Strongly disagree	2. Disagree somehow	6. Strongly agree	6. Strongly agree	2. Disagree somehow	4. Agree a little	6. Strongly agree	6. Strongly agree	6. Strongly agree	6. Strongly agree	6. Strongly agree	6. Strongly agree	2. Disagree somehow	2. Disagree somehow	6. Strongly agree	6. Strongly agree	6. Strongly agree	Strongly agree	Slightly agree	Strongly agree	Slightly agree	Strongly agree	Strongly agree	Strongly agree	Strongly agree	Strongly disagree	Moderately disagree	Strongly disagree	Strongly agree	Strongly agree	Strongly agree	Strongly disagree	Strongly agree	Strongly agree	Strongly agree	Yes
Female	21	K.N.U.S.T	Bsc. Human Biology	3RD YEAR	CHRISTIANITY	1. Student	6. Strongly agree	1.Strongly disagree	1.Strongly disagree	4. Agree a little	1.Strongly disagree	1.Strongly disagree	4. Agree a little	1.Strongly disagree	1.Strongly disagree	6. Strongly agree	6. Strongly agree	1.Strongly disagree	6. Strongly agree	6. Strongly agree	6. Strongly agree	6. Strongly agree	6. Strongly agree	6. Strongly agree	6. Strongly agree	5. Agree somehow	2. Disagree somehow	6. Strongly agree	6. Strongly agree	6. Strongly agree	Strongly agree	Slightly agree	Strongly agree	Moderately disagree	Strongly agree	Strongly agree	Strongly agree	Strongly agree	Strongly disagree	Slightly agree	Strongly disagree	Strongly agree	Strongly agree	Strongly agree	Moderately disagree	Strongly agree	Strongly agree	Strongly agree	Yes
Male	18	K.N.U.S.T	Medicine	1ST YEAR	CHRISTIANITY	1. Student	4. Agree a little	2. Disagree somehow	4. Agree a little	3. Disagree a little	3. Disagree a little	3. Disagree a little	3. Disagree a little	3. Disagree a little	4. Agree a little	4. Agree a little	3. Disagree a little	4. Agree a little	3. Disagree a little	3. Disagree a little	4. Agree a little	4. Agree a little	3. Disagree a little	4. Agree a little	4. Agree a little	4. Agree a little	4. Agree a little	4. Agree a little	4. Agree a little	4. Agree a little	Slightly agree	Moderately disagree	Slightly agree	Slightly agree	Strongly agree	Strongly agree	Strongly agree	Slightly agree	Moderately agree	Slightly disagree	Slightly agree	Slightly agree	Moderately agree	Slightly agree	Moderately agree	Slightly agree	Slightly agree	Moderately agree	Yes
Female	20	K.N.U.S.T	Physician Assistant	2ND YEAR	CHRISTIANITY	1. Student	4. Agree a little	1.Strongly disagree	1.Strongly disagree	1.Strongly disagree	1.Strongly disagree	1.Strongly disagree	5. Agree somehow	1.Strongly disagree	4. Agree a little	6. Strongly agree	6. Strongly agree	1.Strongly disagree	6. Strongly agree	6. Strongly agree	6. Strongly agree	6. Strongly agree	3. Disagree a little	4. Agree a little	6. Strongly agree	2. Disagree somehow	1.Strongly disagree	6. Strongly agree	6. Strongly agree	6. Strongly agree	Moderately agree	Moderately disagree	Moderately agree	Moderately disagree	Strongly agree	Strongly agree	Moderately agree	Moderately disagree	Moderately disagree	Moderately disagree	Moderately disagree	Moderately disagree	Moderately agree	Moderately agree	Moderately disagree	Moderately disagree	Moderately agree	Moderately agree	No
Male	21	K.N.U.S.T	Human biology	3RD YEAR	CHRISTIANITY	1. Student	6. Strongly agree	1.Strongly disagree	1.Strongly disagree	1.Strongly disagree	1.Strongly disagree	1.Strongly disagree	1.Strongly disagree	1.Strongly disagree	1.Strongly disagree	1.Strongly disagree	1.Strongly disagree	1.Strongly disagree	1.Strongly disagree	1.Strongly disagree	1.Strongly disagree	1.Strongly disagree	1.Strongly disagree	1.Strongly disagree	1.Strongly disagree	1.Strongly disagree	1.Strongly disagree	1.Strongly disagree	1.Strongly disagree	1.Strongly disagree	Moderately agree	Strongly disagree	Moderately agree	Strongly disagree	Strongly agree	Strongly agree	Slightly agree	Strongly agree	Moderately disagree	Moderately agree	Moderately disagree	Strongly agree	Strongly agree	Strongly agree	Strongly disagree	Strongly disagree	Strongly disagree	Slightly agree	No
Male	21	K.N.U.S.T	HUMAN BIOLOGY	3RD YEAR	CHRISTIANITY	1. Student	5. Agree somehow	1.Strongly disagree	1.Strongly disagree	6. Strongly agree	1.Strongly disagree	1.Strongly disagree	1.Strongly disagree	1.Strongly disagree	1.Strongly disagree	6. Strongly agree	1.Strongly disagree	1.Strongly disagree	6. Strongly agree	6. Strongly agree	6. Strongly agree	1.Strongly disagree	6. Strongly agree	1.Strongly disagree	6. Strongly agree	1.Strongly disagree	1.Strongly disagree	6. Strongly agree	6. Strongly agree	6. Strongly agree	Strongly agree	Strongly disagree	Moderately disagree	Strongly agree	Strongly agree	Strongly agree	Strongly agree	Slightly agree	Strongly disagree	Strongly disagree	Strongly disagree	Strongly agree	Strongly agree	Strongly agree	Strongly disagree	Strongly disagree	Strongly agree	Strongly agree	No
Female	20	K.N.U.S.T	Physician Assistantship	2ND YEAR	CHRISTIANITY	1. Student	5. Agree somehow	1.Strongly disagree	1.Strongly disagree	6. Strongly agree	2. Disagree somehow	1.Strongly disagree	6. Strongly agree	1.Strongly disagree	1.Strongly disagree	6. Strongly agree	5. Agree somehow	1.Strongly disagree	6. Strongly agree	6. Strongly agree	6. Strongly agree	1.Strongly disagree	6. Strongly agree	6. Strongly agree	6. Strongly agree	1.Strongly disagree	2. Disagree somehow	6. Strongly agree	6. Strongly agree	6. Strongly agree	Strongly agree	Strongly disagree	Strongly disagree	Moderately disagree	Strongly agree	Strongly disagree	Moderately agree	Moderately agree	Slightly disagree	Moderately disagree	Strongly agree	Moderately disagree	Strongly agree	Slightly disagree	Slightly agree	Strongly agree	Strongly agree	Slightly agree	Yes
Female	21	K.N.U.S.T	HUMAN BIOLOGY	3RD YEAR	CHRISTIANITY	1. Student	6. Strongly agree	3. Disagree a little	3. Disagree a little	1.Strongly disagree	1.Strongly disagree	4. Agree a little	5. Agree somehow	3. Disagree a little	3. Disagree a little	6. Strongly agree	6. Strongly agree	3. Disagree a little	5. Agree somehow	6. Strongly agree	6. Strongly agree	4. Agree a little	5. Agree somehow	6. Strongly agree	6. Strongly agree	4. Agree a little	2. Disagree somehow	6. Strongly agree	4. Agree a little	3. Disagree a little	Slightly disagree	Slightly disagree	Slightly agree	Slightly agree	Strongly agree	Moderately agree	Moderately agree	Moderately disagree	Slightly disagree	Slightly agree	Slightly agree	Slightly agree	Moderately agree	Slightly agree	Slightly agree	Strongly agree	Moderately agree	Slightly agree	Yes
Female	21	K.N.U.S.T	Bsc Human Biology	3RD YEAR	CHRISTIANITY	1. Student	6. Strongly agree	1.Strongly disagree	1.Strongly disagree	2. Disagree somehow	4. Agree a little	5. Agree somehow	6. Strongly agree	1.Strongly disagree	1.Strongly disagree	6. Strongly agree	6. Strongly agree	1.Strongly disagree	5. Agree somehow	6. Strongly agree	6. Strongly agree	1.Strongly disagree	4. Agree a little	5. Agree somehow	6. Strongly agree	2. Disagree somehow	1.Strongly disagree	6. Strongly agree	6. Strongly agree	6. Strongly agree	Slightly agree	Moderately disagree	Moderately agree	Moderately disagree	Moderately agree	Moderately agree	Moderately agree	Moderately agree	Slightly agree	Moderately disagree	Strongly disagree	Strongly agree	Strongly agree	Moderately agree	Slightly agree	Slightly agree	Moderately agree	Moderately agree	Yes
Male	22	K.N.U.S.T	BSC. Human Biology (Medicine)	3RD YEAR	CHRISTIANITY	1. Student	6. Strongly agree	1.Strongly disagree	1.Strongly disagree	6. Strongly agree	6. Strongly agree	1.Strongly disagree	1.Strongly disagree	1.Strongly disagree	1.Strongly disagree	6. Strongly agree	6. Strongly agree	1.Strongly disagree	6. Strongly agree	6. Strongly agree	6. Strongly agree	6. Strongly agree	6. Strongly agree	6. Strongly agree	6. Strongly agree	1.Strongly disagree	1.Strongly disagree	6. Strongly agree	6. Strongly agree	6. Strongly agree	Moderately agree	Strongly disagree	Moderately agree	Moderately agree	Strongly agree	Strongly agree	Moderately agree	Strongly disagree	Strongly disagree	Strongly disagree	Strongly disagree	Strongly agree	Strongly agree	Moderately agree	Moderately agree	Moderately agree	Strongly agree	Strongly disagree	Yes
Male	22	K.N.U.S.T	BSC. HUMAN BIOLOGY (MEDICINE)	3RD YEAR	CHRISTIANITY	1. Student	6. Strongly agree	3. Disagree a little	1.Strongly disagree	1.Strongly disagree	1.Strongly disagree	1.Strongly disagree	1.Strongly disagree	1.Strongly disagree	1.Strongly disagree	6. Strongly agree	6. Strongly agree	1.Strongly disagree	6. Strongly agree	6. Strongly agree	6. Strongly agree	6. Strongly agree	6. Strongly agree	6. Strongly agree	6. Strongly agree	1.Strongly disagree	1.Strongly disagree	6. Strongly agree	6. Strongly agree	6. Strongly agree	Moderately agree	Strongly disagree	Moderately agree	Moderately disagree	Strongly agree	Strongly agree	Moderately agree	Moderately agree	Strongly disagree	Strongly disagree	Strongly disagree	Strongly agree	Strongly agree	Moderately agree	Moderately disagree	Moderately disagree	Strongly agree	Strongly disagree	Yes
Male	22	K.N.U.S.T	Human biology	3RD YEAR	ISLAMIC	1. Student	5. Agree somehow	1.Strongly disagree	2. Disagree somehow	2. Disagree somehow	1.Strongly disagree	2. Disagree somehow	2. Disagree somehow	2. Disagree somehow	1.Strongly disagree	6. Strongly agree	6. Strongly agree	1.Strongly disagree	1.Strongly disagree	6. Strongly agree	6. Strongly agree	4. Agree a little	4. Agree a little	5. Agree somehow	4. Agree a little	4. Agree a little	4. Agree a little	4. Agree a little	6. Strongly agree	6. Strongly agree	Moderately agree	Slightly disagree	Moderately disagree	Slightly disagree	Moderately agree	Strongly agree	Slightly disagree	Moderately agree	Strongly disagree	Strongly disagree	Strongly disagree	Moderately disagree	Strongly agree	Moderately disagree	Slightly agree	Moderately disagree	Moderately agree	Strongly disagree	Yes
Male	22	K.N.U.S.T	Bsc. Human Biology (Dentistry )	3RD YEAR	CHRISTIANITY	1. Student	2. Disagree somehow	2. Disagree somehow	1.Strongly disagree	4. Agree a little	2. Disagree somehow	2. Disagree somehow	1.Strongly disagree	1.Strongly disagree	1.Strongly disagree	6. Strongly agree	6. Strongly agree	1.Strongly disagree	4. Agree a little	6. Strongly agree	6. Strongly agree	4. Agree a little	5. Agree somehow	6. Strongly agree	5. Agree somehow	5. Agree somehow	1.Strongly disagree	6. Strongly agree	6. Strongly agree	5. Agree somehow	Moderately agree	Strongly disagree	Moderately disagree	Moderately disagree	Moderately agree	Strongly agree	Slightly agree	Slightly agree	Moderately disagree	Moderately disagree	Strongly disagree	Moderately agree	Strongly agree	Moderately disagree	Strongly disagree	Strongly disagree	Strongly agree	Moderately disagree	Yes
Female	20	K.N.U.S.T	BSc. Human Biology,MB.CH.B	3RD YEAR	CHRISTIANITY	1. Student	4. Agree a little	4. Agree a little	1.Strongly disagree	2. Disagree somehow	2. Disagree somehow	5. Agree somehow	6. Strongly agree	4. Agree a little	1.Strongly disagree	6. Strongly agree	6. Strongly agree	1.Strongly disagree	6. Strongly agree	6. Strongly agree	6. Strongly agree	4. Agree a little	5. Agree somehow	5. Agree somehow	6. Strongly agree	5. Agree somehow	1.Strongly disagree	6. Strongly agree	5. Agree somehow	6. Strongly agree	Slightly agree	Strongly disagree	Moderately disagree	Moderately disagree	Strongly agree	Moderately agree	Slightly agree	Strongly disagree	Strongly disagree	Strongly disagree	Strongly disagree	Moderately agree	Moderately agree	Slightly agree	Strongly disagree	Strongly disagree	Strongly agree	Moderately agree	Yes
Male	19	K.N.U.S.T	Bsc. HUMAN BIOLOGY MB.CH.B	1ST YEAR	CHRISTIANITY	1. Student	1.Strongly disagree	1.Strongly disagree	1.Strongly disagree	3. Disagree a little	6. Strongly agree	1.Strongly disagree	5. Agree somehow	1.Strongly disagree	2. Disagree somehow	6. Strongly agree	6. Strongly agree	1.Strongly disagree	5. Agree somehow	6. Strongly agree	6. Strongly agree	1.Strongly disagree	6. Strongly agree	6. Strongly agree	6. Strongly agree	5. Agree somehow	1.Strongly disagree	6. Strongly agree	6. Strongly agree	6. Strongly agree	Strongly agree	Strongly disagree	Slightly disagree	Strongly disagree	Strongly agree	Moderately agree	Slightly agree	Slightly agree	Strongly disagree	Strongly disagree	Strongly disagree	Strongly agree	Strongly agree	Strongly disagree	Moderately disagree	Strongly disagree	Strongly agree	Strongly disagree	No
Female	22	K.N.U.S.T	Dentistry	3RD YEAR	CHRISTIANITY	1. Student	5. Agree somehow	1.Strongly disagree	1.Strongly disagree	1.Strongly disagree	1.Strongly disagree	1.Strongly disagree	5. Agree somehow	1.Strongly disagree	3. Disagree a little	6. Strongly agree	5. Agree somehow	5. Agree somehow	3. Disagree a little	6. Strongly agree	6. Strongly agree	4. Agree a little	6. Strongly agree	6. Strongly agree	6. Strongly agree	6. Strongly agree	3. Disagree a little	5. Agree somehow	6. Strongly agree	6. Strongly agree	Strongly agree	Slightly disagree	Slightly agree	Strongly disagree	Moderately disagree	Moderately agree	Slightly disagree	Strongly agree	Strongly disagree	Moderately disagree	Strongly agree	Strongly agree	Strongly agree	Strongly agree	Moderately disagree	Moderately disagree	Strongly agree	Moderately agree	Yes
Female	20	K.N.U.S.T	Human Biology	3RD YEAR	CHRISTIANITY	1. Student	4. Agree a little	1.Strongly disagree	1.Strongly disagree	4. Agree a little	1.Strongly disagree	2. Disagree somehow	5. Agree somehow	1.Strongly disagree	1.Strongly disagree	6. Strongly agree	6. Strongly agree	1.Strongly disagree	3. Disagree a little	5. Agree somehow	6. Strongly agree	5. Agree somehow	6. Strongly agree	6. Strongly agree	6. Strongly agree	1.Strongly disagree	1.Strongly disagree	6. Strongly agree	6. Strongly agree	6. Strongly agree	Moderately agree	Moderately disagree	Slightly disagree	Moderately disagree	Strongly agree	Strongly agree	Moderately agree	Slightly agree	Moderately disagree	Strongly agree	Strongly disagree	Moderately agree	Moderately agree	Moderately agree	Slightly agree	Slightly disagree	Strongly agree	Moderately agree	Yes
Female	22	K.N.U.S.T	Human biology	3RD YEAR	CHRISTIANITY	1. Student	5. Agree somehow	2. Disagree somehow	1.Strongly disagree	3. Disagree a little	1.Strongly disagree	2. Disagree somehow	3. Disagree a little	1.Strongly disagree	1.Strongly disagree	6. Strongly agree	6. Strongly agree	2. Disagree somehow	5. Agree somehow	6. Strongly agree	6. Strongly agree	6. Strongly agree	6. Strongly agree	6. Strongly agree	6. Strongly agree	3. Disagree a little	2. Disagree somehow	6. Strongly agree	6. Strongly agree	6. Strongly agree	Moderately agree	Moderately disagree	Moderately agree	Strongly disagree	Strongly agree	Moderately agree	Moderately disagree	Moderately disagree	Strongly disagree	Strongly disagree	Slightly disagree	Slightly agree	Moderately agree	Moderately disagree	Slightly agree	Strongly disagree	Moderately agree	Slightly agree	Yes
Female	20	K.N.U.S.T	BSC. HUMAN BIOLOGY	3RD YEAR	CHRISTIANITY	1. Student	3. Disagree a little	1.Strongly disagree	1.Strongly disagree	1.Strongly disagree	1.Strongly disagree	2. Disagree somehow	3. Disagree a little	1.Strongly disagree	3. Disagree a little	6. Strongly agree	6. Strongly agree	1.Strongly disagree	1.Strongly disagree	6. Strongly agree	6. Strongly agree	6. Strongly agree	6. Strongly agree	6. Strongly agree	6. Strongly agree	1.Strongly disagree	1.Strongly disagree	1.Strongly disagree	6. Strongly agree	6. Strongly agree	Strongly agree	Strongly disagree	Moderately disagree	Strongly disagree	Strongly agree	Moderately agree	Strongly agree	Strongly disagree	Strongly disagree	Strongly disagree	Strongly agree	Strongly agree	Moderately agree	Moderately agree	Strongly disagree	Strongly agree	Strongly agree	Slightly disagree	Yes
Male	20	K.N.U.S.T	Human biology	3RD YEAR	CHRISTIANITY	1. Student	1.Strongly disagree	2. Disagree somehow	1.Strongly disagree	6. Strongly agree	1.Strongly disagree	2. Disagree somehow	6. Strongly agree	1.Strongly disagree	5. Agree somehow	6. Strongly agree	1.Strongly disagree	1.Strongly disagree	6. Strongly agree	6. Strongly agree	6. Strongly agree	1.Strongly disagree	2. Disagree somehow	5. Agree somehow	6. Strongly agree	5. Agree somehow	1.Strongly disagree	6. Strongly agree	6. Strongly agree	5. Agree somehow	Strongly agree	Strongly agree	Strongly agree	Slightly agree	Strongly agree	Strongly agree	Slightly agree	Slightly disagree	Strongly agree	Strongly agree	Moderately agree	Strongly agree	Strongly agree	Strongly agree	Moderately agree	Moderately agree	Slightly agree	Moderately agree	No
Female	20	K.N.U.S.T	Bsc. Human Biology	3RD YEAR	ISLAMIC	1. Student	1.Strongly disagree	2. Disagree somehow	2. Disagree somehow	1.Strongly disagree	3. Disagree a little	2. Disagree somehow	1.Strongly disagree	1.Strongly disagree	6. Strongly agree	6. Strongly agree	6. Strongly agree	1.Strongly disagree	2. Disagree somehow	6. Strongly agree	6. Strongly agree	5. Agree somehow	6. Strongly agree	6. Strongly agree	6. Strongly agree	6. Strongly agree	2. Disagree somehow	6. Strongly agree	6. Strongly agree	1.Strongly disagree	Moderately agree	Strongly disagree	Moderately disagree	Slightly agree	Strongly disagree	Slightly disagree	Moderately agree	Slightly disagree	Strongly disagree	Slightly disagree	Strongly disagree	Moderately agree	Moderately agree	Slightly agree	Moderately disagree	Strongly disagree	Moderately agree	Moderately agree	Yes
Male	20	K.N.U.S.T	Human Biology	3RD YEAR	CHRISTIANITY	1. Student	1.Strongly disagree	1.Strongly disagree	1.Strongly disagree	1.Strongly disagree	3. Disagree a little	1.Strongly disagree	6. Strongly agree	1.Strongly disagree	1.Strongly disagree	6. Strongly agree	6. Strongly agree	1.Strongly disagree	6. Strongly agree	6. Strongly agree	6. Strongly agree	3. Disagree a little	6. Strongly agree	6. Strongly agree	6. Strongly agree	1.Strongly disagree	1.Strongly disagree	6. Strongly agree	6. Strongly agree	6. Strongly agree	Strongly agree	Strongly disagree	Strongly disagree	Strongly agree	Strongly agree	Strongly agree	Moderately agree	Strongly disagree	Strongly disagree	Strongly disagree	Strongly disagree	Strongly disagree	Strongly agree	Moderately agree	Strongly disagree	Strongly disagree	Strongly agree	Strongly disagree	No
Male	23	K.N.U.S.T	BSC. HUMAN BIOLOGY	3RD YEAR	CHRISTIANITY	1. Student	4. Agree a little	1.Strongly disagree	1.Strongly disagree	1.Strongly disagree	1.Strongly disagree	1.Strongly disagree	1.Strongly disagree	1.Strongly disagree	1.Strongly disagree	6. Strongly agree	6. Strongly agree	1.Strongly disagree	2. Disagree somehow	6. Strongly agree	6. Strongly agree	6. Strongly agree	6. Strongly agree	6. Strongly agree	6. Strongly agree	1.Strongly disagree	1.Strongly disagree	6. Strongly agree	6. Strongly agree	6. Strongly agree	Strongly agree	Strongly disagree	Slightly disagree	Strongly disagree	Strongly agree	Strongly agree	Slightly disagree	Slightly agree	Strongly disagree	Slightly disagree	Strongly disagree	Strongly agree	Strongly agree	Slightly disagree	Strongly disagree	Strongly disagree	Strongly agree	Slightly disagree	No
Male	20	K.N.U.S.T	Human Biology	3RD YEAR	CHRISTIANITY	1. Student	1.Strongly disagree	1.Strongly disagree	1.Strongly disagree	1.Strongly disagree	1.Strongly disagree	1.Strongly disagree	6. Strongly agree	1.Strongly disagree	2. Disagree somehow	6. Strongly agree	6. Strongly agree	1.Strongly disagree	2. Disagree somehow	6. Strongly agree	6. Strongly agree	5. Agree somehow	5. Agree somehow	4. Agree a little	6. Strongly agree	1.Strongly disagree	2. Disagree somehow	6. Strongly agree	6. Strongly agree	6. Strongly agree	Moderately agree	Moderately disagree	Moderately disagree	Strongly disagree	Slightly agree	Strongly agree	Moderately disagree	Slightly agree	Slightly agree	Strongly disagree	Moderately disagree	Moderately agree	Strongly agree	Slightly agree	Moderately disagree	Slightly agree	Strongly agree	Moderately agree	No
Male	22	K.N.U.S.T	Human biology medicine	3RD YEAR	CHRISTIANITY	1. Student	5. Agree somehow	1.Strongly disagree	1.Strongly disagree	4. Agree a little	1.Strongly disagree	1.Strongly disagree	4. Agree a little	1.Strongly disagree	1.Strongly disagree	6. Strongly agree	4. Agree a little	2. Disagree somehow	5. Agree somehow	5. Agree somehow	6. Strongly agree	5. Agree somehow	5. Agree somehow	5. Agree somehow	5. Agree somehow	3. Disagree a little	2. Disagree somehow	5. Agree somehow	6. Strongly agree	6. Strongly agree	Moderately agree	Slightly disagree	Slightly disagree	Strongly disagree	Moderately agree	Moderately agree	Slightly disagree	Slightly disagree	Moderately disagree	Slightly disagree	Slightly agree	Moderately agree	Moderately agree	Moderately agree	Slightly agree	Moderately disagree	Strongly agree	Moderately agree	Yes
Male	22	K.N.U.S.T	Human Biology	3RD YEAR	CHRISTIANITY	1. Student	4. Agree a little	2. Disagree somehow	1.Strongly disagree	2. Disagree somehow	2. Disagree somehow	2. Disagree somehow	6. Strongly agree	1.Strongly disagree	2. Disagree somehow	6. Strongly agree	6. Strongly agree	1.Strongly disagree	6. Strongly agree	6. Strongly agree	6. Strongly agree	1.Strongly disagree	6. Strongly agree	6. Strongly agree	6. Strongly agree	2. Disagree somehow	1.Strongly disagree	6. Strongly agree	6. Strongly agree	6. Strongly agree	Strongly agree	Strongly disagree	Moderately agree	Slightly agree	Moderately agree	Moderately agree	Slightly disagree	Strongly disagree	Moderately disagree	Strongly disagree	Strongly disagree	Moderately disagree	Moderately agree	Moderately disagree	Strongly disagree	Strongly disagree	Moderately agree	Strongly disagree	Yes
Male	20	K.N.U.S.T	HUMAN BIOLOGY	3RD YEAR	CHRISTIANITY	1. Student	2. Disagree somehow	2. Disagree somehow	1.Strongly disagree	2. Disagree somehow	1.Strongly disagree	4. Agree a little	5. Agree somehow	2. Disagree somehow	3. Disagree a little	4. Agree a little	5. Agree somehow	2. Disagree somehow	4. Agree a little	5. Agree somehow	6. Strongly agree	4. Agree a little	4. Agree a little	4. Agree a little	5. Agree somehow	5. Agree somehow	2. Disagree somehow	5. Agree somehow	5. Agree somehow	5. Agree somehow	Moderately agree	Moderately disagree	Slightly agree	Slightly agree	Strongly agree	Moderately agree	Slightly disagree	Moderately agree	Slightly disagree	Slightly disagree	Slightly agree	Moderately agree	Moderately agree	Slightly agree	Slightly disagree	Slightly disagree	Strongly agree	Slightly disagree	No
Female	20	K.N.U.S.T	Human Biology	3RD YEAR	CHRISTIANITY	1. Student	2. Disagree somehow	2. Disagree somehow	1.Strongly disagree	1.Strongly disagree	1.Strongly disagree	2. Disagree somehow	3. Disagree a little	1.Strongly disagree	4. Agree a little	4. Agree a little	6. Strongly agree	1.Strongly disagree	6. Strongly agree	6. Strongly agree	6. Strongly agree	2. Disagree somehow	2. Disagree somehow	5. Agree somehow	6. Strongly agree	1.Strongly disagree	3. Disagree a little	4. Agree a little	5. Agree somehow	6. Strongly agree	Strongly agree	Strongly disagree	Slightly agree	Slightly agree	Slightly agree	Moderately agree	Slightly agree	Slightly disagree	Strongly disagree	Slightly agree	Strongly agree	Moderately agree	Strongly agree	Moderately agree	Slightly disagree	Slightly disagree	Strongly agree	Slightly disagree	Yes
Male	18	K.N.U.S.T	Human Biology	1ST YEAR	CHRISTIANITY	1. Student	3. Disagree a little	4. Agree a little	4. Agree a little	3. Disagree a little	3. Disagree a little	4. Agree a little	4. Agree a little	4. Agree a little	4. Agree a little	4. Agree a little	4. Agree a little	4. Agree a little	4. Agree a little	4. Agree a little	4. Agree a little	4. Agree a little	4. Agree a little	4. Agree a little	4. Agree a little	4. Agree a little	4. Agree a little	4. Agree a little	4. Agree a little	4. Agree a little	Moderately agree	Slightly agree	Slightly agree	Slightly agree	Slightly agree	Slightly disagree	Slightly disagree	Slightly agree	Slightly agree	Slightly disagree	Slightly agree	Slightly agree	Slightly agree	Slightly agree	Slightly agree	Slightly agree	Slightly agree	Slightly agree	No
Female	20	K.N.U.S.T	HUman Biology	3RD YEAR	CHRISTIANITY	1. Student	5. Agree somehow	1.Strongly disagree	1.Strongly disagree	5. Agree somehow	1.Strongly disagree	1.Strongly disagree	6. Strongly agree	1.Strongly disagree	1.Strongly disagree	6. Strongly agree	6. Strongly agree	1.Strongly disagree	6. Strongly agree	6. Strongly agree	6. Strongly agree	5. Agree somehow	5. Agree somehow	5. Agree somehow	6. Strongly agree	1.Strongly disagree	1.Strongly disagree	6. Strongly agree	6. Strongly agree	6. Strongly agree	Strongly agree	Slightly agree	Strongly disagree	Moderately disagree	Moderately agree	Strongly agree	Strongly disagree	Strongly disagree	Strongly disagree	Strongly disagree	Strongly disagree	Strongly disagree	Strongly agree	Moderately disagree	Slightly agree	Strongly disagree	Strongly agree	Moderately disagree	Yes
Female	27	K.N.U.S.T	Hunan biology	3RD YEAR	CHRISTIANITY	1. Student	4. Agree a little	1.Strongly disagree	1.Strongly disagree	1.Strongly disagree	1.Strongly disagree	3. Disagree a little	6. Strongly agree	1.Strongly disagree	3. Disagree a little	6. Strongly agree	6. Strongly agree	1.Strongly disagree	1.Strongly disagree	6. Strongly agree	6. Strongly agree	1.Strongly disagree	3. Disagree a little	3. Disagree a little	6. Strongly agree	1.Strongly disagree	1.Strongly disagree	6. Strongly agree	6. Strongly agree	6. Strongly agree	Strongly agree	Strongly disagree	Strongly disagree	Strongly disagree	Slightly agree	Moderately agree	Slightly disagree	Strongly disagree	Strongly disagree	Strongly disagree	Slightly agree	Moderately agree	Moderately agree	Strongly disagree	Strongly disagree	Moderately disagree	Strongly agree	Strongly disagree	Yes
Female	19	K.N.U.S.T	Human Biology (Dentistry)	3RD YEAR	ISLAMIC	1. Student	5. Agree somehow	1.Strongly disagree	1.Strongly disagree	2. Disagree somehow	1.Strongly disagree	1.Strongly disagree	6. Strongly agree	1.Strongly disagree	3. Disagree a little	6. Strongly agree	6. Strongly agree	1.Strongly disagree	4. Agree a little	6. Strongly agree	6. Strongly agree	5. Agree somehow	5. Agree somehow	6. Strongly agree	6. Strongly agree	4. Agree a little	5. Agree somehow	5. Agree somehow	6. Strongly agree	6. Strongly agree	Slightly agree	Slightly disagree	Strongly disagree	Moderately disagree	Moderately agree	Moderately agree	Slightly disagree	Slightly disagree	Slightly agree	Moderately disagree	Moderately agree	Moderately agree	Strongly agree	Moderately agree	Slightly agree	Strongly agree	Strongly agree	Slightly disagree	Yes
Male	21	K.N.U.S.T	Medicine	3RD YEAR	CHRISTIANITY	1. Student	2. Disagree somehow	1.Strongly disagree	1.Strongly disagree	1.Strongly disagree	1.Strongly disagree	1.Strongly disagree	5. Agree somehow	1.Strongly disagree	2. Disagree somehow	6. Strongly agree	6. Strongly agree	1.Strongly disagree	3. Disagree a little	6. Strongly agree	6. Strongly agree	6. Strongly agree	6. Strongly agree	6. Strongly agree	6. Strongly agree	5. Agree somehow	1.Strongly disagree	6. Strongly agree	6. Strongly agree	6. Strongly agree	Moderately agree	Strongly disagree	Moderately agree	Moderately disagree	Strongly agree	Strongly agree	Slightly agree	Slightly disagree	Strongly disagree	Strongly disagree	Strongly disagree	Strongly agree	Strongly agree	Moderately disagree	Strongly disagree	Strongly disagree	Strongly agree	Strongly agree	No
Female	21	K.N.U.S.T	Human biology	3RD YEAR	CHRISTIANITY	1. Student	4. Agree a little	3. Disagree a little	1.Strongly disagree	3. Disagree a little	2. Disagree somehow	2. Disagree somehow	5. Agree somehow	5. Agree somehow	5. Agree somehow	6. Strongly agree	6. Strongly agree	1.Strongly disagree	5. Agree somehow	5. Agree somehow	6. Strongly agree	2. Disagree somehow	5. Agree somehow	6. Strongly agree	6. Strongly agree	4. Agree a little	2. Disagree somehow	6. Strongly agree	6. Strongly agree	6. Strongly agree	Moderately agree	Slightly disagree	Moderately agree	Moderately agree	Strongly agree	Slightly disagree	Strongly agree	Strongly disagree	Moderately agree	Moderately disagree	Moderately disagree	Moderately agree	Strongly agree	Moderately agree	Moderately disagree	Strongly agree	Strongly agree	Slightly agree	Yes
Male	21	K.N.U.S.T	Dentistry	3RD YEAR	CHRISTIANITY	1. Student	4. Agree a little	1.Strongly disagree	1.Strongly disagree	1.Strongly disagree	1.Strongly disagree	1.Strongly disagree	1.Strongly disagree	1.Strongly disagree	1.Strongly disagree	6. Strongly agree	6. Strongly agree	1.Strongly disagree	1.Strongly disagree	6. Strongly agree	6. Strongly agree	6. Strongly agree	6. Strongly agree	6. Strongly agree	6. Strongly agree	2. Disagree somehow	1.Strongly disagree	6. Strongly agree	6. Strongly agree	6. Strongly agree	Slightly agree	Moderately disagree	Moderately disagree	Moderately disagree	Strongly agree	Moderately agree	Slightly disagree	Moderately agree	Slightly agree	Strongly disagree	Strongly agree	Moderately agree	Strongly agree	Slightly agree	Strongly disagree	Strongly disagree	Strongly agree	Moderately disagree	No
Female	22	K.N.U.S.T	BSc Human Biology	3RD YEAR	CHRISTIANITY	1. Student	5. Agree somehow	1.Strongly disagree	1.Strongly disagree	1.Strongly disagree	3. Disagree a little	2. Disagree somehow	5. Agree somehow	1.Strongly disagree	1.Strongly disagree	5. Agree somehow	1.Strongly disagree	1.Strongly disagree	4. Agree a little	6. Strongly agree	5. Agree somehow	6. Strongly agree	6. Strongly agree	6. Strongly agree	6. Strongly agree	2. Disagree somehow	4. Agree a little	6. Strongly agree	5. Agree somehow	6. Strongly agree	Moderately agree	Strongly disagree	Slightly disagree	Slightly disagree	Strongly agree	Slightly agree	Strongly agree	Slightly disagree	Slightly disagree	Slightly disagree	Moderately disagree	Strongly agree	Strongly agree	Slightly agree	Slightly disagree	Slightly disagree	Strongly agree	Moderately disagree	Yes
Male	23	K.N.U.S.T	Humana biology	1ST YEAR	CHRISTIANITY	1. Student	3. Disagree a little	2. Disagree somehow	1.Strongly disagree	5. Agree somehow	2. Disagree somehow	1.Strongly disagree	5. Agree somehow	1.Strongly disagree	3. Disagree a little	6. Strongly agree	6. Strongly agree	2. Disagree somehow	5. Agree somehow	6. Strongly agree	5. Agree somehow	5. Agree somehow	2. Disagree somehow	5. Agree somehow	6. Strongly agree	4. Agree a little	1.Strongly disagree	6. Strongly agree	4. Agree a little	4. Agree a little	Moderately agree	Strongly disagree	Moderately agree	Slightly agree	Strongly agree	Moderately agree	Moderately agree	Slightly disagree	Moderately disagree	Slightly disagree	Moderately disagree	Slightly agree	Moderately agree	Moderately agree	Moderately disagree	Strongly agree	Moderately agree	Slightly agree	No
Female	19 years	K.N.U.S.T	Human Biology (Medicine)	3RD YEAR	CHRISTIANITY	1. Student	4. Agree a little	1.Strongly disagree	3. Disagree a little	3. Disagree a little	2. Disagree somehow	4. Agree a little	5. Agree somehow	3. Disagree a little	2. Disagree somehow	6. Strongly agree	6. Strongly agree	1.Strongly disagree	6. Strongly agree	6. Strongly agree	6. Strongly agree	6. Strongly agree	6. Strongly agree	5. Agree somehow	5. Agree somehow	2. Disagree somehow	3. Disagree a little	6. Strongly agree	5. Agree somehow	6. Strongly agree	Strongly agree	Strongly disagree	Moderately disagree	Moderately disagree	Moderately disagree	Moderately agree	Strongly agree	Moderately disagree	Moderately disagree	Moderately disagree	Slightly agree	Moderately agree	Strongly agree	Slightly agree	Strongly disagree	Slightly agree	Strongly agree	Slightly agree	Yes
Female	19	K.N.U.S.T	Dentistry	3RD YEAR	CHRISTIANITY	1. Student	1.Strongly disagree	1.Strongly disagree	1.Strongly disagree	3. Disagree a little	3. Disagree a little	2. Disagree somehow	1.Strongly disagree	1.Strongly disagree	2. Disagree somehow	6. Strongly agree	6. Strongly agree	1.Strongly disagree	3. Disagree a little	6. Strongly agree	6. Strongly agree	6. Strongly agree	6. Strongly agree	6. Strongly agree	6. Strongly agree	1.Strongly disagree	1.Strongly disagree	6. Strongly agree	4. Agree a little	4. Agree a little	Moderately agree	Slightly agree	Strongly agree	Slightly disagree	Strongly agree	Slightly agree	Slightly agree	Moderately disagree	Slightly agree	Slightly disagree	Strongly agree	Slightly agree	Strongly agree	Moderately agree	Moderately agree	Slightly agree	Strongly agree	Slightly agree	No
Male	21	K.N.U.S.T	Human Biology	3RD YEAR	CHRISTIANITY	1. Student	4. Agree a little	4. Agree a little	4. Agree a little	3. Disagree a little	2. Disagree somehow	4. Agree a little	4. Agree a little	1.Strongly disagree	4. Agree a little	4. Agree a little	6. Strongly agree	1.Strongly disagree	1.Strongly disagree	6. Strongly agree	6. Strongly agree	5. Agree somehow	5. Agree somehow	5. Agree somehow	6. Strongly agree	4. Agree a little	1.Strongly disagree	6. Strongly agree	6. Strongly agree	6. Strongly agree	Strongly agree	Moderately disagree	Slightly agree	Slightly agree	Moderately agree	Slightly agree	Moderately agree	Moderately disagree	Slightly agree	Moderately disagree	Moderately agree	Moderately agree	Moderately agree	Moderately agree	Slightly agree	Moderately disagree	Moderately agree	Slightly agree	Yes
Female	21	K.N.U.S.T	Medicine	3RD YEAR	CHRISTIANITY	1. Student	5. Agree somehow	2. Disagree somehow	1.Strongly disagree	1.Strongly disagree	1.Strongly disagree	4. Agree a little	6. Strongly agree	1.Strongly disagree	4. Agree a little	5. Agree somehow	6. Strongly agree	2. Disagree somehow	5. Agree somehow	6. Strongly agree	6. Strongly agree	2. Disagree somehow	1.Strongly disagree	6. Strongly agree	5. Agree somehow	1.Strongly disagree	2. Disagree somehow	6. Strongly agree	5. Agree somehow	5. Agree somehow	Strongly agree	Strongly disagree	Moderately agree	Moderately disagree	Strongly agree	Moderately agree	Moderately agree	Moderately disagree	Slightly agree	Slightly agree	Moderately agree	Moderately agree	Strongly agree	Moderately agree	Slightly agree	Slightly disagree	Strongly agree	Moderately agree	Yes
Female	20	K.N.U.S.T	Human Biology	3RD YEAR	CHRISTIANITY	1. Student	5. Agree somehow	1.Strongly disagree	1.Strongly disagree	1.Strongly disagree	3. Disagree a little	1.Strongly disagree	5. Agree somehow	1.Strongly disagree	2. Disagree somehow	6. Strongly agree	6. Strongly agree	1.Strongly disagree	5. Agree somehow	6. Strongly agree	6. Strongly agree	6. Strongly agree	6. Strongly agree	6. Strongly agree	6. Strongly agree	4. Agree a little	3. Disagree a little	6. Strongly agree	6. Strongly agree	6. Strongly agree	Strongly agree	Slightly disagree	Strongly disagree	Moderately agree	Strongly agree	Strongly agree	Slightly disagree	Moderately disagree	Slightly agree	Slightly agree	Slightly agree	Moderately agree	Moderately agree	Moderately agree	Strongly disagree	Slightly agree	Strongly agree	Slightly disagree	Yes
Female	20	K.N.U.S.T	Human Biology	3RD YEAR	CHRISTIANITY	1. Student	5. Agree somehow	1.Strongly disagree	2. Disagree somehow	2. Disagree somehow	1.Strongly disagree	4. Agree a little	1.Strongly disagree	1.Strongly disagree	4. Agree a little	5. Agree somehow	5. Agree somehow	1.Strongly disagree	5. Agree somehow	6. Strongly agree	6. Strongly agree	6. Strongly agree	6. Strongly agree	6. Strongly agree	6. Strongly agree	4. Agree a little	1.Strongly disagree	6. Strongly agree	6. Strongly agree	6. Strongly agree	Moderately agree	Moderately disagree	Moderately disagree	Slightly agree	Slightly agree	Moderately agree	Slightly agree	Slightly agree	Moderately disagree	Slightly agree	Moderately disagree	Moderately agree	Moderately agree	Slightly agree	Moderately disagree	Moderately disagree	Moderately agree	Moderately agree	Yes
Female	23	K.N.U.S.T	Bsc Human Biology	3RD YEAR	CHRISTIANITY	1. Student	3. Disagree a little	1.Strongly disagree	1.Strongly disagree	1.Strongly disagree	1.Strongly disagree	2. Disagree somehow	4. Agree a little	1.Strongly disagree	1.Strongly disagree	5. Agree somehow	6. Strongly agree	1.Strongly disagree	5. Agree somehow	6. Strongly agree	6. Strongly agree	4. Agree a little	3. Disagree a little	1.Strongly disagree	6. Strongly agree	4. Agree a little	1.Strongly disagree	6. Strongly agree	4. Agree a little	5. Agree somehow	Slightly agree	Strongly disagree	Slightly agree	Strongly disagree	Strongly agree	Strongly agree	Slightly disagree	Moderately disagree	Moderately disagree	Moderately disagree	Moderately disagree	Strongly agree	Moderately agree	Slightly agree	Strongly disagree	Slightly disagree	Strongly agree	Moderately disagree	No
Female	23	K.N.U.S.T	Bsc Human Biology	3RD YEAR	CHRISTIANITY	1. Student	3. Disagree a little	1.Strongly disagree	1.Strongly disagree	1.Strongly disagree	1.Strongly disagree	2. Disagree somehow	4. Agree a little	1.Strongly disagree	1.Strongly disagree	5. Agree somehow	6. Strongly agree	1.Strongly disagree	5. Agree somehow	6. Strongly agree	6. Strongly agree	4. Agree a little	3. Disagree a little	1.Strongly disagree	6. Strongly agree	4. Agree a little	1.Strongly disagree	6. Strongly agree	4. Agree a little	5. Agree somehow	Slightly agree	Strongly disagree	Slightly agree	Strongly disagree	Strongly agree	Strongly agree	Slightly disagree	Moderately disagree	Moderately disagree	Moderately disagree	Moderately disagree	Strongly agree	Moderately agree	Slightly agree	Strongly disagree	Slightly disagree	Strongly agree	Moderately disagree	No
Male	20	K.N.U.S.T	BSC PHYSICIAN ASSISTANTSHIP	2ND YEAR	CHRISTIANITY	1. Student	5. Agree somehow	2. Disagree somehow	1.Strongly disagree	3. Disagree a little	2. Disagree somehow	3. Disagree a little	5. Agree somehow	1.Strongly disagree	2. Disagree somehow	5. Agree somehow	5. Agree somehow	2. Disagree somehow	6. Strongly agree	4. Agree a little	6. Strongly agree	6. Strongly agree	3. Disagree a little	2. Disagree somehow	6. Strongly agree	3. Disagree a little	3. Disagree a little	6. Strongly agree	6. Strongly agree	6. Strongly agree	Strongly agree	Slightly agree	Slightly agree	Moderately agree	Strongly agree	Strongly agree	Moderately agree	Strongly agree	Moderately agree	Slightly disagree	Moderately agree	Strongly agree	Strongly agree	Moderately disagree	Slightly agree	Strongly agree	Strongly agree	Slightly agree	Yes
Female	19	K.N.U.S.T	Medicine	1ST YEAR	CHRISTIANITY	1. Student	5. Agree somehow	4. Agree a little	4. Agree a little	3. Disagree a little	4. Agree a little	4. Agree a little	4. Agree a little	1.Strongly disagree	3. Disagree a little	6. Strongly agree	6. Strongly agree	2. Disagree somehow	3. Disagree a little	6. Strongly agree	5. Agree somehow	4. Agree a little	5. Agree somehow	6. Strongly agree	4. Agree a little	5. Agree somehow	1.Strongly disagree	4. Agree a little	6. Strongly agree	6. Strongly agree	Strongly agree	Moderately agree	Slightly agree	Slightly agree	Moderately agree	Moderately agree	Moderately agree	Moderately agree	Moderately disagree	Strongly agree	Moderately agree	Slightly agree	Slightly disagree	Slightly disagree	Moderately agree	Slightly agree	Moderately agree	Slightly disagree	Yes
Male	19	K.N.U.S.T	Medicine	1ST YEAR	CHRISTIANITY	1. Student	4. Agree a little	2. Disagree somehow	1.Strongly disagree	1.Strongly disagree	1.Strongly disagree	1.Strongly disagree	6. Strongly agree	1.Strongly disagree	5. Agree somehow	5. Agree somehow	6. Strongly agree	1.Strongly disagree	6. Strongly agree	6. Strongly agree	6. Strongly agree	6. Strongly agree	4. Agree a little	6. Strongly agree	6. Strongly agree	1.Strongly disagree	1.Strongly disagree	6. Strongly agree	6. Strongly agree	5. Agree somehow	Strongly agree	Moderately disagree	Strongly agree	Moderately disagree	Strongly agree	Strongly agree	Strongly agree	Moderately disagree	Strongly agree	Moderately disagree	Strongly disagree	Strongly agree	Strongly agree	Moderately agree	Slightly agree	Moderately agree	Strongly agree	Moderately agree	Yes
Male	19	K.N.U.S.T	Human Biology(Medicine)	1ST YEAR	CHRISTIANITY	1. Student	4. Agree a little	1.Strongly disagree	1.Strongly disagree	1.Strongly disagree	1.Strongly disagree	2. Disagree somehow	6. Strongly agree	1.Strongly disagree	2. Disagree somehow	6. Strongly agree	6. Strongly agree	5. Agree somehow	6. Strongly agree	6. Strongly agree	6. Strongly agree	6. Strongly agree	6. Strongly agree	5. Agree somehow	6. Strongly agree	5. Agree somehow	2. Disagree somehow	6. Strongly agree	6. Strongly agree	6. Strongly agree	Strongly agree	Moderately disagree	Slightly agree	Slightly agree	Strongly agree	Strongly agree	Strongly disagree	Slightly agree	Strongly disagree	Moderately disagree	Strongly disagree	Moderately agree	Strongly agree	Moderately agree	Strongly disagree	Strongly agree	Strongly agree	Moderately disagree	Yes
Female	22	K.N.U.S.T	BSC PHYSICIAN ASSISTANTSHIP	2ND YEAR	CHRISTIANITY	1. Student	5. Agree somehow	6. Strongly agree	1.Strongly disagree	4. Agree a little	1.Strongly disagree	4. Agree a little	4. Agree a little	1.Strongly disagree	2. Disagree somehow	6. Strongly agree	6. Strongly agree	3. Disagree a little	6. Strongly agree	6. Strongly agree	6. Strongly agree	4. Agree a little	5. Agree somehow	5. Agree somehow	6. Strongly agree	2. Disagree somehow	3. Disagree a little	6. Strongly agree	6. Strongly agree	6. Strongly agree	Strongly agree	Moderately disagree	Slightly disagree	Slightly agree	Strongly agree	Moderately agree	Moderately agree	Moderately agree	Moderately agree	Slightly agree	Strongly agree	Moderately agree	Strongly agree	Moderately agree	Strongly disagree	Strongly agree	Moderately agree	Moderately disagree	Yes
Female	20	K.N.U.S.T	Human Biology	1ST YEAR	CHRISTIANITY	1. Student	6. Strongly agree	1.Strongly disagree	1.Strongly disagree	6. Strongly agree	1.Strongly disagree	3. Disagree a little	6. Strongly agree	1.Strongly disagree	1.Strongly disagree	6. Strongly agree	6. Strongly agree	2. Disagree somehow	5. Agree somehow	6. Strongly agree	6. Strongly agree	1.Strongly disagree	5. Agree somehow	5. Agree somehow	5. Agree somehow	6. Strongly agree	5. Agree somehow	6. Strongly agree	6. Strongly agree	6. Strongly agree	Strongly agree	Moderately disagree	Moderately agree	Strongly agree	Strongly agree	Strongly agree	Slightly agree	Slightly agree	Slightly agree	Strongly disagree	Moderately agree	Moderately disagree	Moderately agree	Strongly agree	Slightly agree	Moderately agree	Moderately agree	Moderately agree	Yes
Male	19	K.N.U.S.T	Human Biology (Medicine)	1ST YEAR	CHRISTIANITY	1. Student	2. Disagree somehow	4. Agree a little	3. Disagree a little	4. Agree a little	2. Disagree somehow	2. Disagree somehow	3. Disagree a little	4. Agree a little	3. Disagree a little	4. Agree a little	3. Disagree a little	4. Agree a little	4. Agree a little	2. Disagree somehow	3. Disagree a little	4. Agree a little	3. Disagree a little	3. Disagree a little	3. Disagree a little	3. Disagree a little	2. Disagree somehow	4. Agree a little	3. Disagree a little	3. Disagree a little	Slightly disagree	Slightly disagree	Slightly disagree	Slightly agree	Slightly agree	Slightly agree	Slightly disagree	Slightly agree	Slightly agree	Slightly disagree	Slightly disagree	Slightly disagree	Slightly disagree	Slightly disagree	Slightly disagree	Slightly agree	Slightly agree	Slightly agree	Yes
Male	18	K.N.U.S.T	HUMAN BIOLOGY	1ST YEAR	CHRISTIANITY	1. Student	1.Strongly disagree	1.Strongly disagree	1.Strongly disagree	6. Strongly agree	1.Strongly disagree	1.Strongly disagree	1.Strongly disagree	1.Strongly disagree	1.Strongly disagree	6. Strongly agree	6. Strongly agree	1.Strongly disagree	6. Strongly agree	6. Strongly agree	6. Strongly agree	1.Strongly disagree	1.Strongly disagree	5. Agree somehow	6. Strongly agree	1.Strongly disagree	1.Strongly disagree	6. Strongly agree	6. Strongly agree	6. Strongly agree	Strongly disagree	Strongly disagree	Strongly disagree	Strongly disagree	Strongly disagree	Moderately disagree	Moderately disagree	Strongly disagree	Slightly agree	Strongly disagree	Strongly agree	Strongly agree	Strongly agree	Strongly disagree	Strongly agree	Strongly disagree	Strongly agree	Strongly disagree	No
Female	22	K.N.U.S.T	Bsc.Human Biology	3RD YEAR	CHRISTIANITY	1. Student	2. Disagree somehow	1.Strongly disagree	1.Strongly disagree	1.Strongly disagree	1.Strongly disagree	1.Strongly disagree	5. Agree somehow	1.Strongly disagree	1.Strongly disagree	6. Strongly agree	6. Strongly agree	1.Strongly disagree	3. Disagree a little	5. Agree somehow	6. Strongly agree	1.Strongly disagree	6. Strongly agree	6. Strongly agree	5. Agree somehow	3. Disagree a little	1.Strongly disagree	6. Strongly agree	6. Strongly agree	6. Strongly agree	Moderately agree	Slightly disagree	Slightly agree	Strongly disagree	Moderately agree	Strongly agree	Moderately agree	Moderately agree	Strongly disagree	Moderately disagree	Strongly disagree	Strongly agree	Strongly agree	Slightly disagree	Slightly agree	Moderately disagree	Strongly agree	Slightly disagree	Yes
Male	19	K.N.U.S.T	Human Biology (Medicine)	1ST YEAR	CHRISTIANITY	1. Student	4. Agree a little	1.Strongly disagree	1.Strongly disagree	5. Agree somehow	1.Strongly disagree	1.Strongly disagree	6. Strongly agree	1.Strongly disagree	2. Disagree somehow	5. Agree somehow	6. Strongly agree	4. Agree a little	6. Strongly agree	6. Strongly agree	6. Strongly agree	6. Strongly agree	6. Strongly agree	6. Strongly agree	6. Strongly agree	1.Strongly disagree	2. Disagree somehow	5. Agree somehow	6. Strongly agree	6. Strongly agree	Strongly agree	Strongly disagree	Strongly disagree	Slightly agree	Slightly agree	Strongly agree	Strongly disagree	Strongly agree	Strongly disagree	Strongly disagree	Strongly agree	Strongly agree	Strongly agree	Slightly agree	Strongly disagree	Strongly agree	Strongly agree	Strongly agree	No
Male	18	K.N.U.S.T	Human Biology	1ST YEAR	CHRISTIANITY	1. Student	1.Strongly disagree	3. Disagree a little	1.Strongly disagree	6. Strongly agree	4. Agree a little	5. Agree somehow	6. Strongly agree	1.Strongly disagree	3. Disagree a little	4. Agree a little	2. Disagree somehow	3. Disagree a little	6. Strongly agree	6. Strongly agree	4. Agree a little	2. Disagree somehow	5. Agree somehow	4. Agree a little	6. Strongly agree	4. Agree a little	1.Strongly disagree	6. Strongly agree	6. Strongly agree	6. Strongly agree	Slightly agree	Strongly disagree	Moderately disagree	Slightly disagree	Strongly agree	Strongly agree	Slightly agree	Slightly disagree	Moderately disagree	Moderately agree	Moderately disagree	Moderately agree	Strongly agree	Strongly agree	Strongly disagree	Strongly agree	Strongly agree	Moderately agree	Yes
Female	19	K.N.U.S.T	BSc HUMAN BIOLOGY	3RD YEAR	CHRISTIANITY	1. Student	3. Disagree a little	3. Disagree a little	1.Strongly disagree	1.Strongly disagree	1.Strongly disagree	1.Strongly disagree	5. Agree somehow	1.Strongly disagree	2. Disagree somehow	6. Strongly agree	6. Strongly agree	1.Strongly disagree	6. Strongly agree	6. Strongly agree	6. Strongly agree	3. Disagree a little	5. Agree somehow	5. Agree somehow	6. Strongly agree	4. Agree a little	4. Agree a little	6. Strongly agree	6. Strongly agree	4. Agree a little	Slightly agree	Moderately disagree	Slightly disagree	Slightly disagree	Strongly agree	Moderately agree	Moderately disagree	Moderately disagree	Moderately disagree	Moderately disagree	Slightly agree	Slightly agree	Moderately agree	Moderately agree	Strongly disagree	Slightly disagree	Strongly agree	Slightly disagree	Yes
Male	20	K.N.U.S.T	BSC. HUMAN BIOLOGY	3RD YEAR	CHRISTIANITY	1. Student	3. Disagree a little	3. Disagree a little	1.Strongly disagree	1.Strongly disagree	3. Disagree a little	1.Strongly disagree	2. Disagree somehow	3. Disagree a little	1.Strongly disagree	6. Strongly agree	5. Agree somehow	1.Strongly disagree	4. Agree a little	6. Strongly agree	6. Strongly agree	4. Agree a little	6. Strongly agree	5. Agree somehow	6. Strongly agree	5. Agree somehow	2. Disagree somehow	5. Agree somehow	4. Agree a little	6. Strongly agree	Moderately agree	Moderately disagree	Strongly agree	Strongly agree	Strongly agree	Moderately agree	Slightly disagree	Slightly agree	Strongly disagree	Slightly disagree	Slightly agree	Moderately agree	Moderately agree	Slightly agree	Slightly agree	Slightly agree	Strongly agree	Slightly disagree	No
Male	19	K.N.U.S.T	Human Biology	3RD YEAR	CHRISTIANITY	1. Student	6. Strongly agree	1.Strongly disagree	1.Strongly disagree	1.Strongly disagree	1.Strongly disagree	1.Strongly disagree	3. Disagree a little	2. Disagree somehow	1.Strongly disagree	6. Strongly agree	5. Agree somehow	1.Strongly disagree	5. Agree somehow	6. Strongly agree	6. Strongly agree	1.Strongly disagree	6. Strongly agree	4. Agree a little	5. Agree somehow	2. Disagree somehow	1.Strongly disagree	6. Strongly agree	6. Strongly agree	6. Strongly agree	Moderately disagree	Slightly agree	Slightly disagree	Slightly agree	Slightly agree	Moderately agree	Moderately agree	Slightly agree	Strongly disagree	Moderately disagree	Moderately disagree	Moderately agree	Moderately agree	Slightly disagree	Slightly disagree	Slightly disagree	Moderately agree	Moderately disagree	Yes
Male	19	K.N.U.S.T	Human Biology	3RD YEAR	CHRISTIANITY	1. Student	6. Strongly agree	1.Strongly disagree	1.Strongly disagree	1.Strongly disagree	1.Strongly disagree	1.Strongly disagree	3. Disagree a little	2. Disagree somehow	1.Strongly disagree	6. Strongly agree	5. Agree somehow	1.Strongly disagree	5. Agree somehow	6. Strongly agree	6. Strongly agree	1.Strongly disagree	6. Strongly agree	4. Agree a little	5. Agree somehow	2. Disagree somehow	1.Strongly disagree	6. Strongly agree	6. Strongly agree	6. Strongly agree	Moderately disagree	Slightly agree	Slightly disagree	Slightly agree	Slightly agree	Moderately agree	Moderately agree	Slightly agree	Strongly disagree	Moderately disagree	Moderately disagree	Moderately agree	Moderately agree	Slightly disagree	Slightly disagree	Slightly disagree	Moderately agree	Moderately disagree	Yes
Female	19	K.N.U.S.T	Medicine	1ST YEAR	CHRISTIANITY	1. Student	1.Strongly disagree	1.Strongly disagree	1.Strongly disagree	1.Strongly disagree	1.Strongly disagree	3. Disagree a little	3. Disagree a little	1.Strongly disagree	1.Strongly disagree	6. Strongly agree	4. Agree a little	2. Disagree somehow	5. Agree somehow	5. Agree somehow	6. Strongly agree	5. Agree somehow	4. Agree a little	4. Agree a little	6. Strongly agree	2. Disagree somehow	3. Disagree a little	5. Agree somehow	5. Agree somehow	6. Strongly agree	Strongly agree	Slightly agree	Strongly agree	Slightly agree	Strongly agree	Strongly agree	Strongly disagree	Moderately agree	Slightly agree	Slightly agree	Slightly agree	Strongly agree	Strongly agree	Moderately agree	Slightly disagree	Moderately agree	Moderately agree	Moderately agree	No
Male	20	K.N.U.S.T	Human Biology	3RD YEAR	CHRISTIANITY	1. Student	3. Disagree a little	1.Strongly disagree	1.Strongly disagree	1.Strongly disagree	1.Strongly disagree	4. Agree a little	6. Strongly agree	1.Strongly disagree	5. Agree somehow	6. Strongly agree	5. Agree somehow	1.Strongly disagree	4. Agree a little	6. Strongly agree	6. Strongly agree	2. Disagree somehow	6. Strongly agree	6. Strongly agree	6. Strongly agree	4. Agree a little	1.Strongly disagree	6. Strongly agree	6. Strongly agree	6. Strongly agree	Moderately agree	Moderately disagree	Strongly agree	Slightly agree	Moderately agree	Slightly agree	Slightly disagree	Slightly agree	Slightly agree	Slightly agree	Moderately disagree	Moderately agree	Moderately agree	Slightly agree	Slightly disagree	Slightly agree	Moderately agree	Moderately agree	No
Female	21	K.N.U.S.T	Human biology (Dentistry)	3RD YEAR	CHRISTIANITY	1. Student	4. Agree a little	4. Agree a little	1.Strongly disagree	4. Agree a little	2. Disagree somehow	5. Agree somehow	6. Strongly agree	1.Strongly disagree	2. Disagree somehow	5. Agree somehow	5. Agree somehow	2. Disagree somehow	6. Strongly agree	6. Strongly agree	6. Strongly agree	4. Agree a little	6. Strongly agree	5. Agree somehow	6. Strongly agree	1.Strongly disagree	1.Strongly disagree	5. Agree somehow	4. Agree a little	5. Agree somehow	Slightly agree	Slightly disagree	Slightly agree	Slightly disagree	Strongly agree	Slightly agree	Moderately disagree	Strongly disagree	Slightly agree	Slightly disagree	Slightly disagree	Slightly agree	Slightly agree	Moderately disagree	Slightly agree	Slightly agree	Strongly agree	Moderately disagree	Yes
Female	20	K.N.U.S.T	Human Biology	3RD YEAR	CHRISTIANITY	1. Student	1.Strongly disagree	5. Agree somehow	4. Agree a little	4. Agree a little	1.Strongly disagree	6. Strongly agree	6. Strongly agree	4. Agree a little	6. Strongly agree	6. Strongly agree	6. Strongly agree	1.Strongly disagree	6. Strongly agree	5. Agree somehow	1.Strongly disagree	1.Strongly disagree	5. Agree somehow	6. Strongly agree	6. Strongly agree	6. Strongly agree	1.Strongly disagree	6. Strongly agree	6. Strongly agree	6. Strongly agree	Strongly agree	Strongly disagree	Moderately agree	Slightly agree	Strongly agree	Strongly agree	Slightly agree	Slightly agree	Strongly disagree	Strongly disagree	Moderately disagree	Strongly agree	Strongly agree	Slightly disagree	Strongly agree	Moderately disagree	Strongly agree	Slightly agree	No
Female	21	K.N.U.S.T	Human Biology	3RD YEAR	CHRISTIANITY	1. Student	4. Agree a little	2. Disagree somehow	1.Strongly disagree	1.Strongly disagree	1.Strongly disagree	3. Disagree a little	5. Agree somehow	1.Strongly disagree	2. Disagree somehow	6. Strongly agree	5. Agree somehow	1.Strongly disagree	5. Agree somehow	5. Agree somehow	6. Strongly agree	4. Agree a little	5. Agree somehow	5. Agree somehow	5. Agree somehow	4. Agree a little	1.Strongly disagree	5. Agree somehow	5. Agree somehow	6. Strongly agree	Moderately agree	Moderately disagree	Slightly agree	Moderately disagree	Moderately agree	Moderately agree	Moderately disagree	Slightly agree	Slightly agree	Moderately agree	Slightly agree	Slightly agree	Moderately agree	Strongly agree	Strongly disagree	Strongly agree	Strongly agree	Moderately agree	Yes
Male	18	K.N.U.S.T	Human biology	1ST YEAR	CHRISTIANITY	1. Student	1.Strongly disagree	3. Disagree a little	3. Disagree a little	4. Agree a little	4. Agree a little	4. Agree a little	5. Agree somehow	3. Disagree a little	4. Agree a little	6. Strongly agree	5. Agree somehow	2. Disagree somehow	3. Disagree a little	4. Agree a little	4. Agree a little	1.Strongly disagree	2. Disagree somehow	3. Disagree a little	5. Agree somehow	4. Agree a little	2. Disagree somehow	5. Agree somehow	4. Agree a little	6. Strongly agree	Strongly agree	Moderately disagree	Slightly agree	Slightly agree	Slightly agree	Moderately agree	Moderately agree	Slightly agree	Slightly disagree	Moderately disagree	Moderately disagree	Slightly agree	Moderately agree	Slightly disagree	Moderately disagree	Slightly disagree	Moderately agree	Slightly disagree	No
Male	22	K.N.U.S.T	Medicine	3RD YEAR	CHRISTIANITY	1. Student	6. Strongly agree	1.Strongly disagree	1.Strongly disagree	2. Disagree somehow	1.Strongly disagree	1.Strongly disagree	1.Strongly disagree	1.Strongly disagree	1.Strongly disagree	6. Strongly agree	6. Strongly agree	2. Disagree somehow	1.Strongly disagree	6. Strongly agree	6. Strongly agree	6. Strongly agree	6. Strongly agree	6. Strongly agree	6. Strongly agree	2. Disagree somehow	2. Disagree somehow	6. Strongly agree	6. Strongly agree	6. Strongly agree	Strongly agree	Slightly disagree	Moderately agree	Strongly disagree	Moderately agree	Strongly agree	Slightly agree	Moderately disagree	Strongly disagree	Strongly agree	Strongly agree	Strongly agree	Strongly agree	Strongly agree	Slightly agree	Strongly agree	Strongly agree	Strongly agree	No
Male	20	K.N.U.S.T	BSc. Human Biology	4TH YEAR	CHRISTIANITY	1. Student	2. Disagree somehow	4. Agree a little	3. Disagree a little	3. Disagree a little	3. Disagree a little	3. Disagree a little	4. Agree a little	3. Disagree a little	1.Strongly disagree	6. Strongly agree	6. Strongly agree	3. Disagree a little	5. Agree somehow	6. Strongly agree	6. Strongly agree	4. Agree a little	4. Agree a little	5. Agree somehow	6. Strongly agree	4. Agree a little	2. Disagree somehow	5. Agree somehow	5. Agree somehow	6. Strongly agree	Moderately agree	Slightly disagree	Moderately agree	Moderately disagree	Moderately agree	Slightly agree	Moderately agree	Slightly agree	Slightly agree	Moderately disagree	Slightly disagree	Moderately agree	Moderately agree	Moderately agree	Strongly disagree	Slightly disagree	Moderately agree	Slightly disagree	Yes
Female	19	K.N.U.S.T	Human biology	3RD YEAR	CHRISTIANITY	1. Student	5. Agree somehow	4. Agree a little	1.Strongly disagree	1.Strongly disagree	1.Strongly disagree	5. Agree somehow	1.Strongly disagree	1.Strongly disagree	1.Strongly disagree	6. Strongly agree	6. Strongly agree	1.Strongly disagree	1.Strongly disagree	6. Strongly agree	6. Strongly agree	6. Strongly agree	6. Strongly agree	6. Strongly agree	6. Strongly agree	4. Agree a little	1.Strongly disagree	6. Strongly agree	6. Strongly agree	6. Strongly agree	Strongly agree	Strongly disagree	Strongly disagree	Strongly agree	Strongly agree	Strongly agree	Strongly disagree	Strongly disagree	Slightly agree	Slightly agree	Strongly disagree	Strongly disagree	Strongly agree	Slightly disagree	Strongly disagree	Slightly disagree	Strongly agree	Moderately disagree	Yes
Male	18	K.N.U.S.T	Human Biology	1ST YEAR	CHRISTIANITY	1. Student	3. Disagree a little	3. Disagree a little	3. Disagree a little	3. Disagree a little	3. Disagree a little	3. Disagree a little	3. Disagree a little	3. Disagree a little	3. Disagree a little	3. Disagree a little	3. Disagree a little	3. Disagree a little	3. Disagree a little	3. Disagree a little	3. Disagree a little	3. Disagree a little	3. Disagree a little	3. Disagree a little	3. Disagree a little	3. Disagree a little	3. Disagree a little	3. Disagree a little	3. Disagree a little	3. Disagree a little	Slightly disagree	Slightly disagree	Slightly disagree	Slightly disagree	Slightly disagree	Slightly disagree	Slightly disagree	Slightly disagree	Slightly disagree	Slightly disagree	Slightly disagree	Slightly disagree	Slightly disagree	Slightly disagree	Slightly disagree	Slightly disagree	Slightly disagree	Slightly disagree	No
Male	18	K.N.U.S.T	Human Biology	1ST YEAR	CHRISTIANITY	1. Student	3. Disagree a little	3. Disagree a little	3. Disagree a little	3. Disagree a little	3. Disagree a little	3. Disagree a little	3. Disagree a little	3. Disagree a little	3. Disagree a little	3. Disagree a little	3. Disagree a little	3. Disagree a little	3. Disagree a little	3. Disagree a little	3. Disagree a little	3. Disagree a little	3. Disagree a little	3. Disagree a little	3. Disagree a little	3. Disagree a little	3. Disagree a little	3. Disagree a little	3. Disagree a little	3. Disagree a little	Slightly disagree	Slightly disagree	Slightly disagree	Slightly disagree	Slightly disagree	Slightly disagree	Slightly disagree	Slightly disagree	Slightly disagree	Slightly disagree	Slightly disagree	Slightly disagree	Slightly disagree	Slightly disagree	Slightly disagree	Slightly disagree	Slightly disagree	Slightly disagree	No
Female	19	K.N.U.S.T	Human Biology	1ST YEAR	CHRISTIANITY	1. Student	4. Agree a little	4. Agree a little	1.Strongly disagree	4. Agree a little	5. Agree somehow	4. Agree a little	4. Agree a little	1.Strongly disagree	4. Agree a little	6. Strongly agree	6. Strongly agree	1.Strongly disagree	6. Strongly agree	6. Strongly agree	6. Strongly agree	5. Agree somehow	4. Agree a little	6. Strongly agree	6. Strongly agree	4. Agree a little	5. Agree somehow	6. Strongly agree	6. Strongly agree	6. Strongly agree	Slightly agree	Slightly disagree	Slightly agree	Slightly agree	Strongly agree	Moderately agree	Slightly agree	Strongly disagree	Moderately disagree	Strongly disagree	Moderately disagree	Moderately disagree	Moderately agree	Slightly agree	Slightly agree	Moderately agree	Moderately agree	Moderately agree	Yes
Female	19	K.N.U.S.T	Human Biology (Medicine)	1ST YEAR	CHRISTIANITY	1. Student	1.Strongly disagree	2. Disagree somehow	1.Strongly disagree	1.Strongly disagree	1.Strongly disagree	2. Disagree somehow	5. Agree somehow	1.Strongly disagree	2. Disagree somehow	6. Strongly agree	6. Strongly agree	1.Strongly disagree	1.Strongly disagree	6. Strongly agree	6. Strongly agree	4. Agree a little	6. Strongly agree	5. Agree somehow	6. Strongly agree	1.Strongly disagree	1.Strongly disagree	6. Strongly agree	6. Strongly agree	6. Strongly agree	Strongly agree	Strongly disagree	Moderately agree	Slightly agree	Moderately agree	Moderately agree	Strongly agree	Moderately agree	Slightly disagree	Slightly agree	Slightly disagree	Strongly agree	Strongly agree	Moderately agree	Moderately disagree	Moderately disagree	Strongly agree	Slightly disagree	Yes
Male	18	K.N.U.S.T	Human Biology	1ST YEAR	CHRISTIANITY	1. Student	1.Strongly disagree	3. Disagree a little	1.Strongly disagree	6. Strongly agree	4. Agree a little	5. Agree somehow	6. Strongly agree	1.Strongly disagree	3. Disagree a little	4. Agree a little	2. Disagree somehow	3. Disagree a little	6. Strongly agree	6. Strongly agree	4. Agree a little	2. Disagree somehow	5. Agree somehow	4. Agree a little	6. Strongly agree	4. Agree a little	1.Strongly disagree	6. Strongly agree	6. Strongly agree	6. Strongly agree	Slightly agree	Strongly disagree	Moderately disagree	Slightly disagree	Strongly agree	Strongly agree	Slightly agree	Slightly disagree	Moderately disagree	Moderately agree	Moderately disagree	Moderately agree	Strongly agree	Strongly agree	Strongly disagree	Strongly agree	Strongly agree	Moderately agree	Yes
Male	20	K.N.U.S.T	Human Biology	3RD YEAR	CHRISTIANITY	1. Student	3. Disagree a little	1.Strongly disagree	1.Strongly disagree	1.Strongly disagree	1.Strongly disagree	4. Agree a little	6. Strongly agree	1.Strongly disagree	5. Agree somehow	6. Strongly agree	5. Agree somehow	1.Strongly disagree	4. Agree a little	6. Strongly agree	6. Strongly agree	2. Disagree somehow	6. Strongly agree	6. Strongly agree	6. Strongly agree	4. Agree a little	1.Strongly disagree	6. Strongly agree	6. Strongly agree	6. Strongly agree	Moderately agree	Moderately disagree	Strongly agree	Slightly agree	Moderately agree	Slightly agree	Slightly disagree	Slightly agree	Slightly agree	Slightly agree	Moderately disagree	Moderately agree	Moderately agree	Slightly agree	Slightly disagree	Slightly agree	Moderately agree	Moderately agree	No
Female	18	K.N.U.S.T	Human Biology	1ST YEAR	CHRISTIANITY	1. Student	6. Strongly agree	1.Strongly disagree	1.Strongly disagree	4. Agree a little	1.Strongly disagree	1.Strongly disagree	6. Strongly agree	1.Strongly disagree	1.Strongly disagree	6. Strongly agree	6. Strongly agree	1.Strongly disagree	6. Strongly agree	6. Strongly agree	6. Strongly agree	6. Strongly agree	6. Strongly agree	6. Strongly agree	6. Strongly agree	1.Strongly disagree	1.Strongly disagree	6. Strongly agree	6. Strongly agree	6. Strongly agree	Moderately agree	Strongly disagree	Strongly disagree	Strongly agree	Strongly agree	Strongly agree	Moderately agree	Strongly disagree	Strongly disagree	Moderately agree	Strongly agree	Strongly agree	Strongly agree	Slightly agree	Strongly disagree	Strongly disagree	Strongly agree	Slightly agree	Yes
Male	19	K.N.U.S.T	Human Biology	3RD YEAR	CHRISTIANITY	1. Student	6. Strongly agree	1.Strongly disagree	1.Strongly disagree	1.Strongly disagree	1.Strongly disagree	1.Strongly disagree	3. Disagree a little	2. Disagree somehow	1.Strongly disagree	6. Strongly agree	5. Agree somehow	1.Strongly disagree	5. Agree somehow	6. Strongly agree	6. Strongly agree	1.Strongly disagree	6. Strongly agree	4. Agree a little	5. Agree somehow	2. Disagree somehow	1.Strongly disagree	6. Strongly agree	6. Strongly agree	6. Strongly agree	Moderately disagree	Slightly agree	Slightly disagree	Slightly agree	Slightly agree	Moderately agree	Moderately agree	Slightly agree	Strongly disagree	Moderately disagree	Moderately disagree	Moderately agree	Moderately agree	Slightly disagree	Slightly disagree	Slightly disagree	Moderately agree	Moderately disagree	Yes
Female	18	K.N.U.S.T	Human Biology	1ST YEAR	CHRISTIANITY	1. Student	3. Disagree a little	4. Agree a little	1.Strongly disagree	2. Disagree somehow	2. Disagree somehow	1.Strongly disagree	6. Strongly agree	1.Strongly disagree	4. Agree a little	6. Strongly agree	6. Strongly agree	2. Disagree somehow	5. Agree somehow	5. Agree somehow	6. Strongly agree	4. Agree a little	5. Agree somehow	3. Disagree a little	5. Agree somehow	2. Disagree somehow	1.Strongly disagree	6. Strongly agree	6. Strongly agree	6. Strongly agree	Strongly agree	Strongly disagree	Moderately agree	Slightly disagree	Strongly agree	Strongly agree	Moderately disagree	Moderately agree	Strongly disagree	Strongly disagree	Strongly disagree	Slightly disagree	Slightly agree	Slightly disagree	Slightly disagree	Strongly disagree	Moderately agree	Slightly disagree	No
Male	20	K.N.U.S.T	Human biology	3RD YEAR	CHRISTIANITY	1. Student	1.Strongly disagree	2. Disagree somehow	1.Strongly disagree	6. Strongly agree	1.Strongly disagree	2. Disagree somehow	6. Strongly agree	1.Strongly disagree	5. Agree somehow	6. Strongly agree	1.Strongly disagree	1.Strongly disagree	6. Strongly agree	6. Strongly agree	6. Strongly agree	1.Strongly disagree	2. Disagree somehow	5. Agree somehow	6. Strongly agree	5. Agree somehow	1.Strongly disagree	6. Strongly agree	6. Strongly agree	5. Agree somehow	Strongly agree	Strongly agree	Strongly agree	Slightly agree	Strongly agree	Strongly agree	Slightly agree	Slightly disagree	Strongly agree	Strongly agree	Moderately agree	Strongly agree	Strongly agree	Strongly agree	Moderately agree	Moderately agree	Slightly agree	Moderately agree	No
Male	18	K.N.U.S.T	Human Biology	1ST YEAR	CHRISTIANITY	1. Student	1.Strongly disagree	1.Strongly disagree	1.Strongly disagree	1.Strongly disagree	1.Strongly disagree	5. Agree somehow	5. Agree somehow	1.Strongly disagree	3. Disagree a little	6. Strongly agree	6. Strongly agree	2. Disagree somehow	6. Strongly agree	6. Strongly agree	6. Strongly agree	6. Strongly agree	6. Strongly agree	6. Strongly agree	6. Strongly agree	5. Agree somehow	4. Agree a little	6. Strongly agree	6. Strongly agree	6. Strongly agree	Strongly agree	Strongly disagree	Moderately agree	Moderately disagree	Strongly agree	Slightly disagree	Strongly disagree	Slightly agree	Slightly disagree	Slightly agree	Slightly disagree	Slightly agree	Strongly agree	Strongly agree	Slightly disagree	Strongly agree	Strongly agree	Strongly agree	No
Male	20	K.N.U.S.T	BSC. HUMAN BIOLOGY	3RD YEAR	CHRISTIANITY	1. Student	3. Disagree a little	3. Disagree a little	1.Strongly disagree	1.Strongly disagree	3. Disagree a little	1.Strongly disagree	2. Disagree somehow	3. Disagree a little	1.Strongly disagree	6. Strongly agree	5. Agree somehow	1.Strongly disagree	4. Agree a little	6. Strongly agree	6. Strongly agree	4. Agree a little	6. Strongly agree	5. Agree somehow	6. Strongly agree	5. Agree somehow	2. Disagree somehow	5. Agree somehow	4. Agree a little	6. Strongly agree	Moderately agree	Moderately disagree	Strongly agree	Strongly agree	Strongly agree	Moderately agree	Slightly disagree	Slightly agree	Strongly disagree	Slightly disagree	Slightly agree	Moderately agree	Moderately agree	Slightly agree	Slightly agree	Slightly agree	Strongly agree	Slightly disagree	No
Male	20	K.N.U.S.T	BSC. HUMAN BIOLOGY	3RD YEAR	CHRISTIANITY	1. Student	3. Disagree a little	3. Disagree a little	1.Strongly disagree	1.Strongly disagree	3. Disagree a little	1.Strongly disagree	2. Disagree somehow	3. Disagree a little	1.Strongly disagree	6. Strongly agree	5. Agree somehow	1.Strongly disagree	4. Agree a little	6. Strongly agree	6. Strongly agree	4. Agree a little	6. Strongly agree	5. Agree somehow	6. Strongly agree	5. Agree somehow	2. Disagree somehow	5. Agree somehow	4. Agree a little	6. Strongly agree	Moderately agree	Moderately disagree	Strongly agree	Strongly agree	Strongly agree	Moderately agree	Slightly disagree	Slightly agree	Strongly disagree	Slightly disagree	Slightly agree	Moderately agree	Moderately agree	Slightly agree	Slightly agree	Slightly agree	Strongly agree	Slightly disagree	No
[truncated: 9 more columns]
